# Supplementary material for: Utilization of DMSO as a solvent-cum-reactant: synthesis of fused 2-aryl-4-methylquinolines
Source: Royal Society of Chemistry journal article supplement (doi:10.1039/d4ob00938j), 2024-01-01

## *Electronic Supporting Information*

### **Utilization of DMSO as a solvent-cum-reactant: Synthesis of fused 2-aryl-4-methylquinolines**

Sabina Yashmin,<sup>a</sup> Karthik AM,<sup>a</sup> Abu Taleb Khan,<sup>\*a</sup>

<sup>a</sup>*Department of Chemistry, Indian Institute of Technology Guwahati, Guwahati-781 039, Assam, India, Tel.: +91 361 2582305. Fax: +91 361 2582349, E-mail: [atk@iitg.ac.in](mailto:atk@iitg.ac.in)*

| <b>Content</b>                                                          | <b>Page No.</b> |
|-------------------------------------------------------------------------|-----------------|
| General information and methods                                         | S2              |
| Crystal structure, data and structure refinement for compound <b>3g</b> | S2-S3           |
| NMR and HRMS spectra of all the compounds                               | S4-S99          |
| HRMS of reaction intermediates                                          | S100-S102       |

## General information and methods

All chemicals were obtained from commercial sources and were used without further purifications. Reactions were monitored via TLC, prepared using silica gel for TLC with binder and fluorescence indicator GF254. The chromatography separation was carried out using 60–120 mesh-sized silica gel. Melting points were determined on a melting point apparatus and are uncorrected.  $^1\text{H}$  and  $^{13}\text{C}$  NMR spectra were recorded on 400, 500, and 600 MHz and 100, 125, and 150 MHz NMR spectrometers. Chemical shifts ( $\delta$  scale) are reported in parts per million (ppm). TMS was used as an internal reference; The  $^1\text{H}$  and  $^{13}\text{C}$  spectra are referenced for  $\text{CDCl}_3$  at 7.26 and 77.16 ppm respectively.  $^1\text{H}$  NMR spectra are reported in the order: multiplicity, coupling constant ( $J$  value) in hertz (Hz), and no. of protons; signals were characterized as s (singlet), d (doublet), t (triplet), m (multiplet), and bs (broad). IR spectra were recorded on an IR spectrophotometer. HRMS spectra were recorded using ESI and APCI (TOF) mode. The crystal structure was determined using a single crystal XRD diffractometer. Complete crystallographic data of **3g** (CCDC no. 2291148) for the structural analysis have been deposited with the Cambridge Crystallographic Data Centre, Copies of this information may be obtained free of charge from the Director, Cambridge Crystallographic Data Centre, 12 Union Road, Cambridge CB2 1EZ, UK, (fax: +44-1223-336033, e-mail: deposit@ccdc.cam.ac.uk or via: www.ccdc.cam.ac.uk).

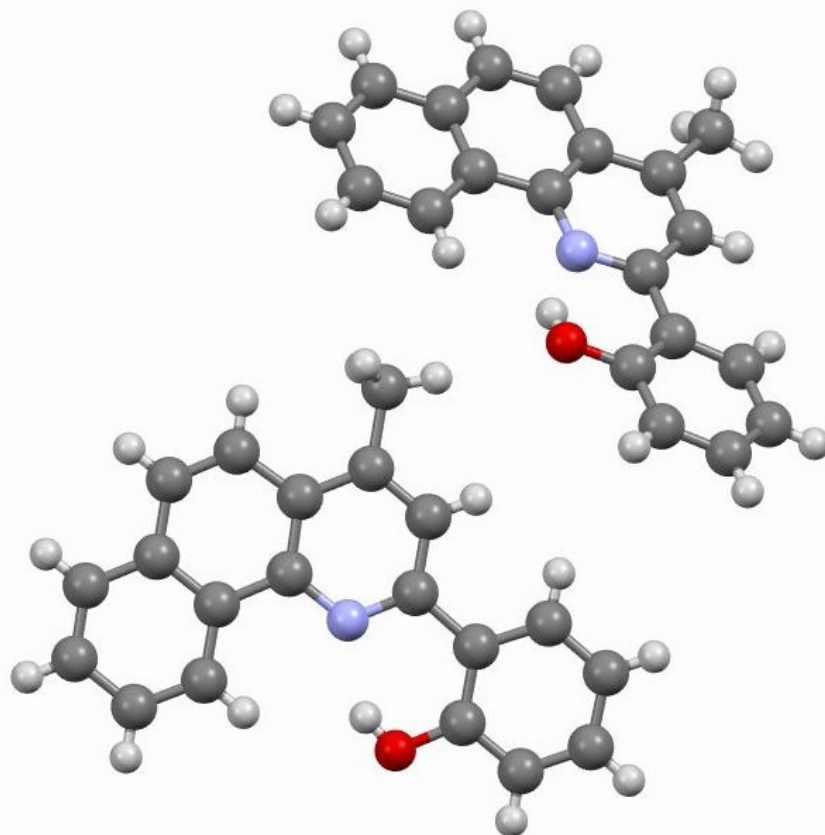

**Figure S1.** ORTEP diagrams of compound **3g**

**Table S1.** Crystal data and structure refinement for compound **3g**

| <b>Entry</b> | <b>Identification code</b> | <b>Compound 3g</b>                                                           |
|--------------|----------------------------|------------------------------------------------------------------------------|
| 01           | Empirical formula          | C <sub>20</sub> H <sub>15</sub> NO                                           |
| 02           | Formula weight             | 285.3                                                                        |
| 03           | Temperature                | 297 K                                                                        |
| 04           | Wavelength                 | 0.71073                                                                      |
| 05           | Radiation type             | MoK $\alpha$                                                                 |
| 06           | Radiation system           | Fine-focus sealed tube                                                       |
| 07           | Crystal system             | Monoclinic                                                                   |
| 08           | Space group                | P 21/n                                                                       |
| 09           | Cell length                | a=16.9016 (15)<br>b=8.6430 (8)<br>c=21.0199 (8)                              |
| 10           | Cell angle                 | $\alpha$ =90<br>$\beta$ =108.891 (3)<br>$\gamma$ =90                         |
| 11           | Cell volume                | 2905.2 (5)                                                                   |
| 12           | Density                    | 1.305                                                                        |
| 13           | Completeness to theta      | 99.4                                                                         |
| 14           | Absorption correction      | multi-scan                                                                   |
| 15           | Refinement method          | Full-matrix least-squares on F <sup>2</sup>                                  |
| 16           | Index ranges               | -10 $\leq$ h $\leq$ 10,<br>-24 $\leq$ k $\leq$ 24,<br>-13 $\leq$ l $\leq$ 13 |
| 17           | Reflection number          | 3415                                                                         |
| 18           | Theta (max)                | 25.02                                                                        |
| 19           | Theta (min)                | 2.57                                                                         |
| 20           | Cell formula units Z       | 4                                                                            |
| 21           | CCDC no                    | 2291148                                                                      |

# <sup>1</sup>H NMR (400 MHz, CDCl<sub>3</sub>) spectrum of compound 1bc

ATK-K-2NA-ES-1H.1.fid  
ATK-K-2NA-ES-1H

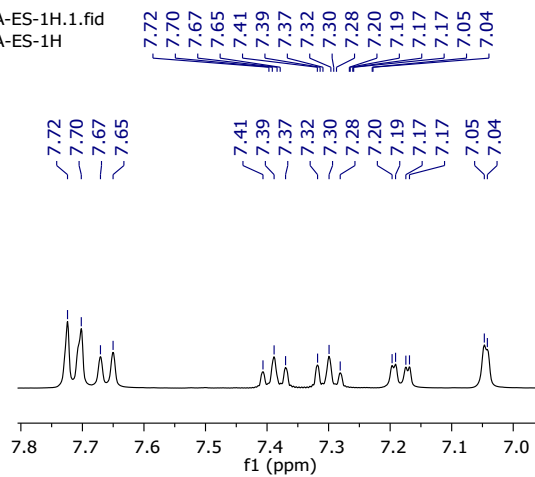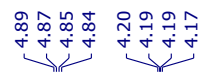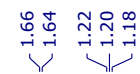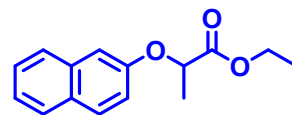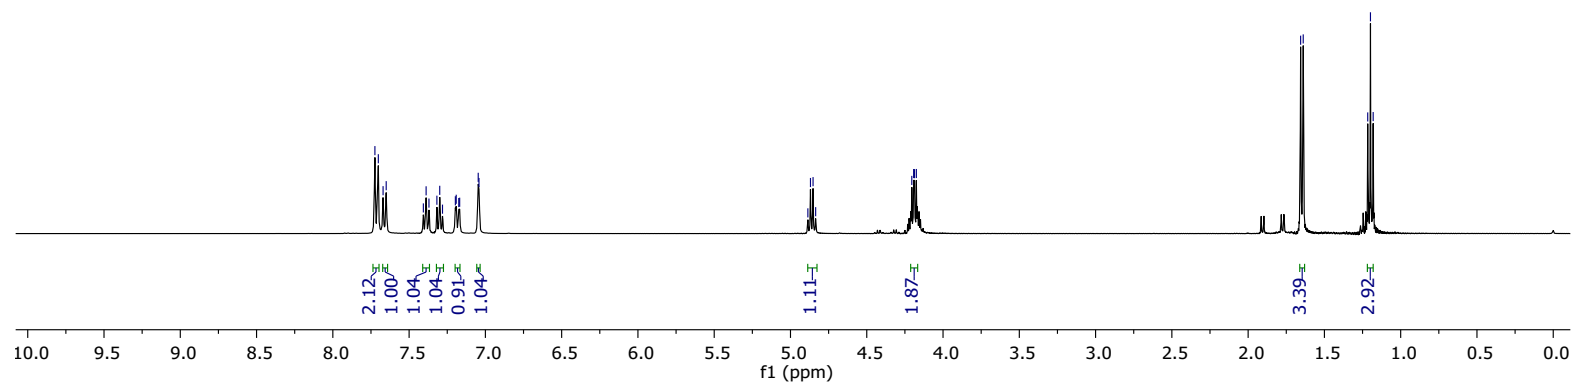

**$^{13}\text{C}\{^1\text{H}\}$  NMR (100 MHz,  $\text{CDCl}_3$ ) Spectrum of compound 1bc**

ATK-K-2NA-ES-13C.3.fid  
ATK-K-2NA-ES-13C

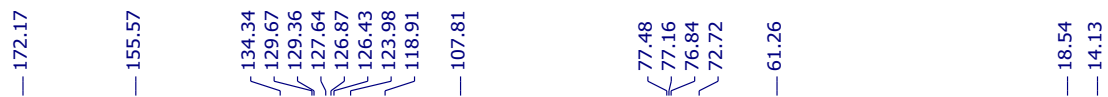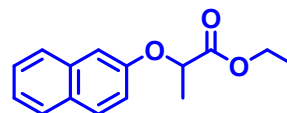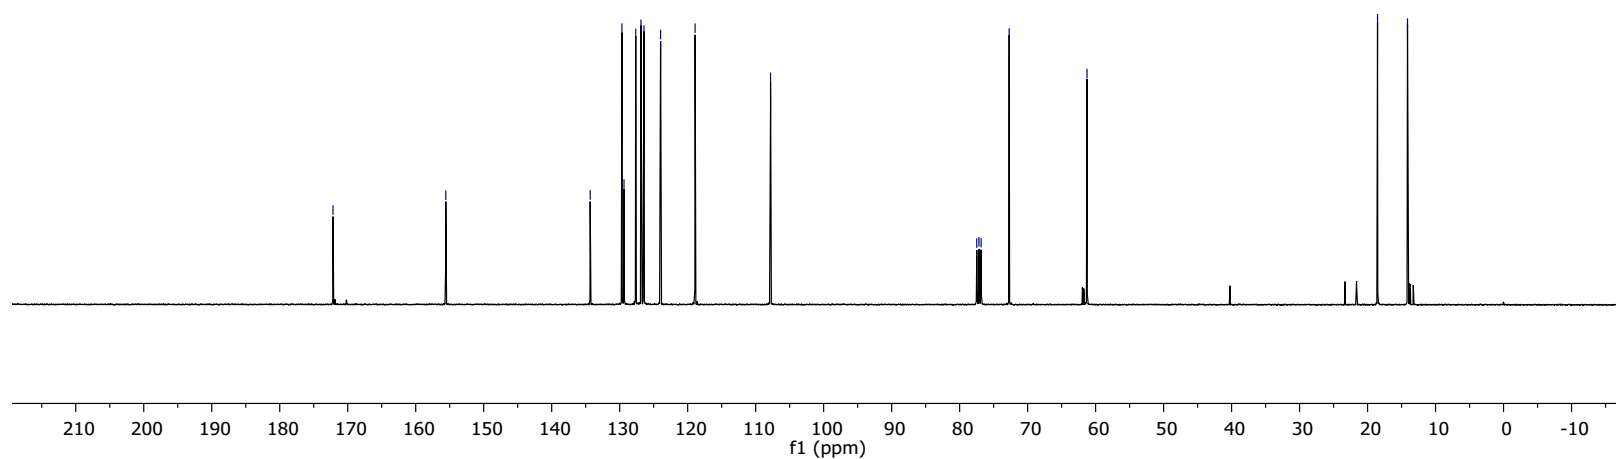

## HRMS spectrum of compound 1bc

|                                 |                        |         |                 |             |
|---------------------------------|------------------------|---------|-----------------|-------------|
| Sample3                         | Position               | P1-A2   | Instrument Name | QTOF        |
| SYSTEM (SYSTEM)                 | Inj Vol                | 5       | InjPosition     |             |
| Sample                          | IRM Calibration Status | Success | Data Filename   | sy-2na es.d |
| DIRECT MASS_POSITIVE_100_1500.m | Comment                |         | Acquired Time   | 13-Sep-23 0 |

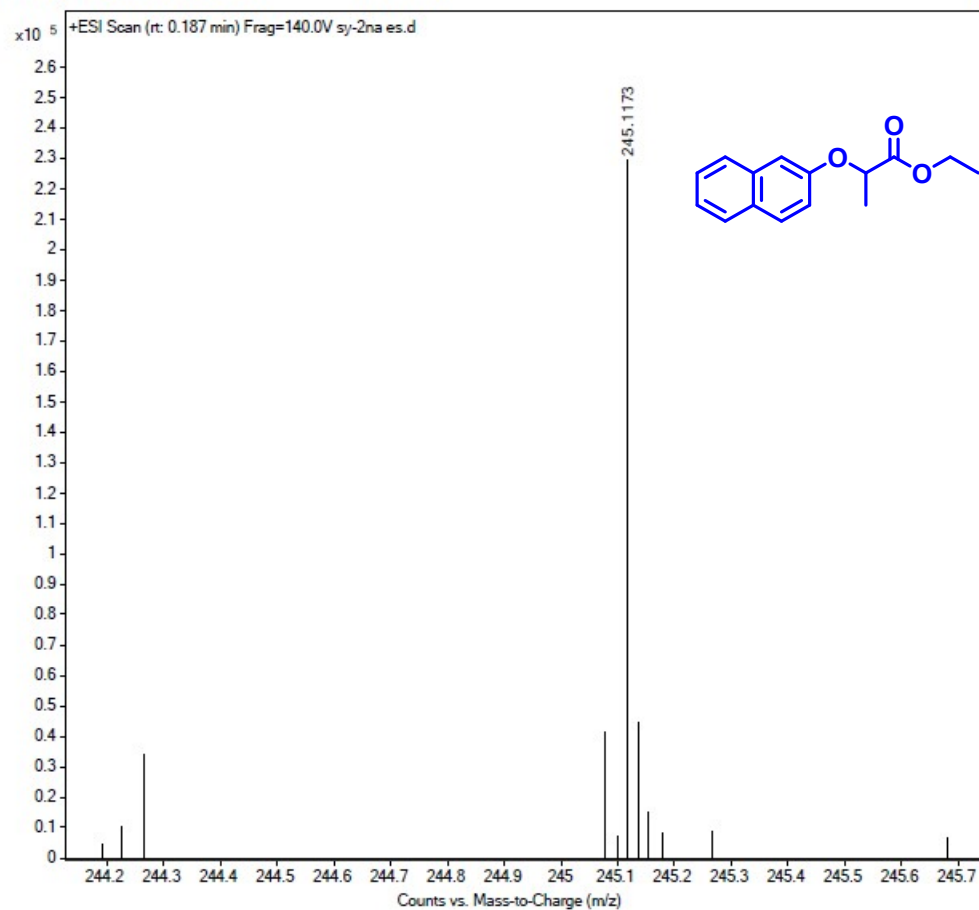

# <sup>1</sup>H NMR (400 MHz, CDCl<sub>3</sub>) Spectrum of compound 1bd

ATK-KM-2NA-AMD-1H.1.fid — ATK-KM-2NA-AMD-1H

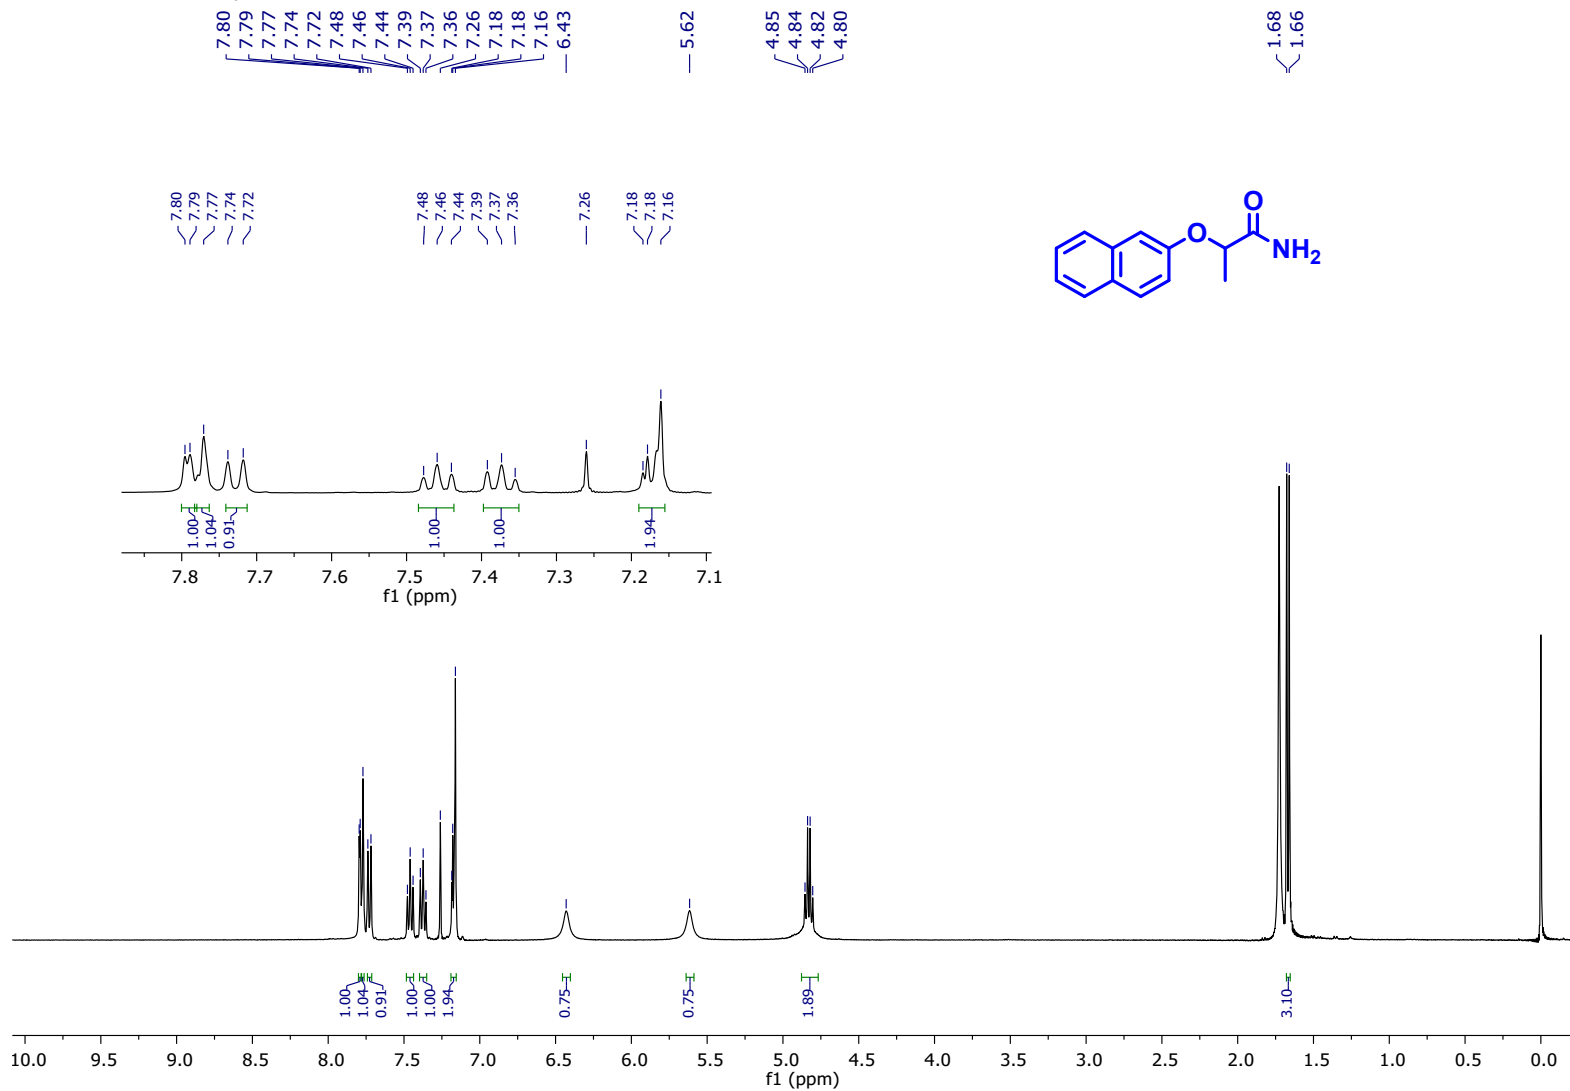

$^{13}\text{C}\{^1\text{H}\}$  NMR (100 MHz,  $\text{CDCl}_3$ ) Spectrum of compound 1bd

KM-2NA-AMD-13C.1.fid  
KM-2NA-AMD-13C

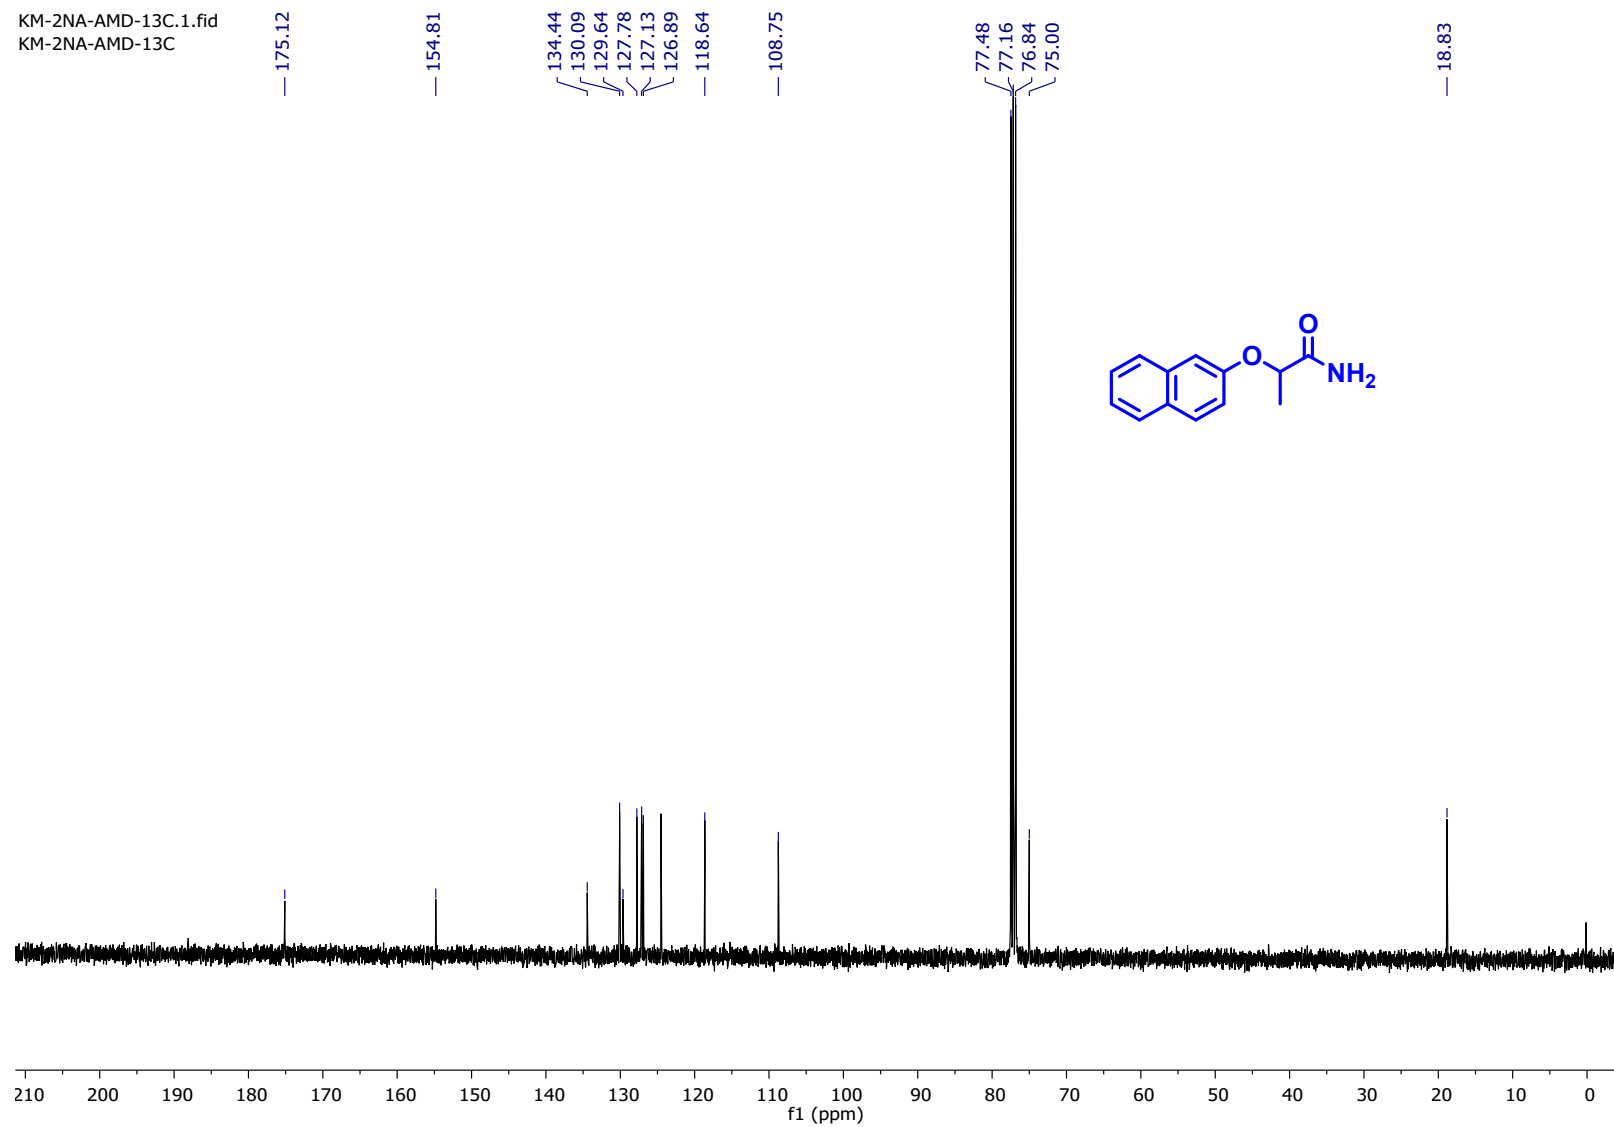



## HRMS spectrum of compound 1bd

|                                 |                        |         |                 |               |
|---------------------------------|------------------------|---------|-----------------|---------------|
| sample2                         | Position               | P1-A1   | Instrument Name | QTOF          |
| SYSTEM (SYSTEM)                 | Inj Vol                | 5       | InjPosition     |               |
| Sample                          | IRM Calibration Status | Success | Data Filename   | sy-2na am.d   |
| DIRECT MASS_POSITIVE_100_1500.m | Comment                |         | Acquired Time   | 13-Sep-23 09: |

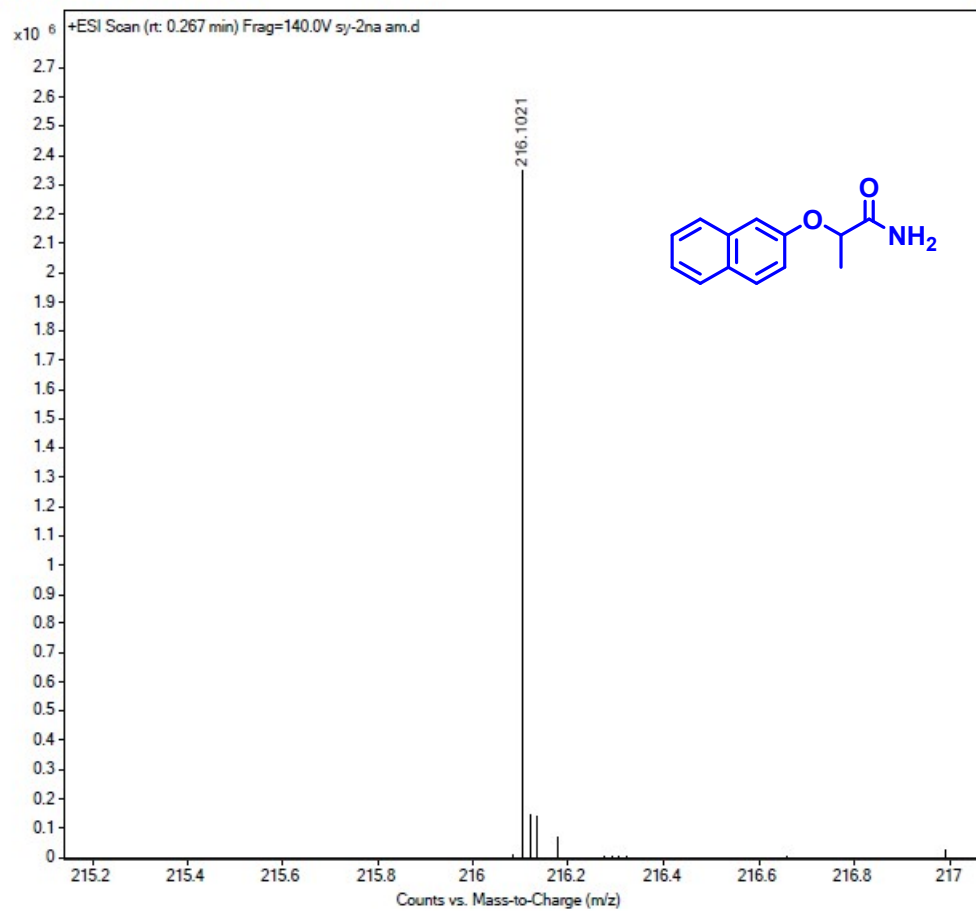

**<sup>1</sup>H NMR (400 MHz, CDCl<sub>3</sub>) Spectrum of compound 1b**

ATK-KM-2NA-  
ATK-KM-2NA-  
7.7045  
7.6845  
7.6728  
7.6512  
7.6055  
7.5848  
7.3856  
7.3672  
7.3484  
7.2601  
7.2455  
7.2266  
7.2080  
6.9943  
6.9892  
6.9641  
6.9584  
6.9425  
6.9368

3.8382

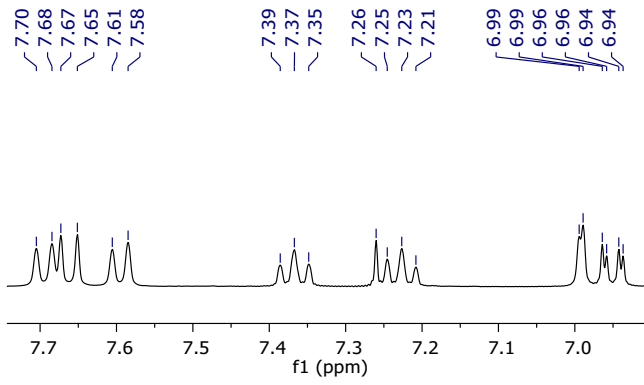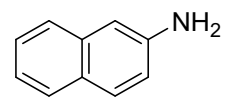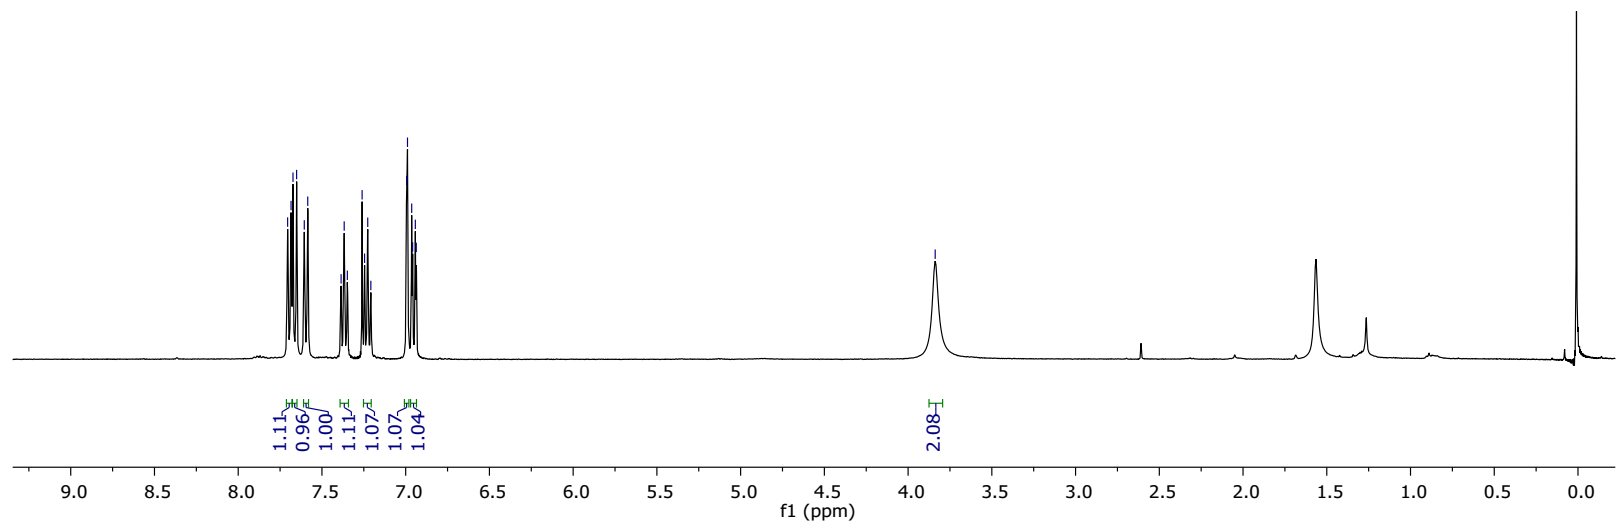

$^{13}\text{C}\{^1\text{H}\}$  NMR (100 MHz,  $\text{CDCl}_3$ ) Spectrum of compound 1b

KM-2NA-13C.1.fid  
KM-2NA-13C

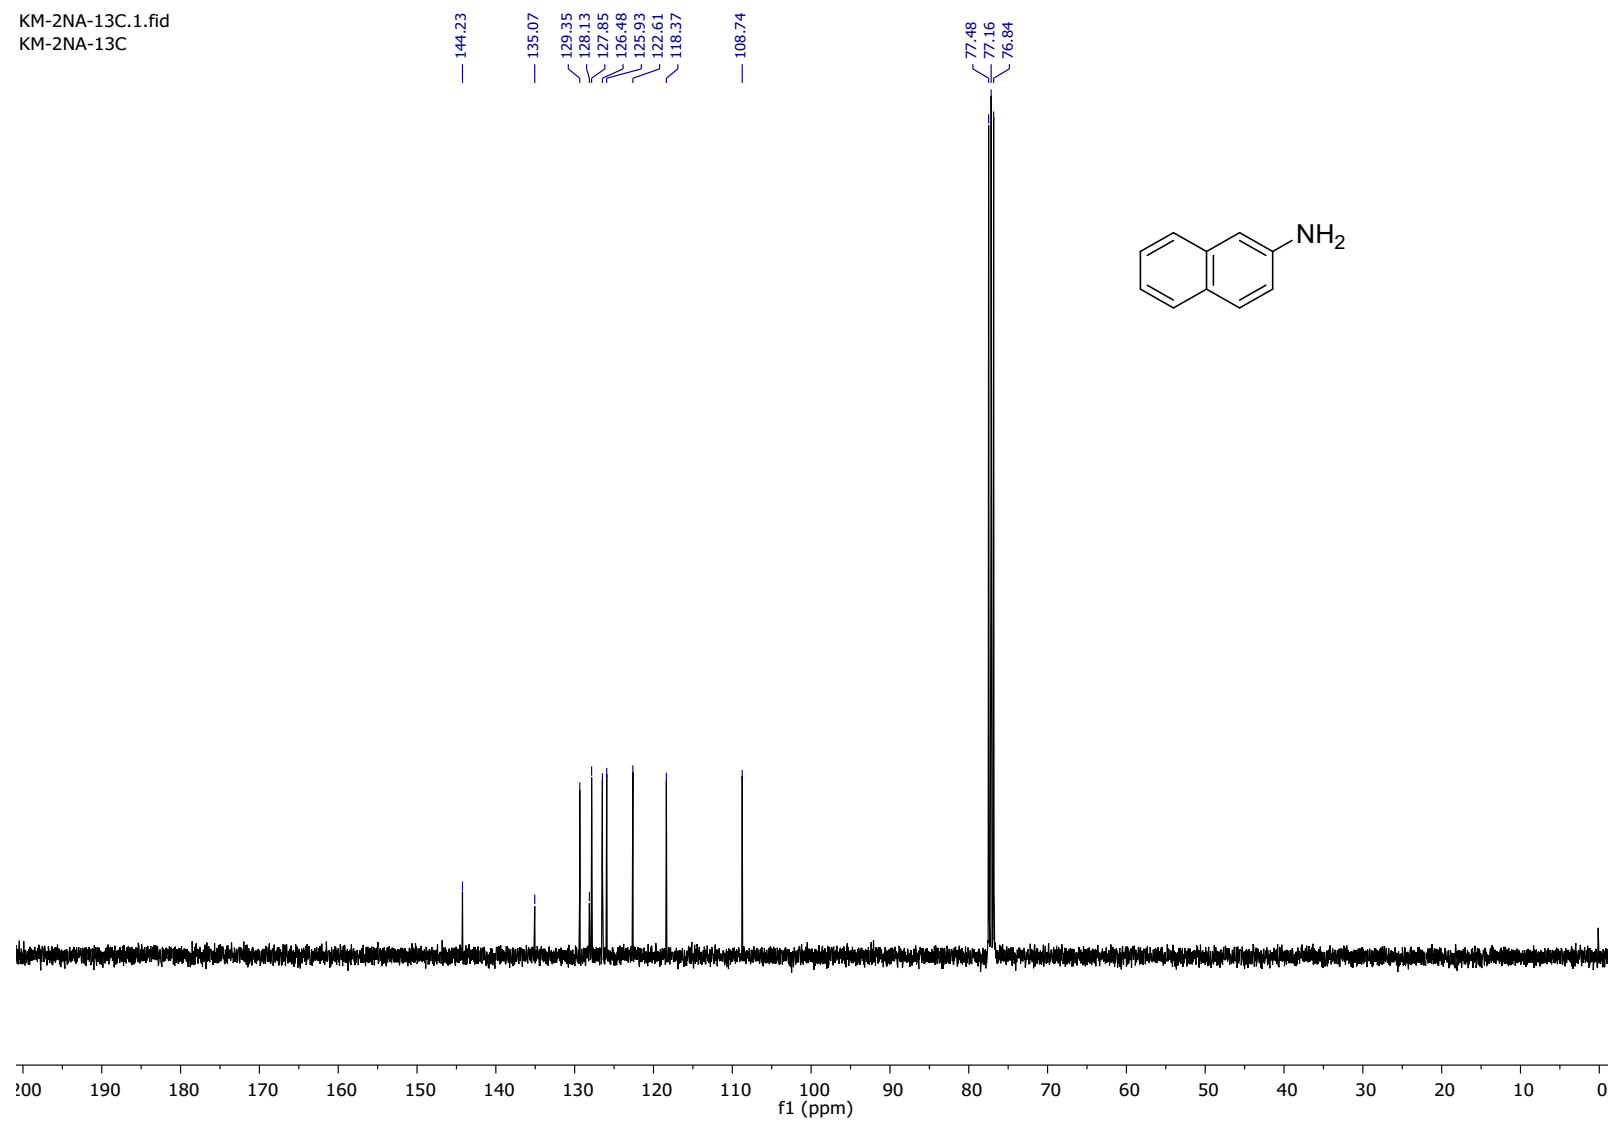

## HRMS spectrum of compound 1b

|                                 |                        |         |                 |                |
|---------------------------------|------------------------|---------|-----------------|----------------|
| SY-Q22 PMS                      | Position               | P1-A1   | Instrument Name | QTOF           |
| SYSTEM (SYSTEM)                 | Inj Vol                | 5       | InjPosition     |                |
| Sample                          | IRM Calibration Status | Success | Data Filename   | SY-Q22 PMS.d   |
| DIRECT MASS_POSITIVE_100_1500.m | Comment                |         | Acquired Time   | 04-Sep-23 09:2 |

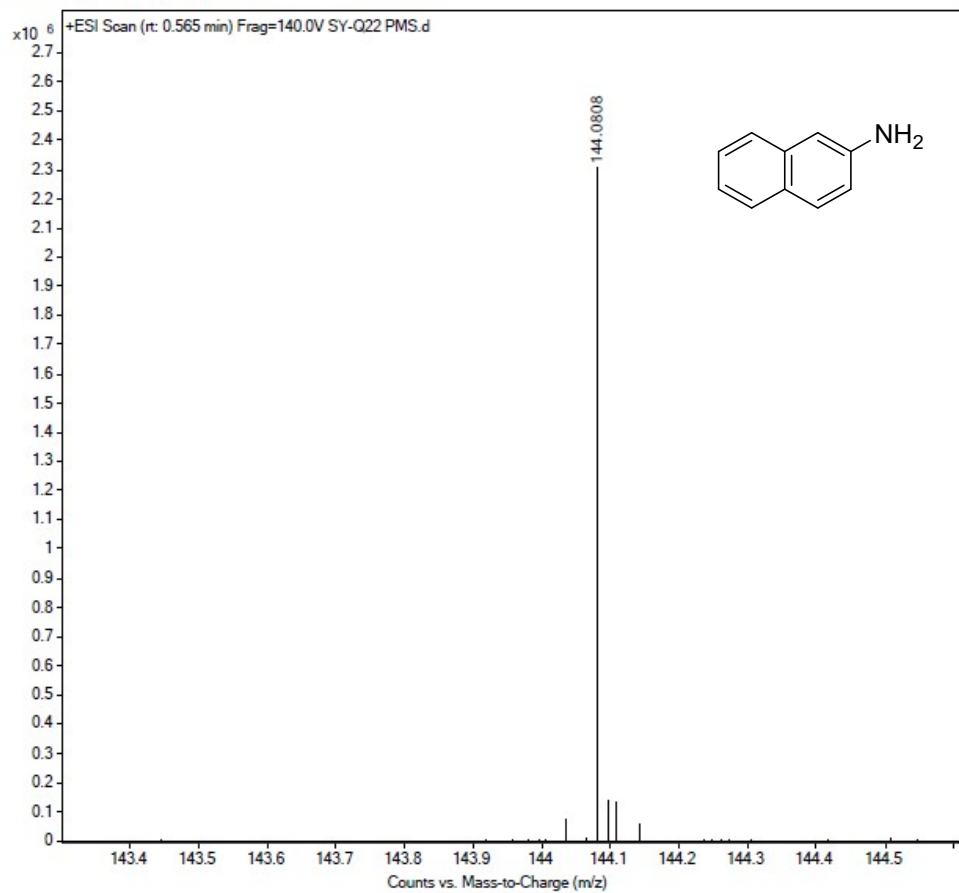

**<sup>1</sup>H NMR (500 MHz, CDCl<sub>3</sub>) spectrum of compound 3a**

ATK-SY-Q1-1H.3.fid — ATK-SY-Q1-1H

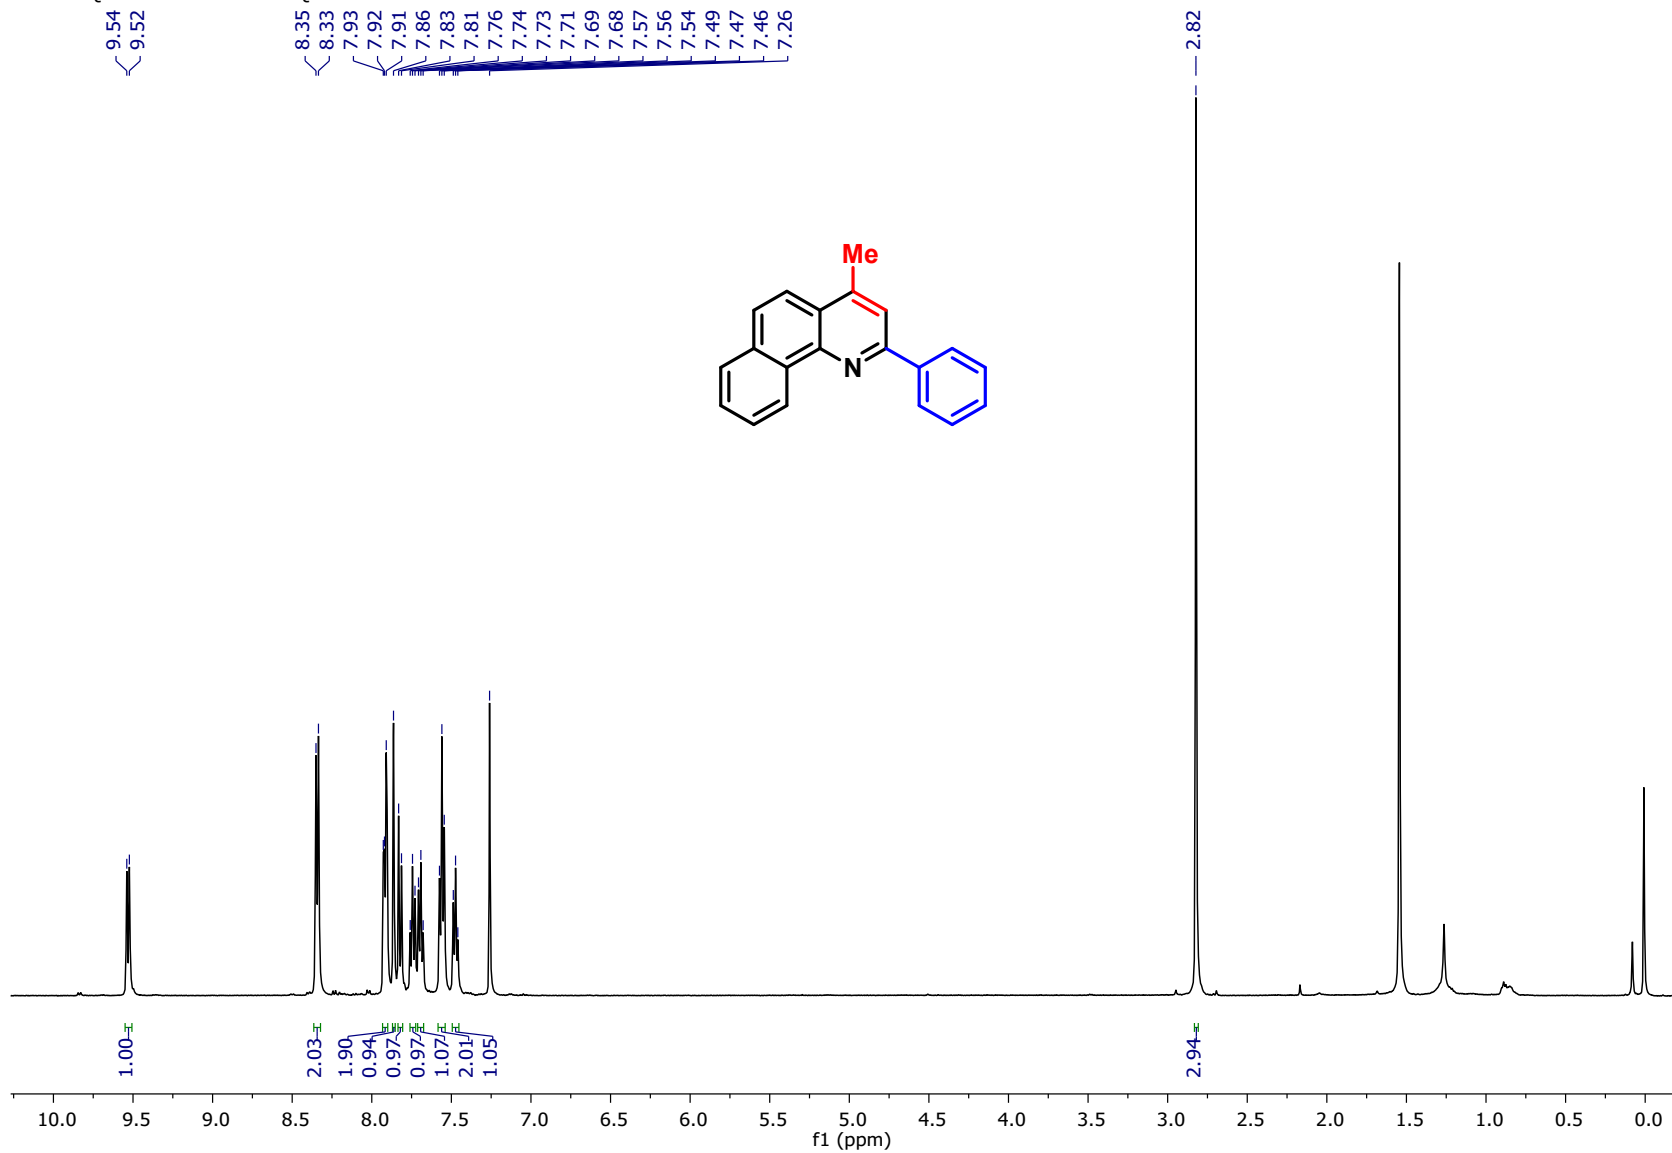

$^{13}\text{C}\{^1\text{H}\}$  NMR (125 MHz,  $\text{CDCl}_3$ ) spectrum of compound 3a

ATK-SY-Q1-13C.1.fid — ATK-SY-Q1-13C

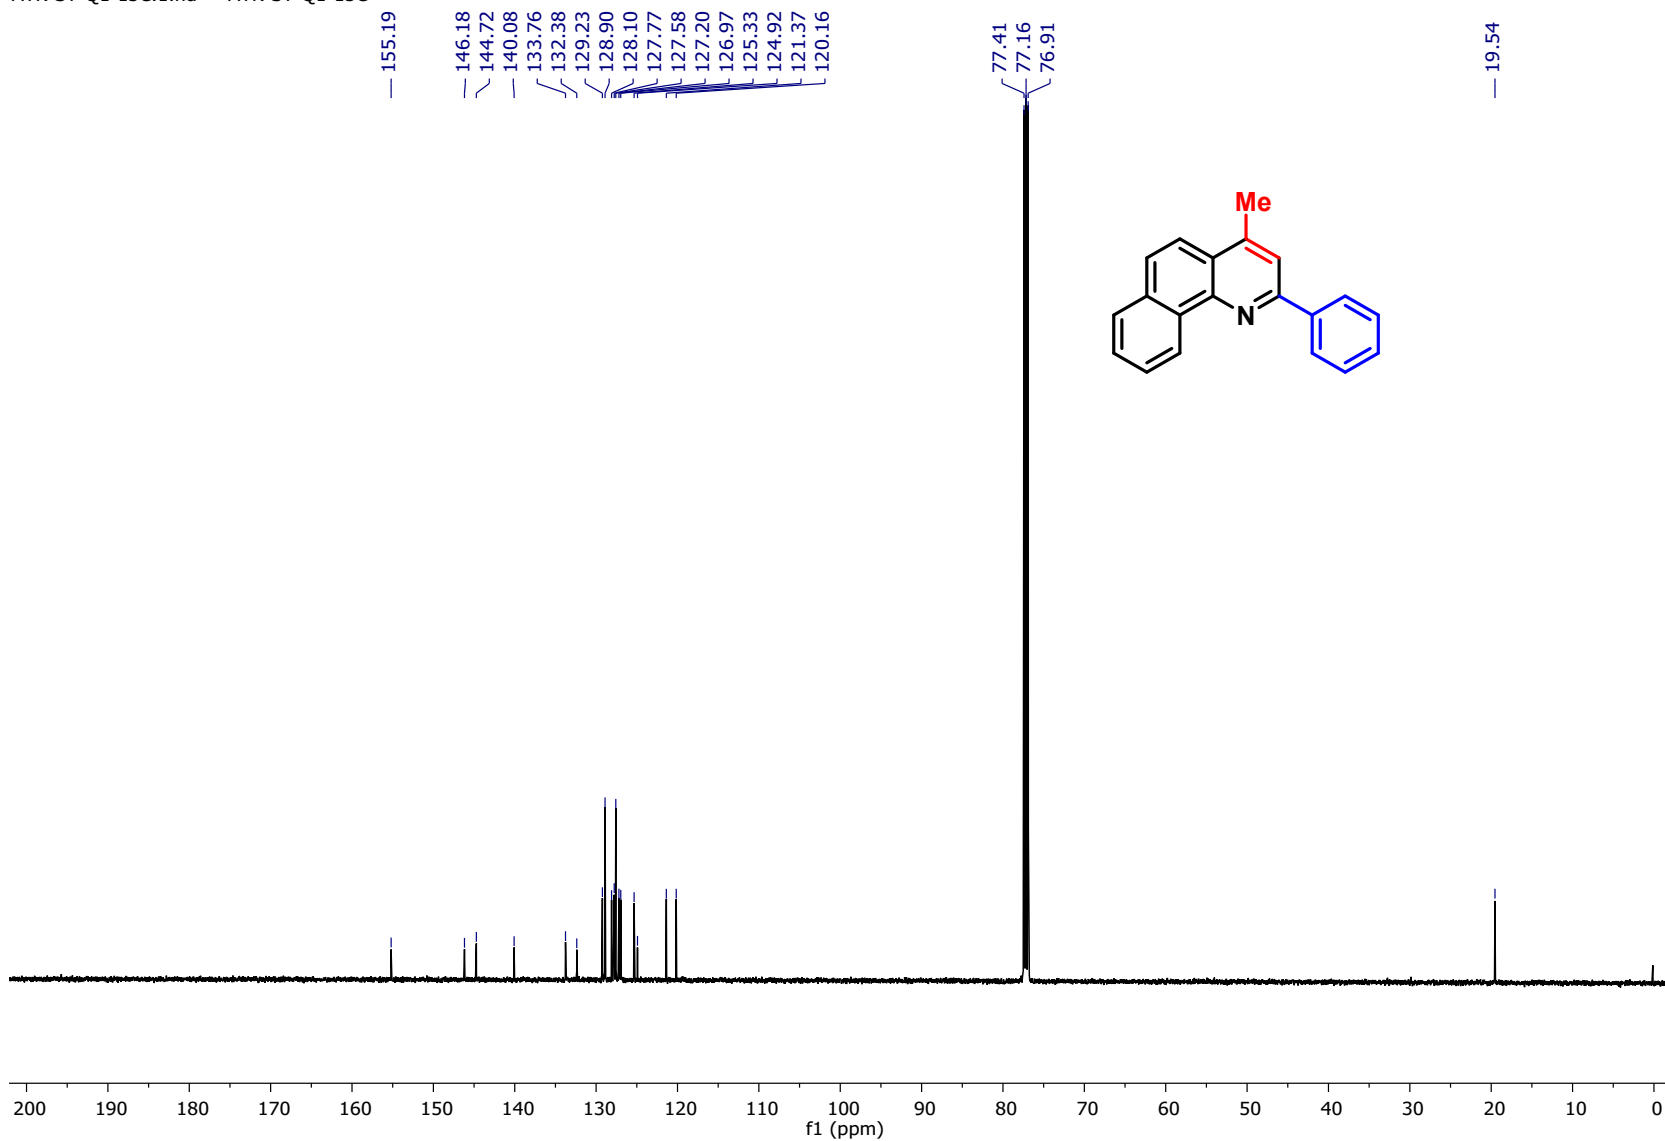

## HRMS spectrum of compound 3a

|             |                      |                        |         |                 |                                   |
|-------------|----------------------|------------------------|---------|-----------------|-----------------------------------|
| Sample Name | ATK-Q1               | Position               | P1-D3   | Instrument Name | Instrument 1                      |
| User Name   |                      | Inj Vol                | 10      | InjPosition     |                                   |
| Sample Type | Sample               | IRM Calibration Status | Success | Data Filename   | ATK-Q1_016.d                      |
| ACQ Method  | FULL_SCAN-POSITIVE.m | Comment                |         | Acquired Time   | 27-Nov-22 08:36:18 PM (UTC+05:30) |

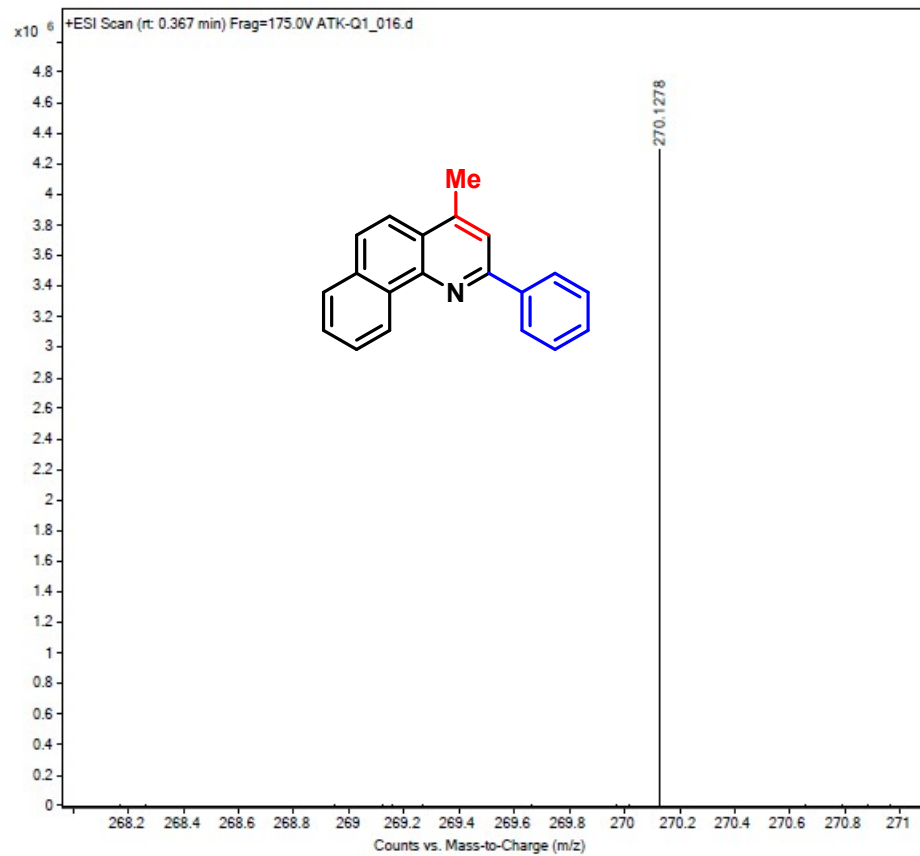

**$^1\text{H}$  NMR (500 MHz,  $\text{CDCl}_3$ ) spectrum of compound 3b**

ATK-SY-Q2-1H.1.fid — ATK-SY-Q2-1H

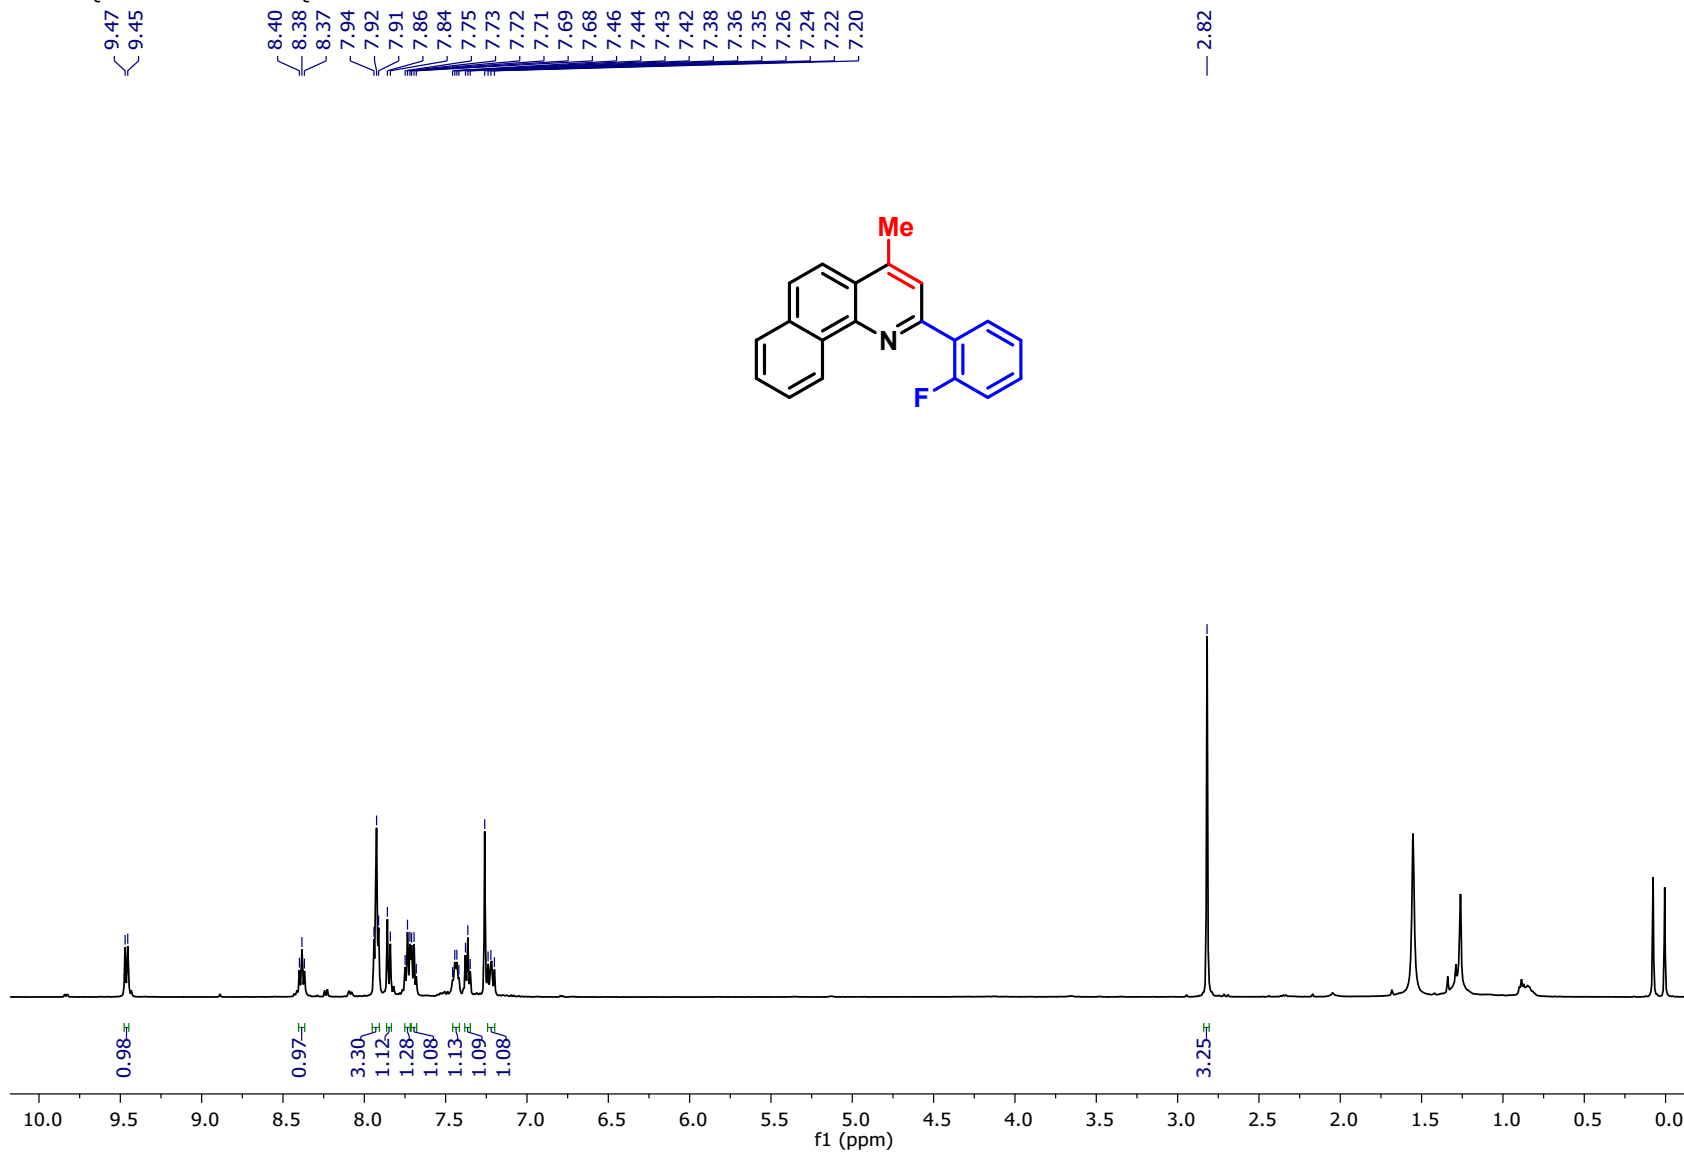



**$^{13}\text{C}\{^1\text{H}\}$  NMR (125 MHz,  $\text{CDCl}_3$ ) spectrum of compound 3b**

ATK-SY-Q2-13C.1.fid — ATK-SY-Q2-13C

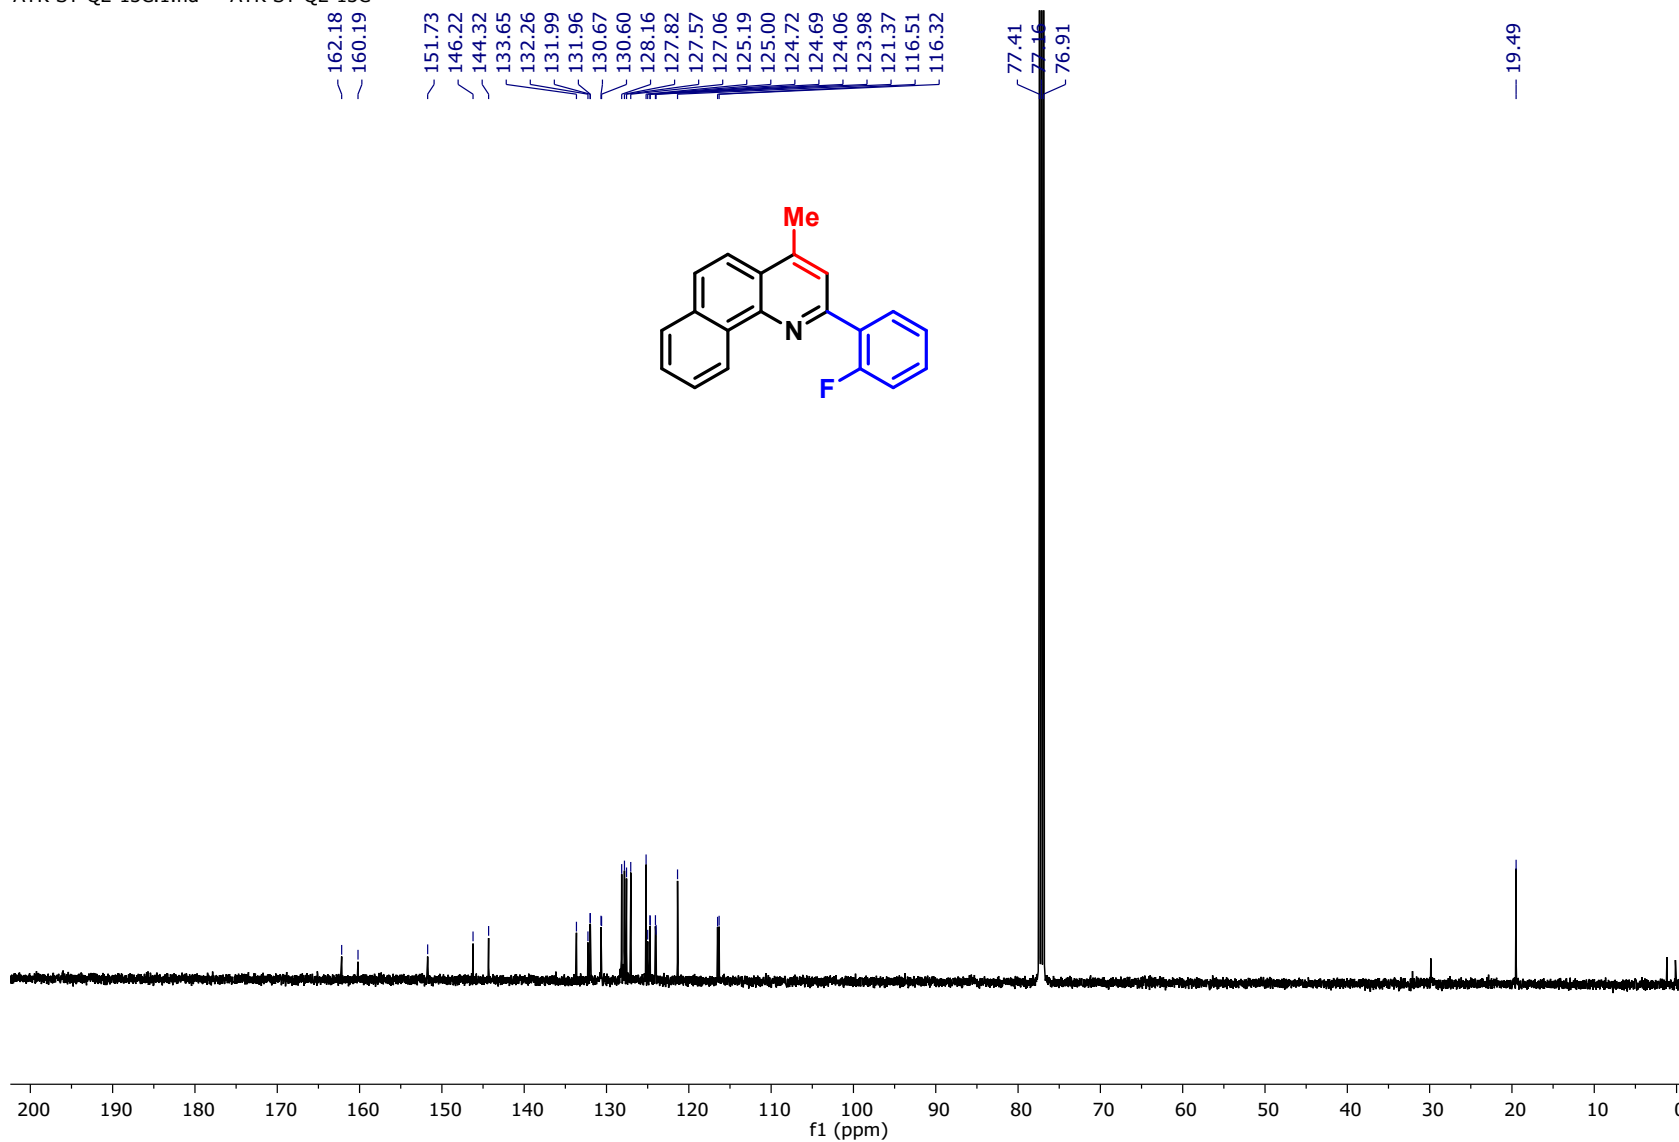

## HRMS spectrum of compound 3b

Sample Name  
User Name  
Sample Type  
ACQ Method

ATK\_SY\_Q2\_POS  
Sample  
FULL\_SCAN-POSITIVE.m

Position P1-D2  
Inj Vol 10  
IRM Calibration Status Success  
Comment

Instrument Name Instrument 1  
InjPosition  
Data Filename ATK\_SY\_Q2\_POS\_006.d  
Acquired Time 28-Feb-23 05:11:18 PM (UTC+05:30)

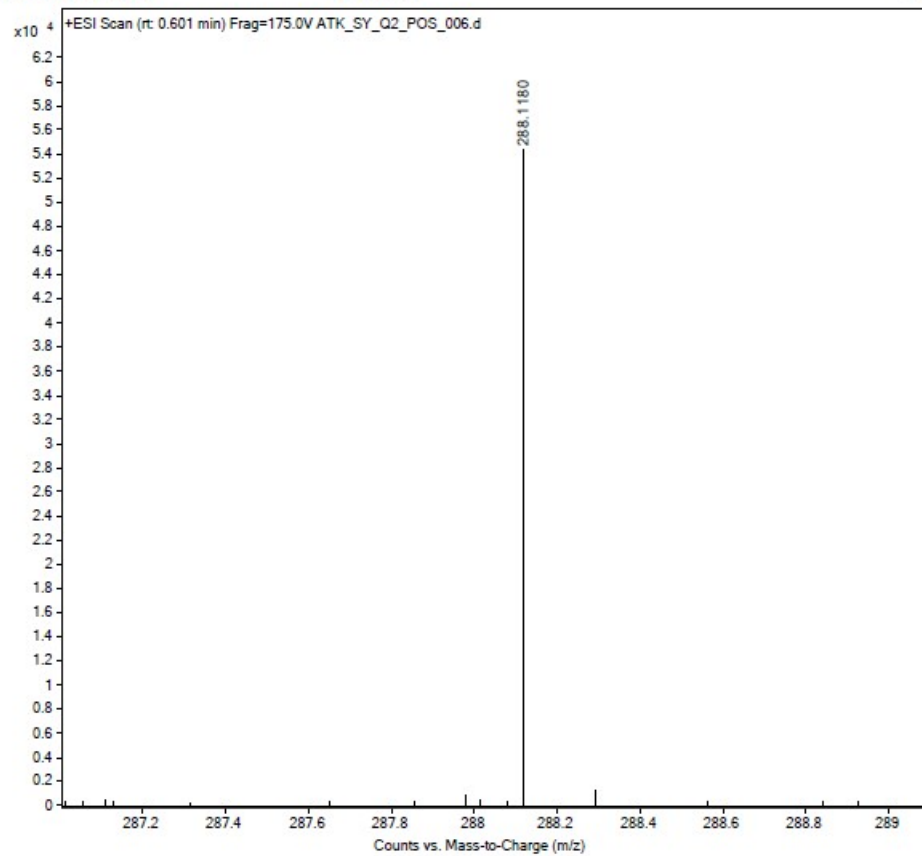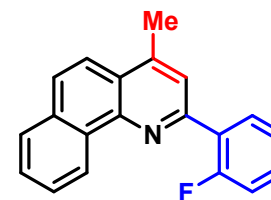

**<sup>1</sup>H NMR (400 MHz, CDCl<sub>3</sub>) spectrum of compound 3c**

ATK-SY-Q3-1H.1.fid — ATK-SY-Q3-1H

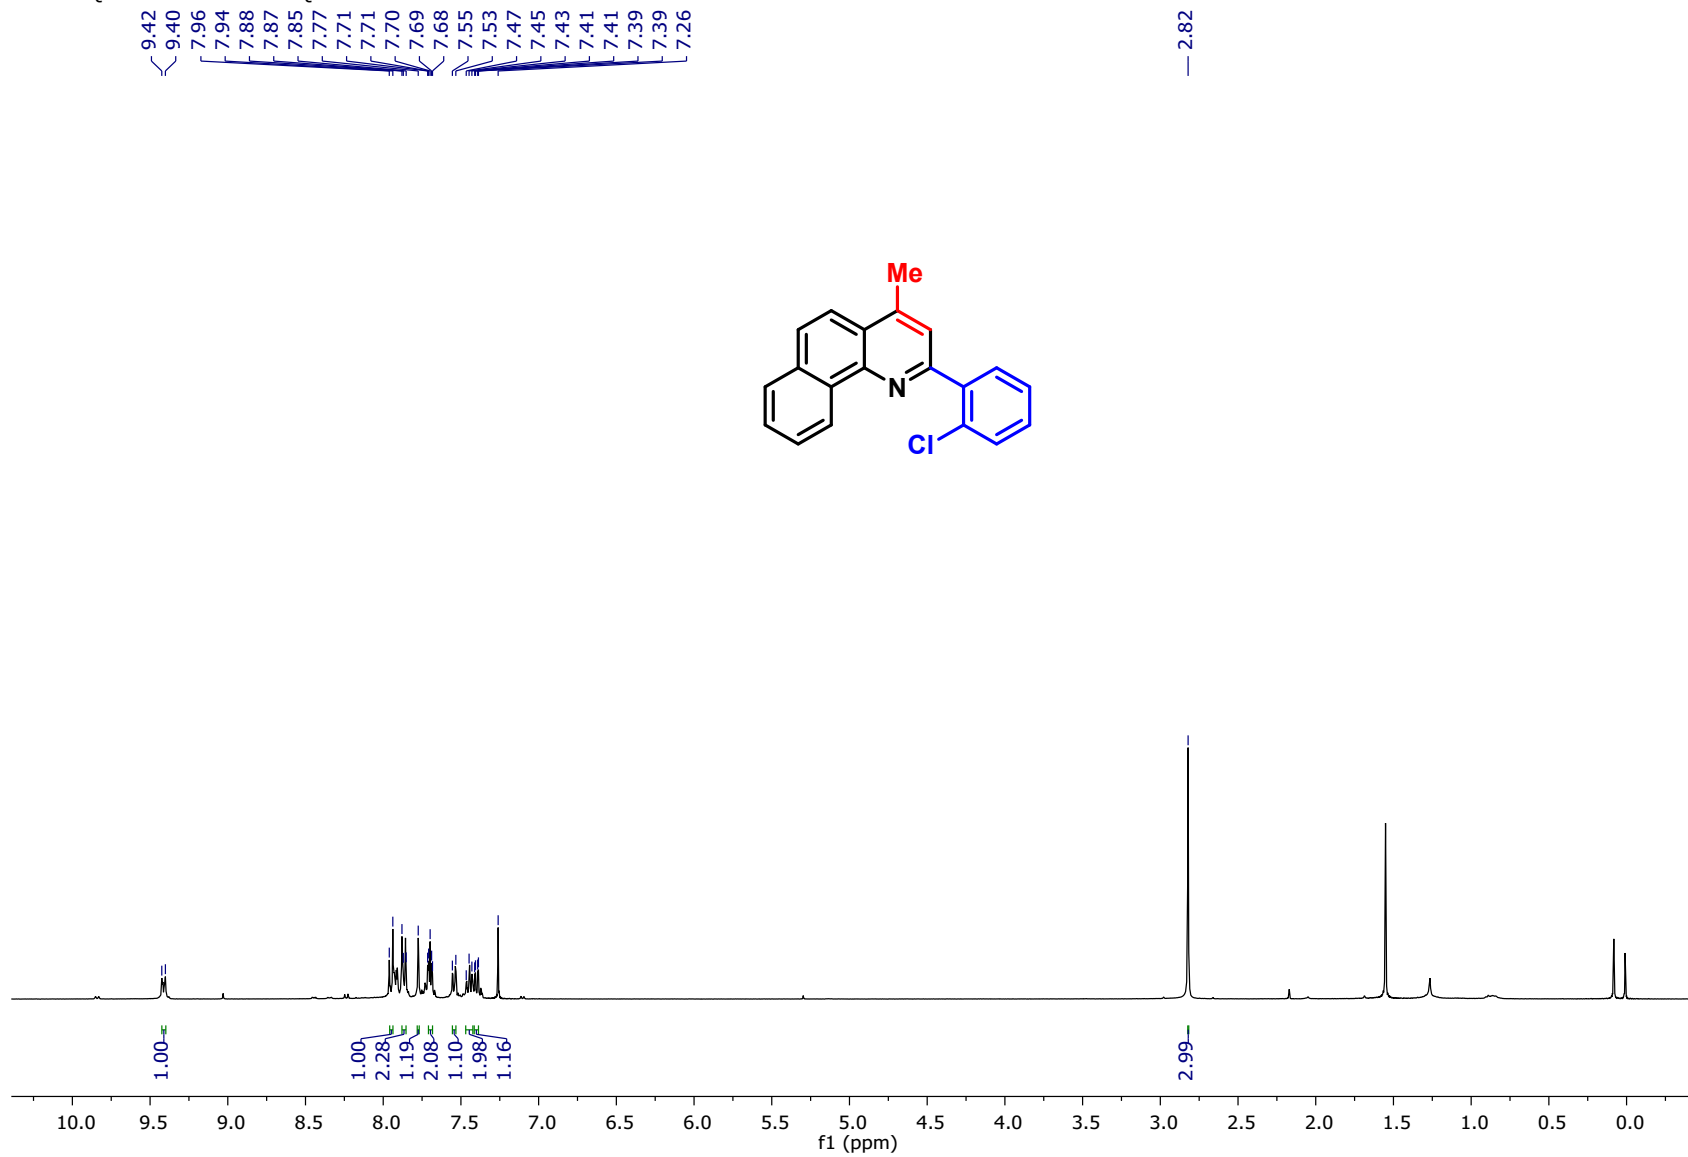

$^{13}\text{C}\{^1\text{H}\}$  NMR (100 MHz,  $\text{CDCl}_3$ ) spectrum of compound **3c**

ATK-SY-Q3-13C.10.fid  
ATK-SY-Q3-13C

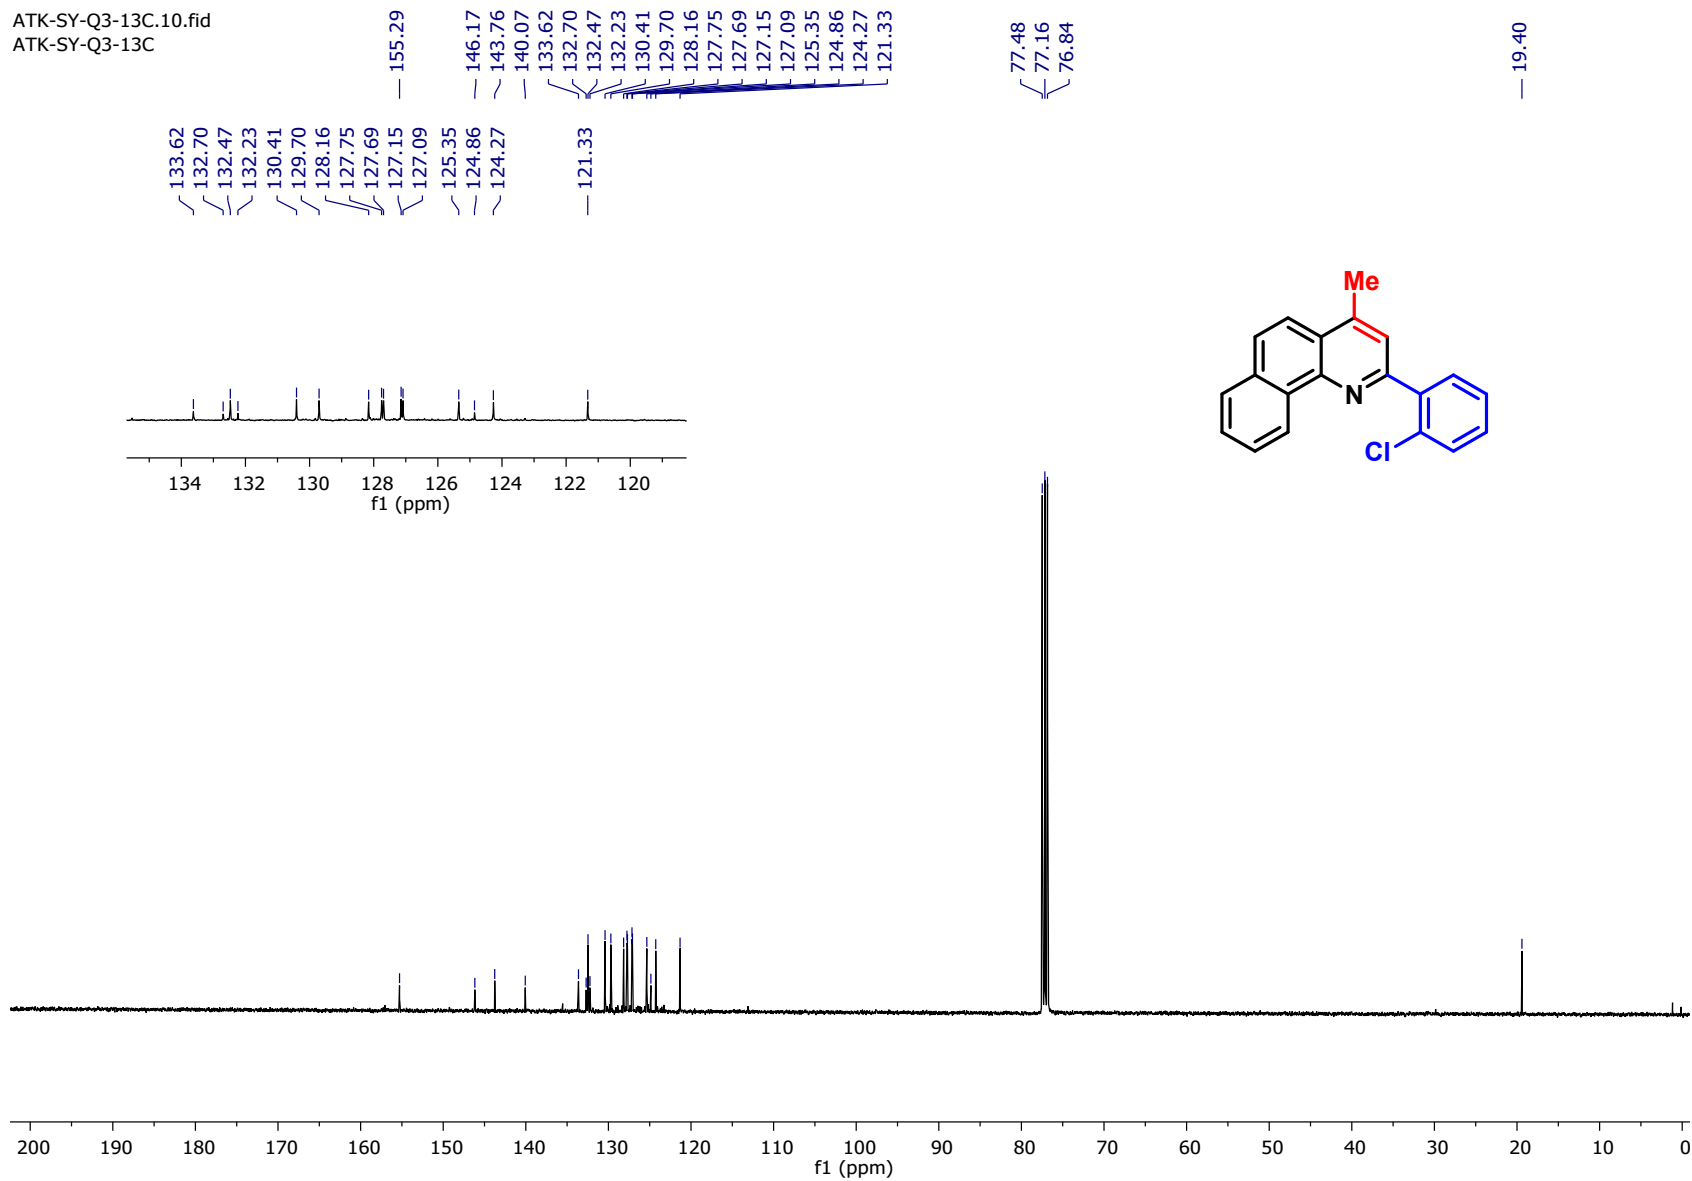

## HRMS spectrum of compound 3c

|             |                      |                        |         |                 |                                   |
|-------------|----------------------|------------------------|---------|-----------------|-----------------------------------|
| Sample Name | ATK_SY_Q3_POS        | Position               | P1-D9   | Instrument Name | Instrument 1                      |
| User Name   |                      | Inj Vol                | 10      | InjPosition     |                                   |
| Sample Type | Sample               | IRM Calibration Status | Success | Data Filename   | ATK_SY_Q3_POS_014.d               |
| ACQ Method  | FULL SCAN-POSITIVE.m | Comment                |         | Acquired Time   | 28-Feb-23 05:24:00 PM (UTC+05:30) |

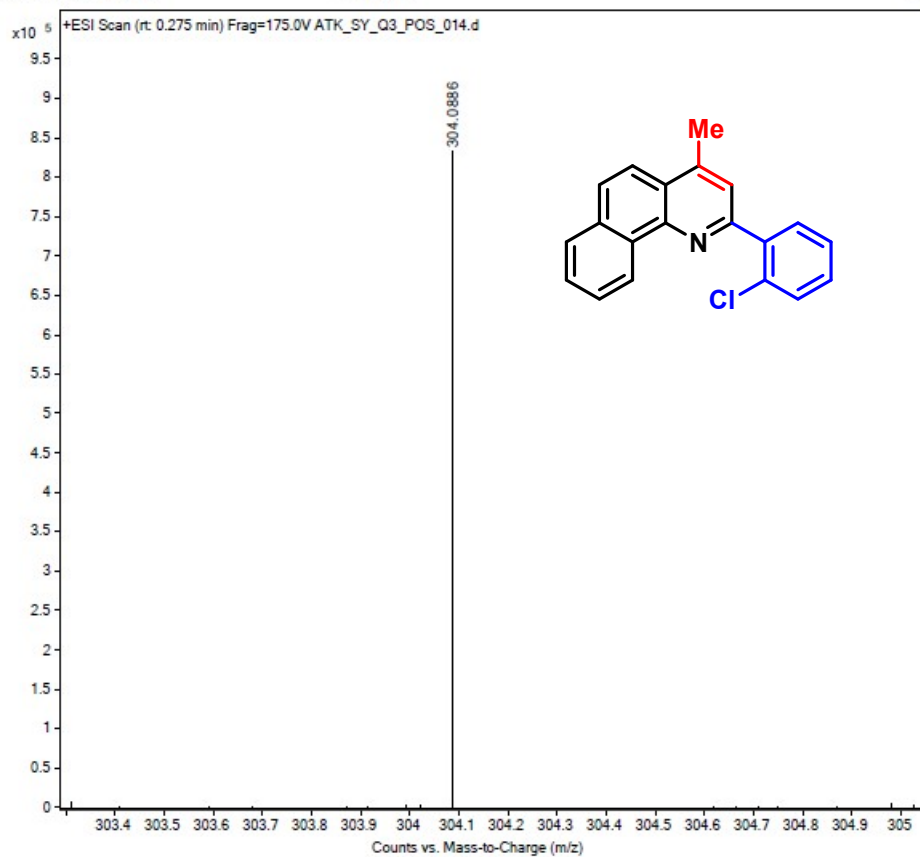

# <sup>1</sup>H NMR (500 MHz, CDCl<sub>3</sub>) spectrum of compound 3d

ATK-SY-Q47-1H.1.fid — ATK-SY-Q47-1H

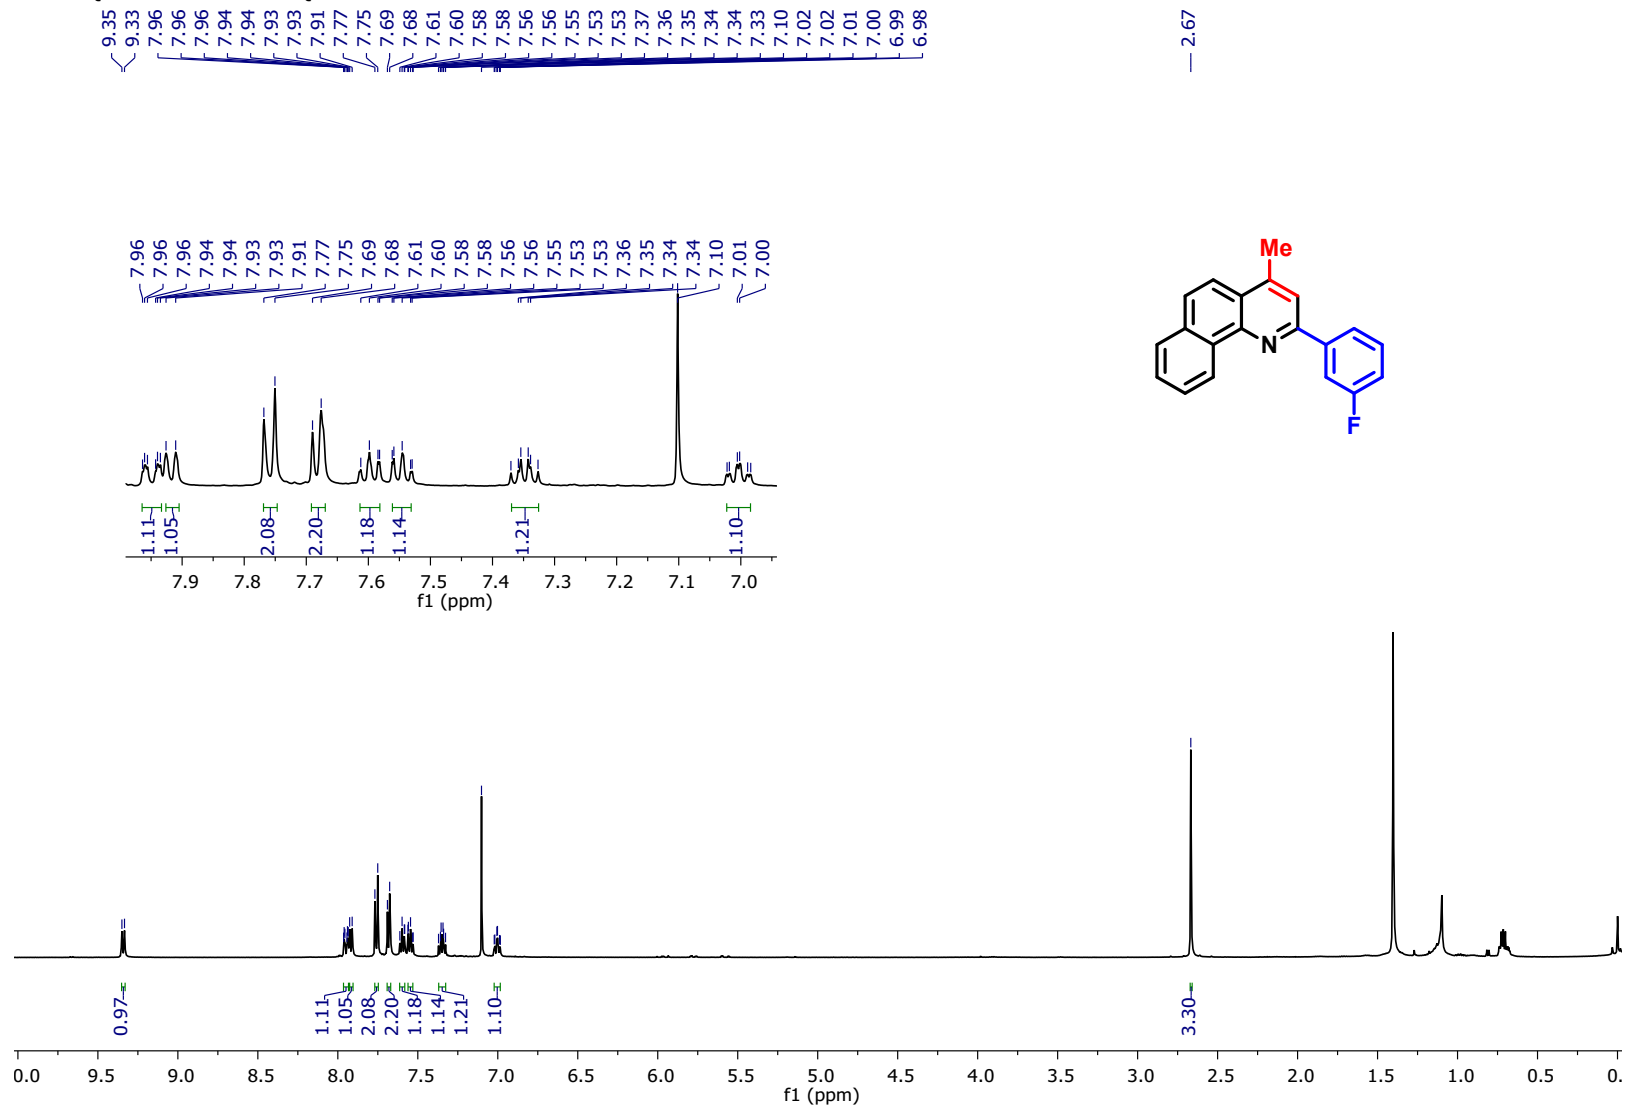

**$^{13}\text{C}\{^1\text{H}\}$  NMR (125 MHz,  $\text{CDCl}_3$ ) spectrum of compound 3d**

ATK-SY-Q47-13C.5.fid — ATK-SY-Q47-13C

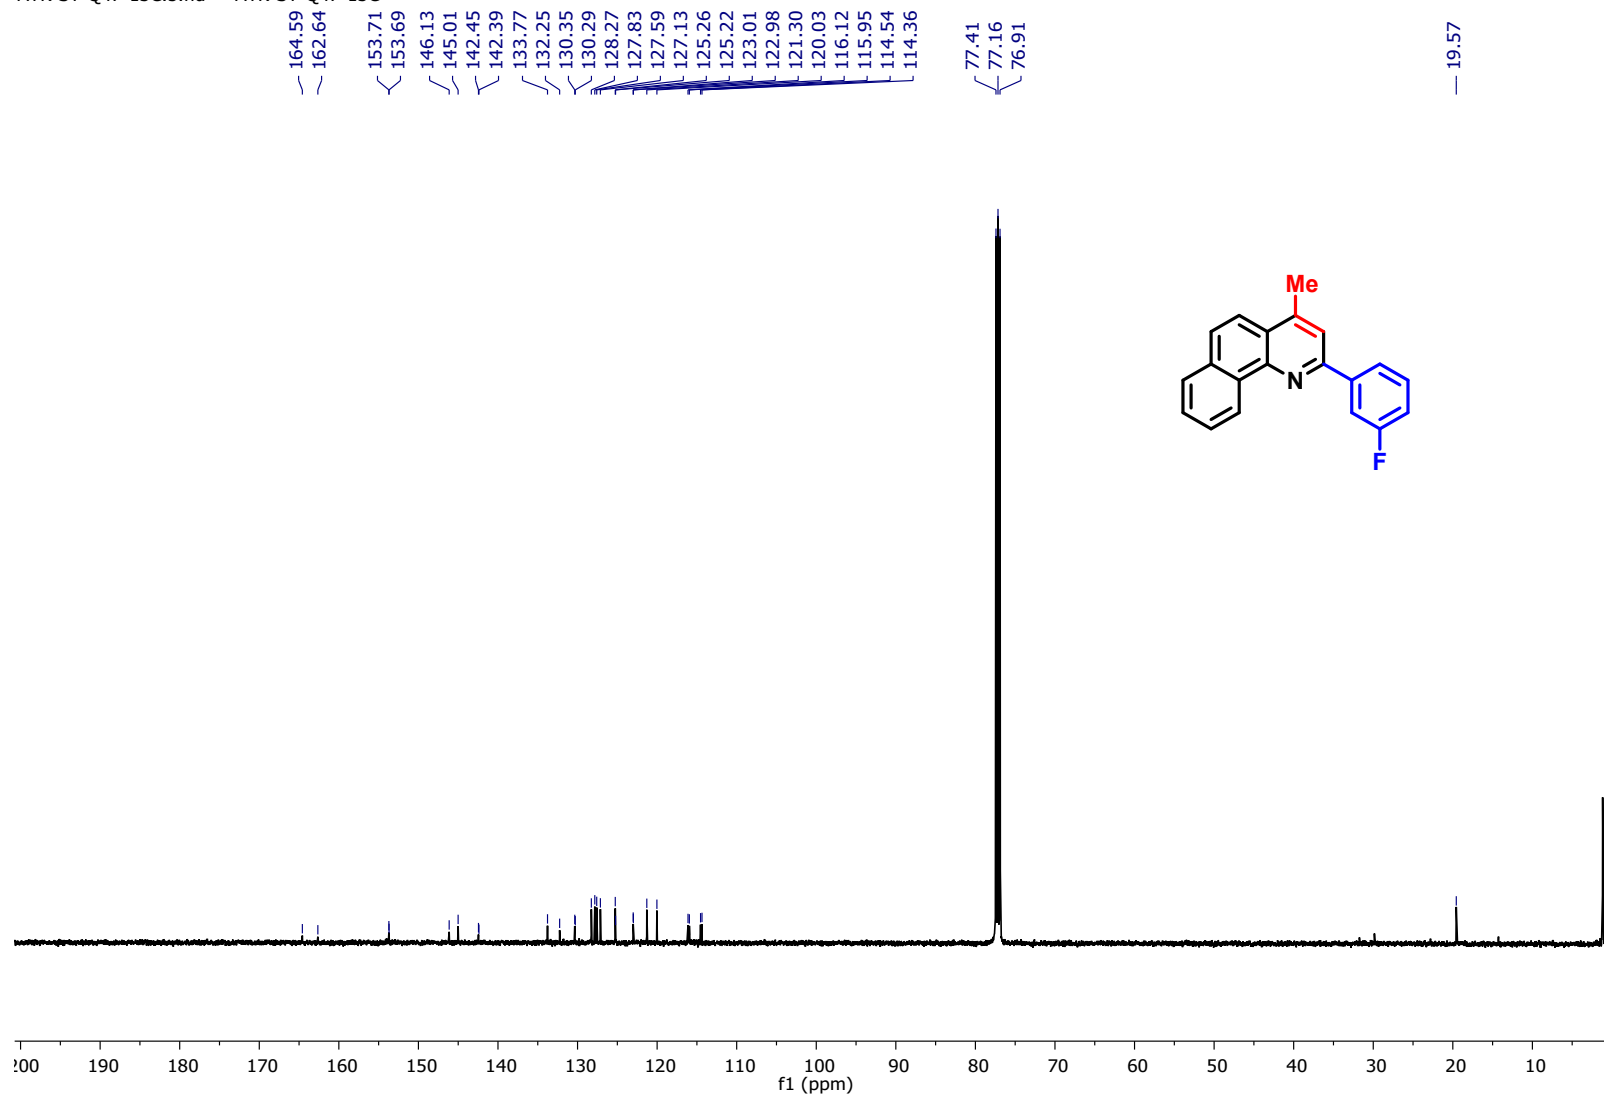

**$^{19}\text{F}$  NMR (471 MHz,  $\text{CDCl}_3$ ) spectrum of compound 3d**

ATK-SY-Q47-19F.3.fid — ATK-SY-Q47-19F

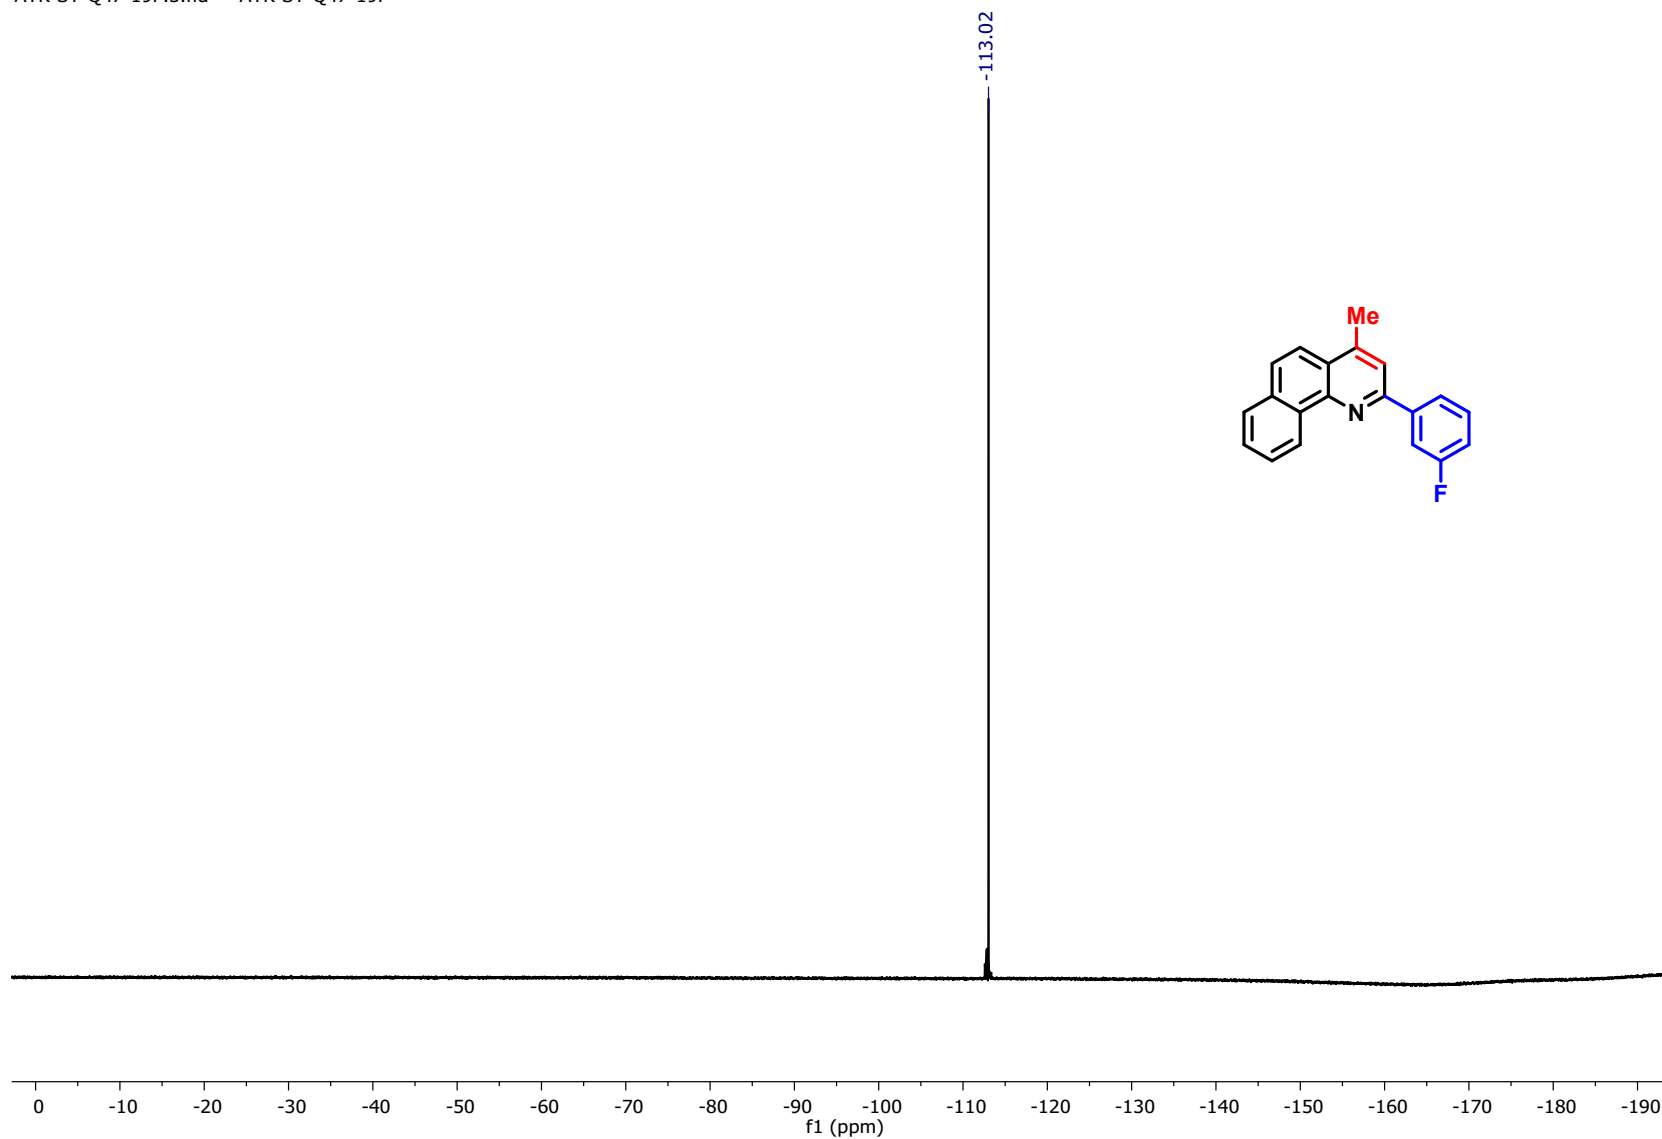



## HRMS spectrum of compound 3d

Sample Name  
User Name  
Sample Type  
ACQ Method

Sample25  
SYSTEM (SYSTEM)  
Sample  
DIRECT MASS\_POSITIVE\_01\_1.m  
Position  
Inj Vol  
IRM Calibration Status  
Comment  
P1-C3  
5  
Success

Instrument Name  
InjPosition  
Data Filename  
Acquired Time  
QTOF  
5  
SY-Q47.d  
13-Jul-23 11:47:31 AM (UTC+05:30)

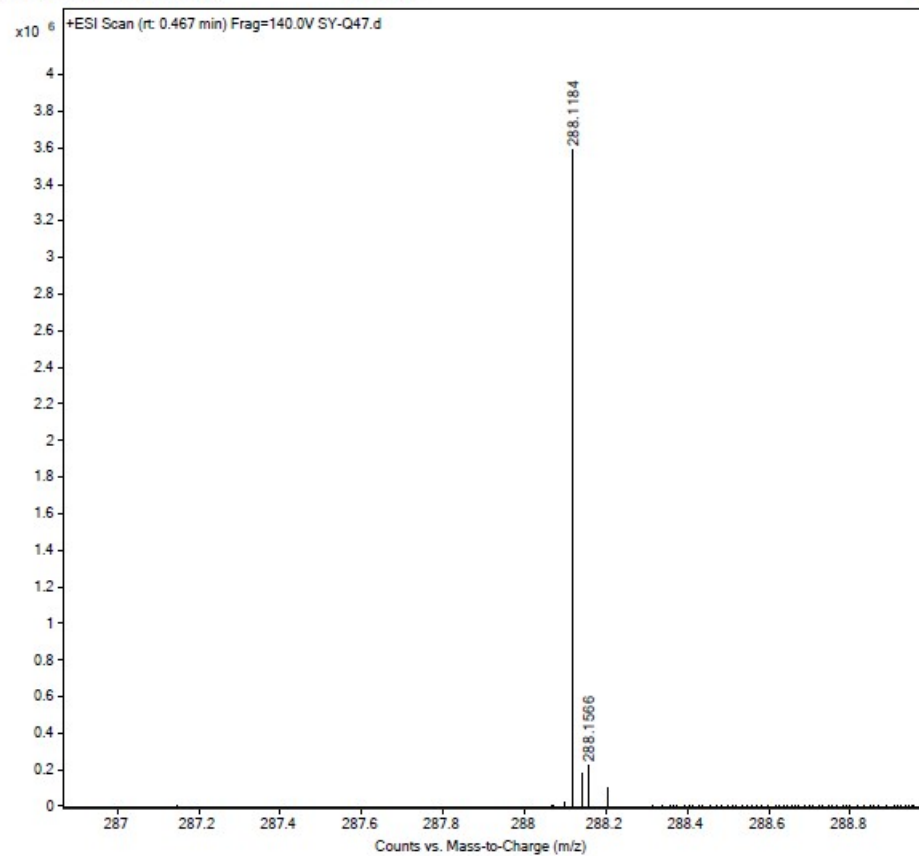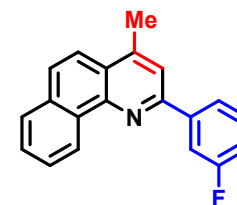

<sup>1</sup>H NMR (500 MHz, CDCl<sub>3</sub>) spectrum of compound 3e

ATK-SY-Q4-1H.1.fid — ATK-SY-Q4-1H

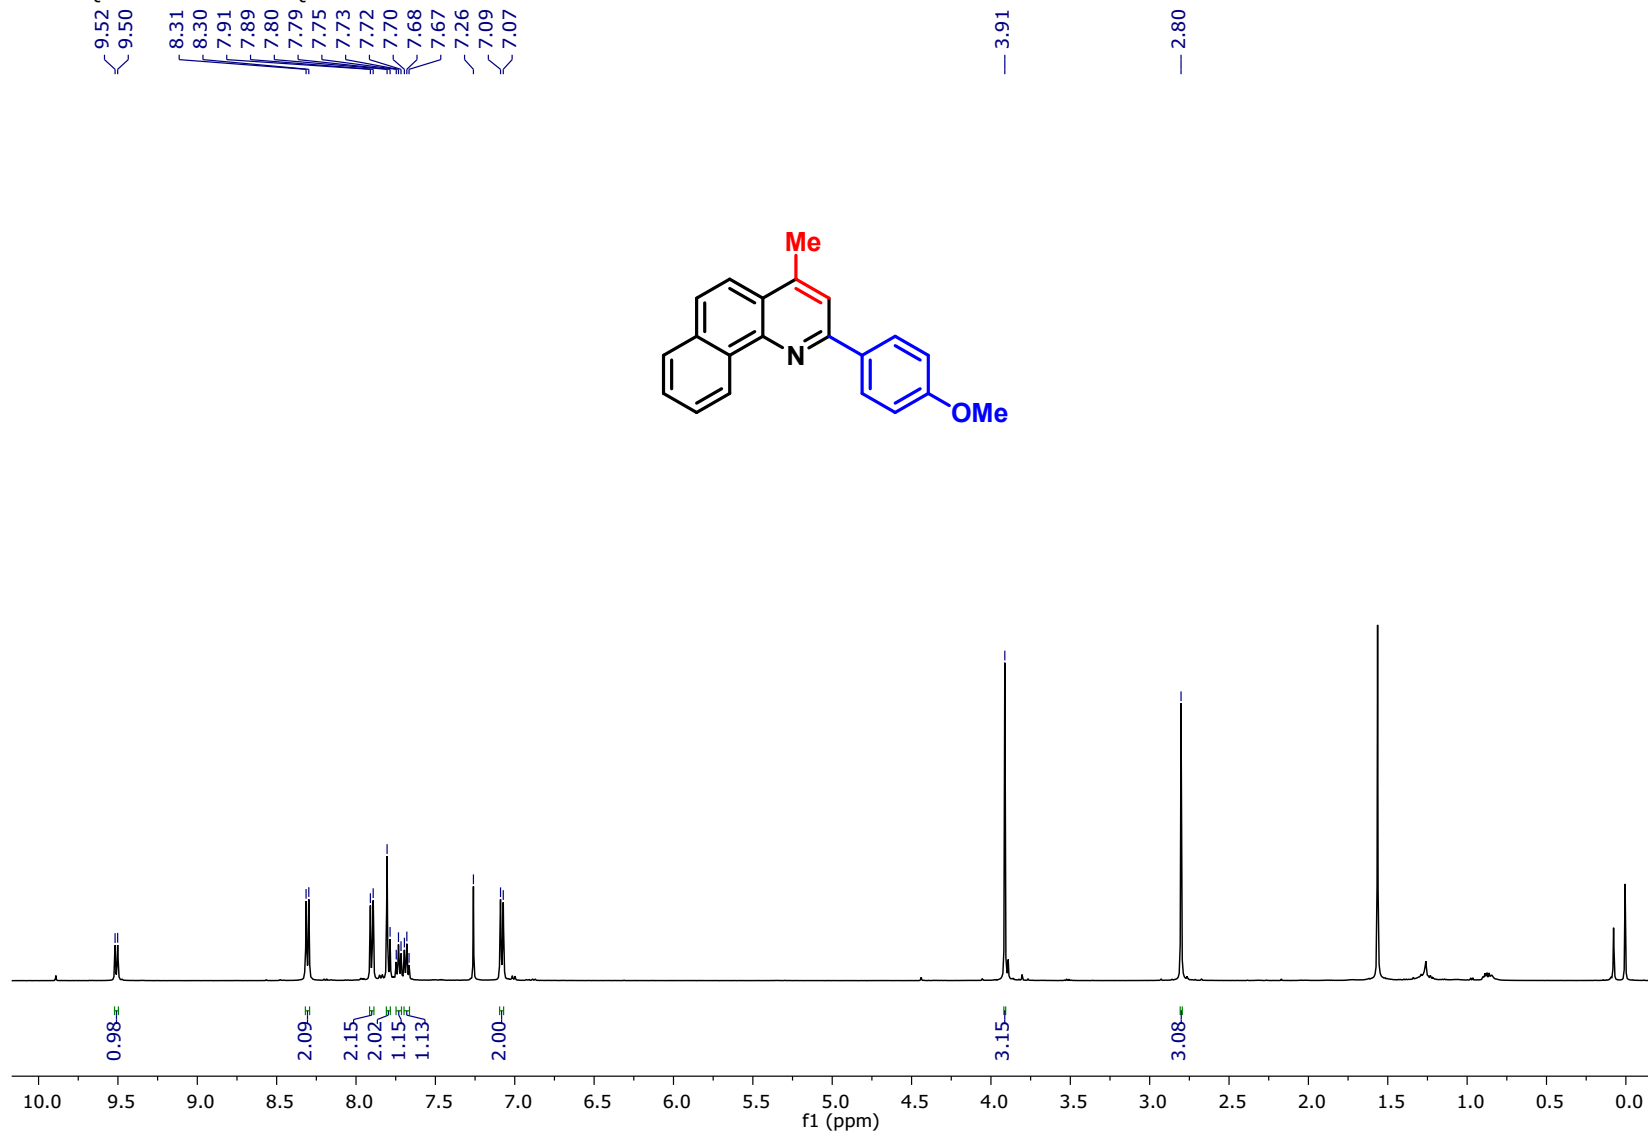

$^{13}\text{C}\{^1\text{H}\}$  NMR (125 MHz,  $\text{CDCl}_3$ ) spectrum of compound 3e

ATK-SY-Q4-13C.3.fid — ATK-SY-Q4-13C

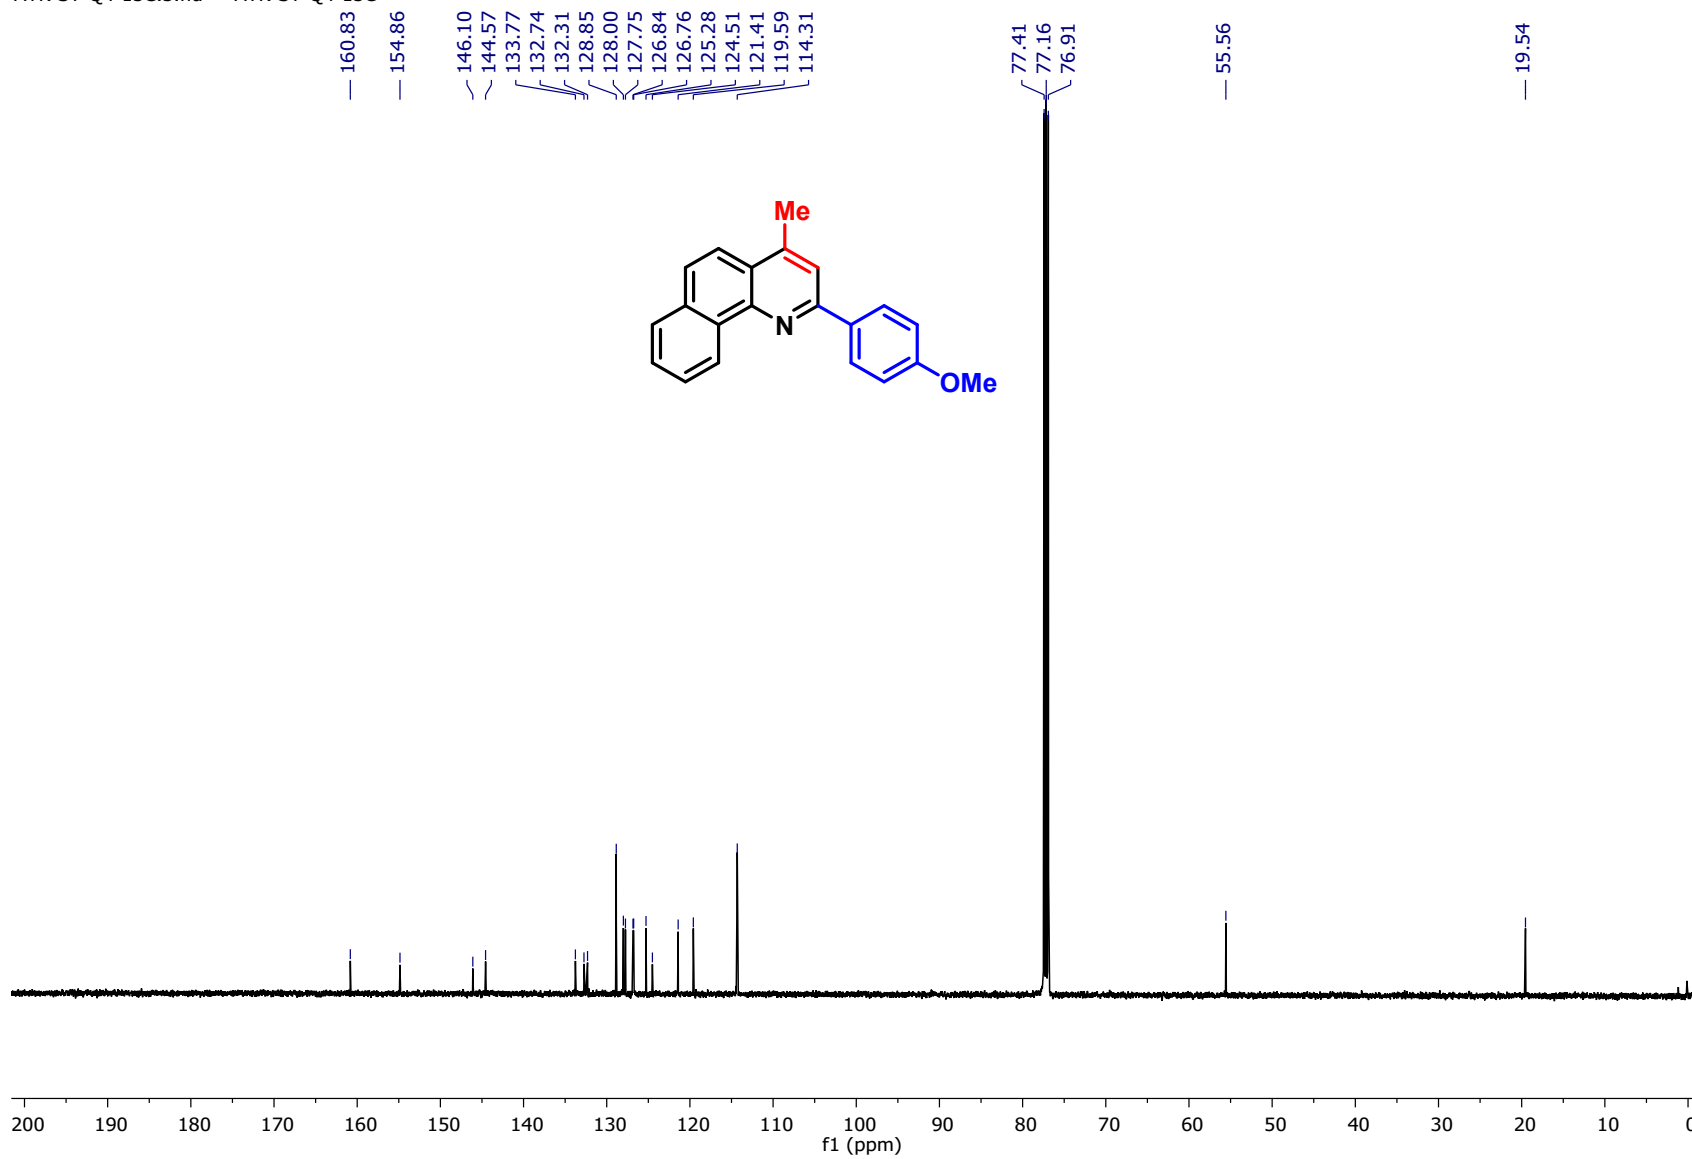

## HRMS spectrum of compound 3e

|             |                      |                        |         |                 |                                   |
|-------------|----------------------|------------------------|---------|-----------------|-----------------------------------|
| Sample Name | ATK_SY_Q4_POS        | Position               | P1-D5   | Instrument Name | Instrument 1                      |
| User Name   |                      | Inj Vol                | 10      | InjPosition     |                                   |
| Sample Type | Sample               | IRM Calibration Status | Success | Data Filename   | ATK_SY_Q4_POS_009.d               |
| ACQ Method  | FULL SCAN-POSITIVE.m | Comment                |         | Acquired Time   | 28-Feb-23 05:16:05 PM (UTC+05:30) |

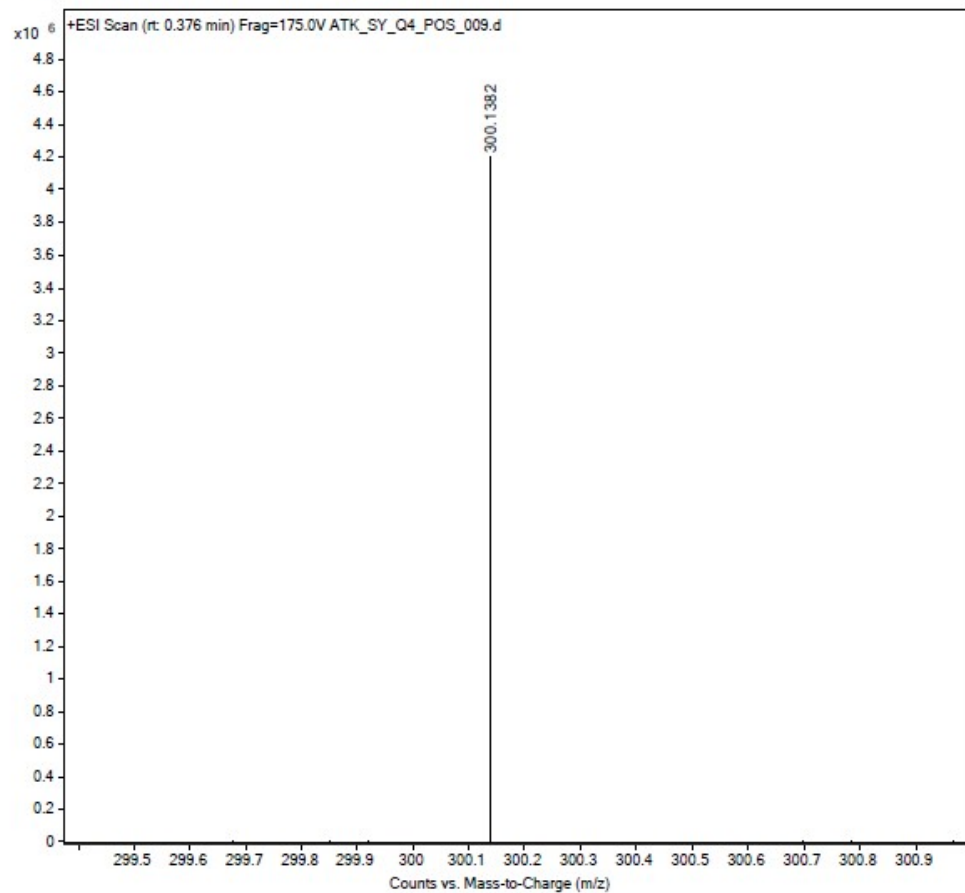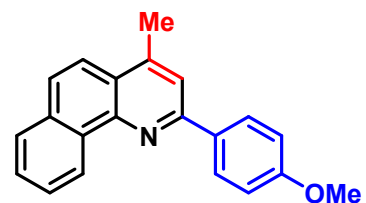

**<sup>1</sup>H NMR (500 MHz, CDCl<sub>3</sub>) spectrum of compound 3f**

ATK-SY-Q7-1H.3.fid — ATK-SY-Q7-1H

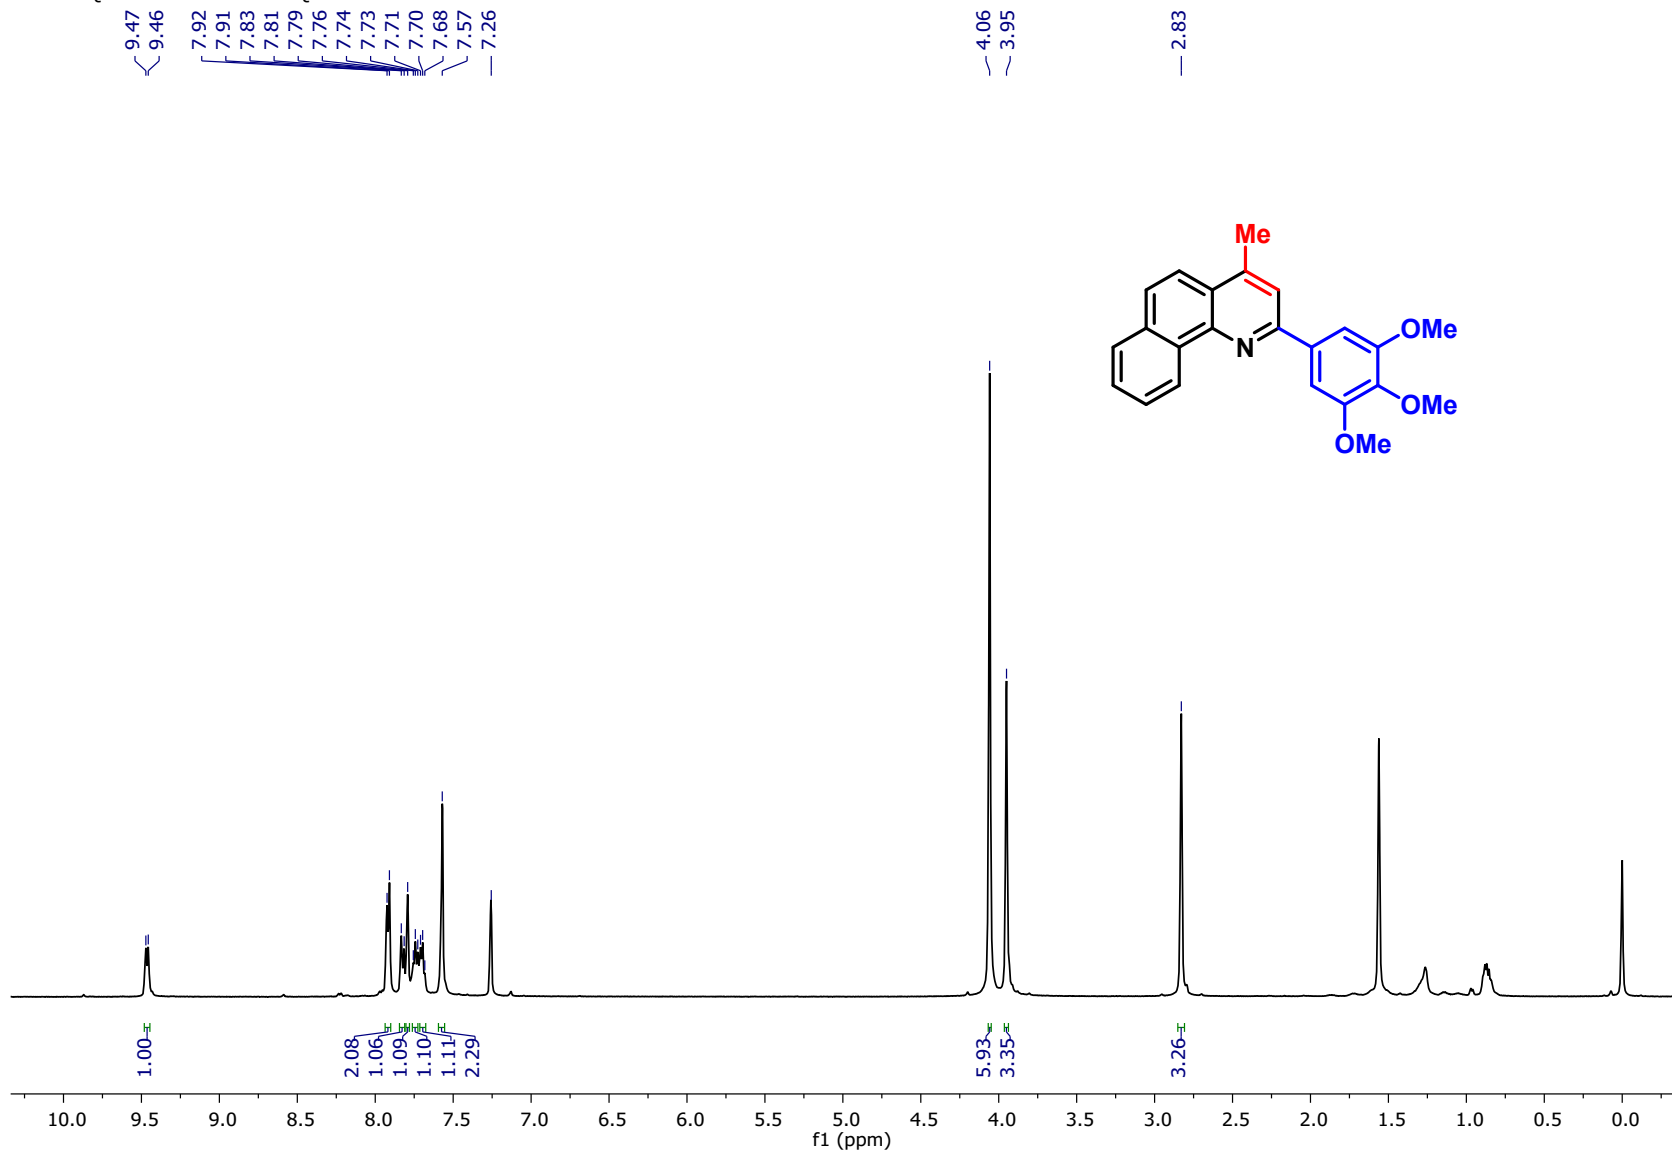

**$^{13}\text{C}\{^1\text{H}\}$  NMR (125 MHz,  $\text{CDCl}_3$ ) spectrum of compound 3f**

ATK-SY-Q7-13C.1.fid — ATK-SY-Q7-13C

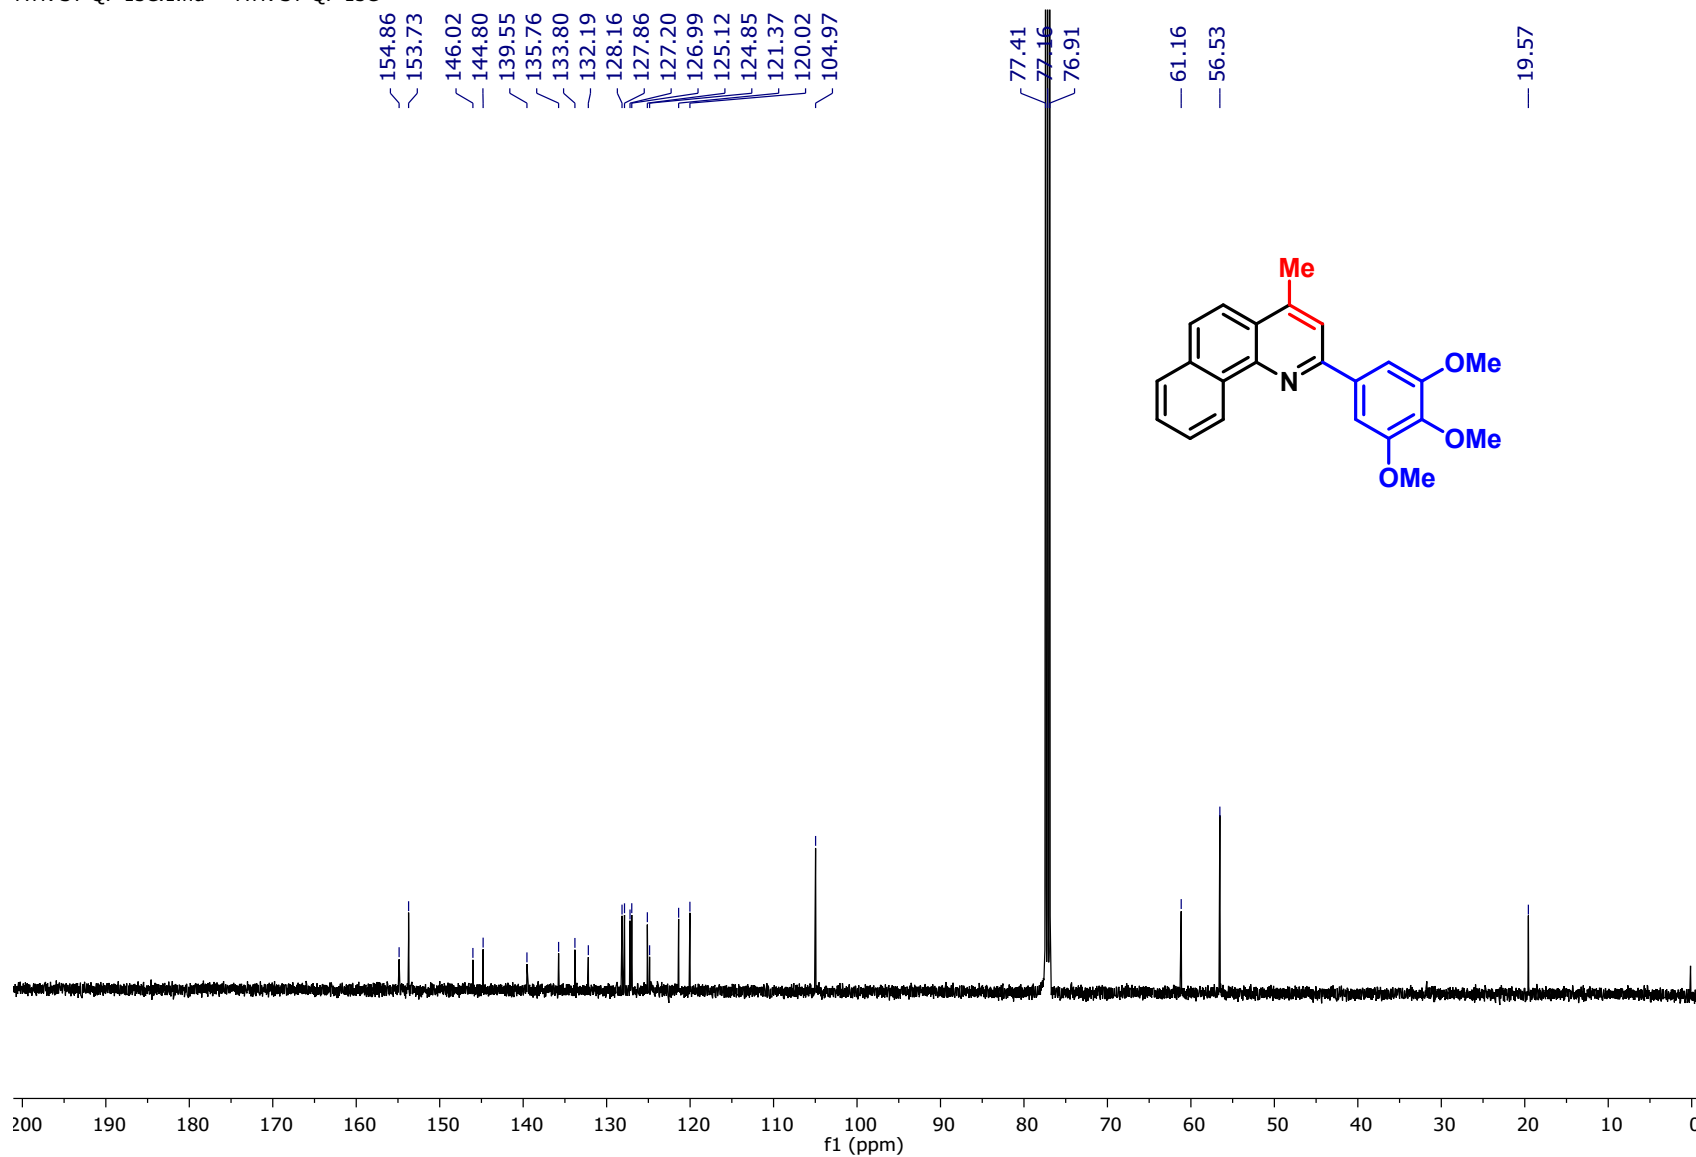

## HRMS spectrum of compound 3f

|             |                      |                        |         |                 |                                   |
|-------------|----------------------|------------------------|---------|-----------------|-----------------------------------|
| Sample Name | ATK_SY_Q7_POS        | Position               | P1-D6   | Instrument Name | Instrument 1                      |
| User Name   |                      | Inj Vol                | 10      | InjPosition     |                                   |
| Sample Type | Sample               | IRM Calibration Status | Success | Data Filename   | ATK_SY_Q7_POS_010.d               |
| ACQ Method  | FULL SCAN-POSITIVE.m | Comment                |         | Acquired Time   | 28-Feb-23 05:17:39 PM (UTC+05:30) |

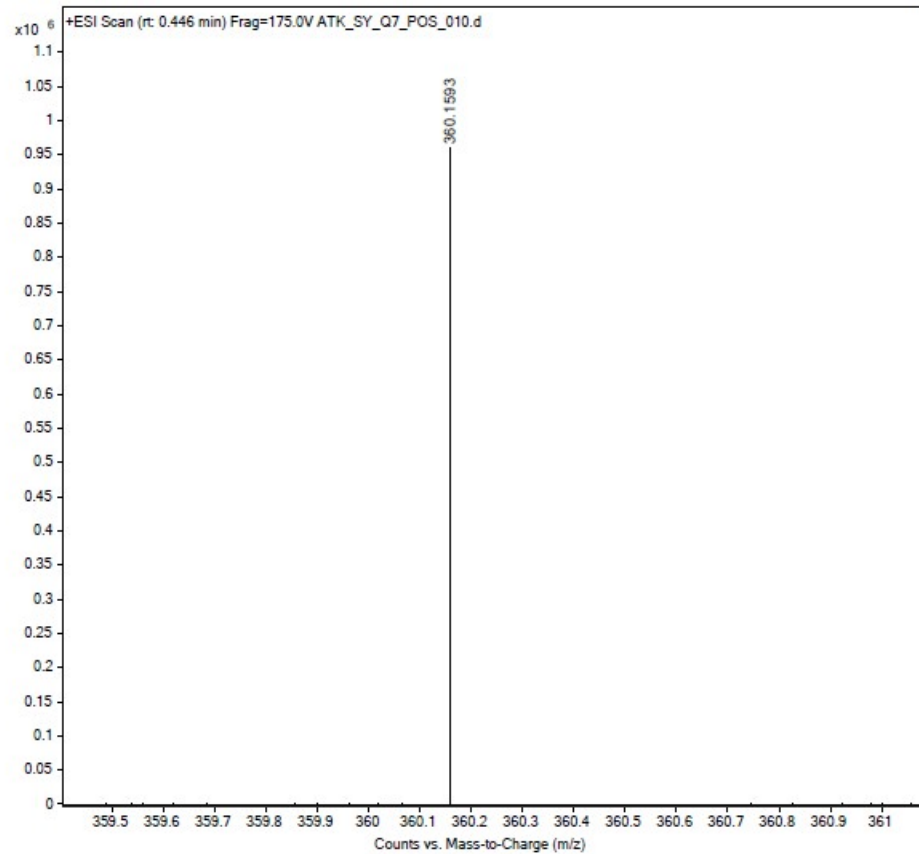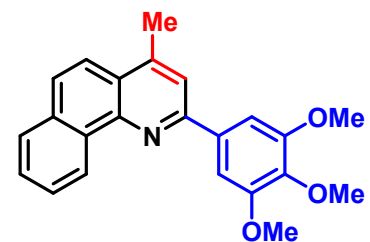

**<sup>1</sup>H NMR (400 MHz, CDCl<sub>3</sub>) spectrum of compound 3g**

ATK-SY-Q8-1H — ATK-SY-Q8-1H —

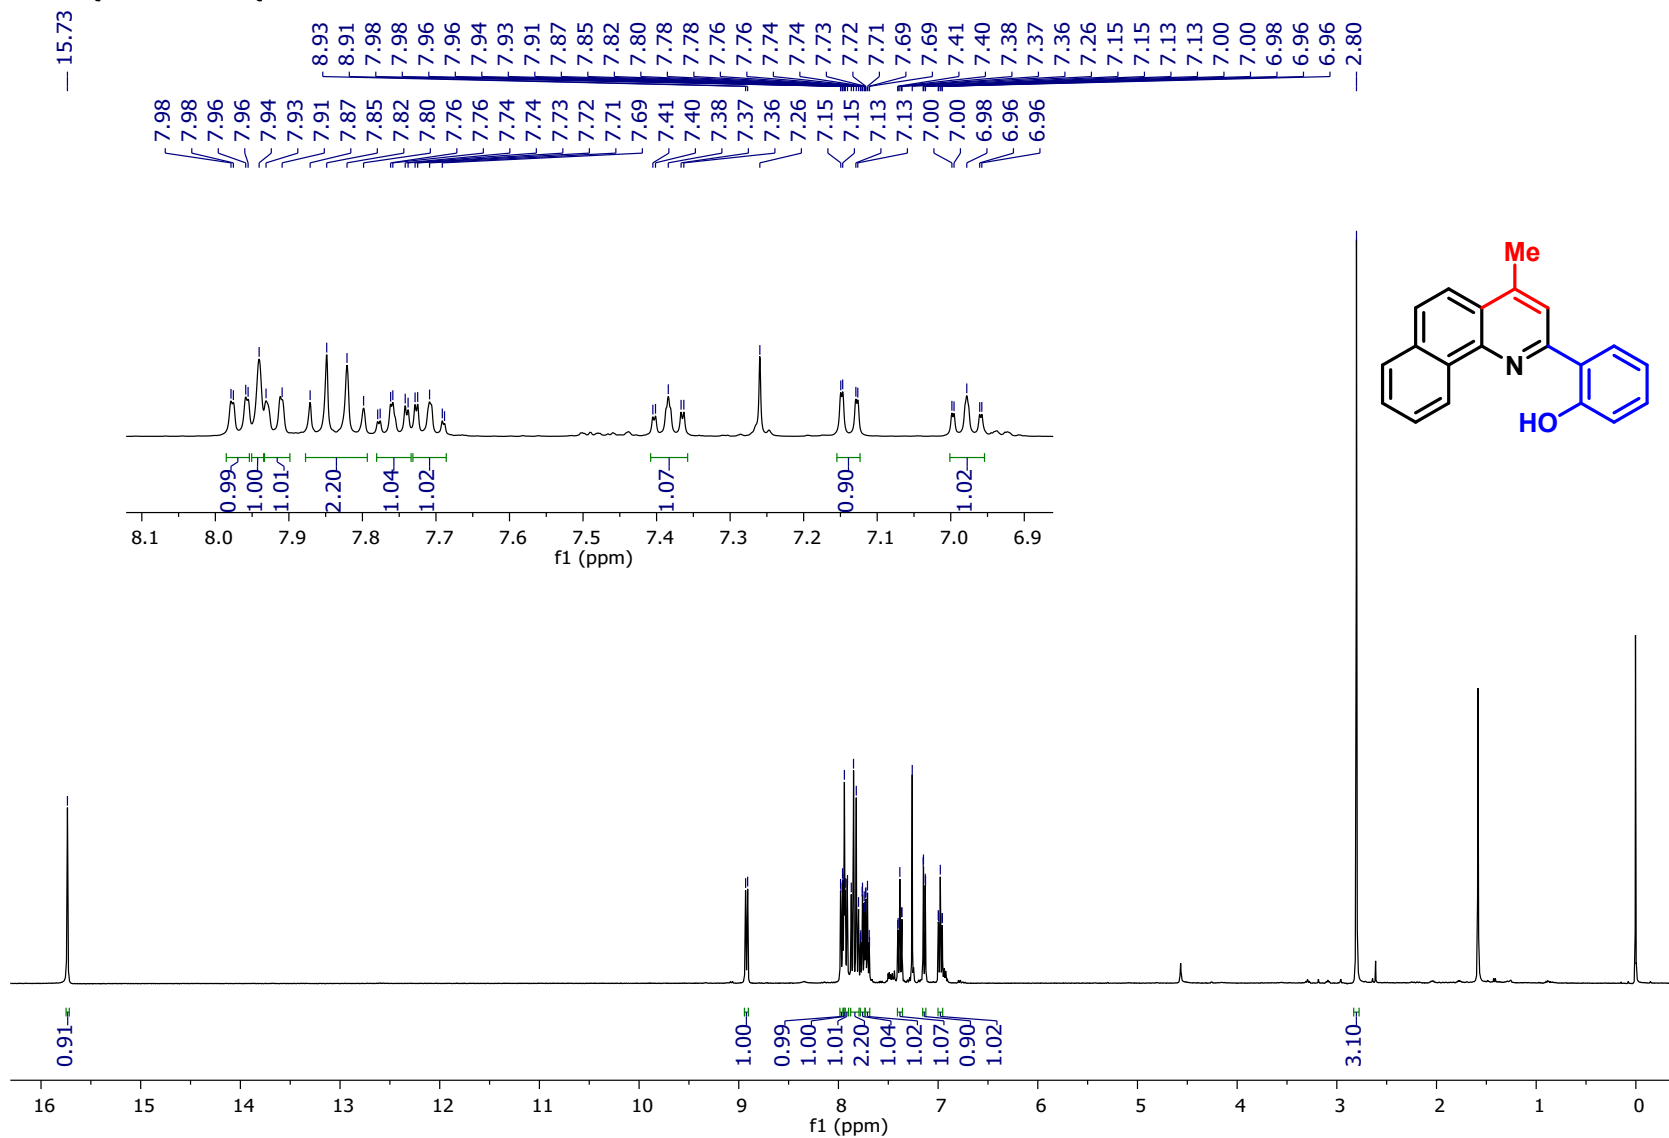



$^{13}\text{C}\{^1\text{H}\}$  NMR (150 MHz,  $\text{CDCl}_3$ ) spectrum of compound 3g

ATK-SY-P9-13C  
13C

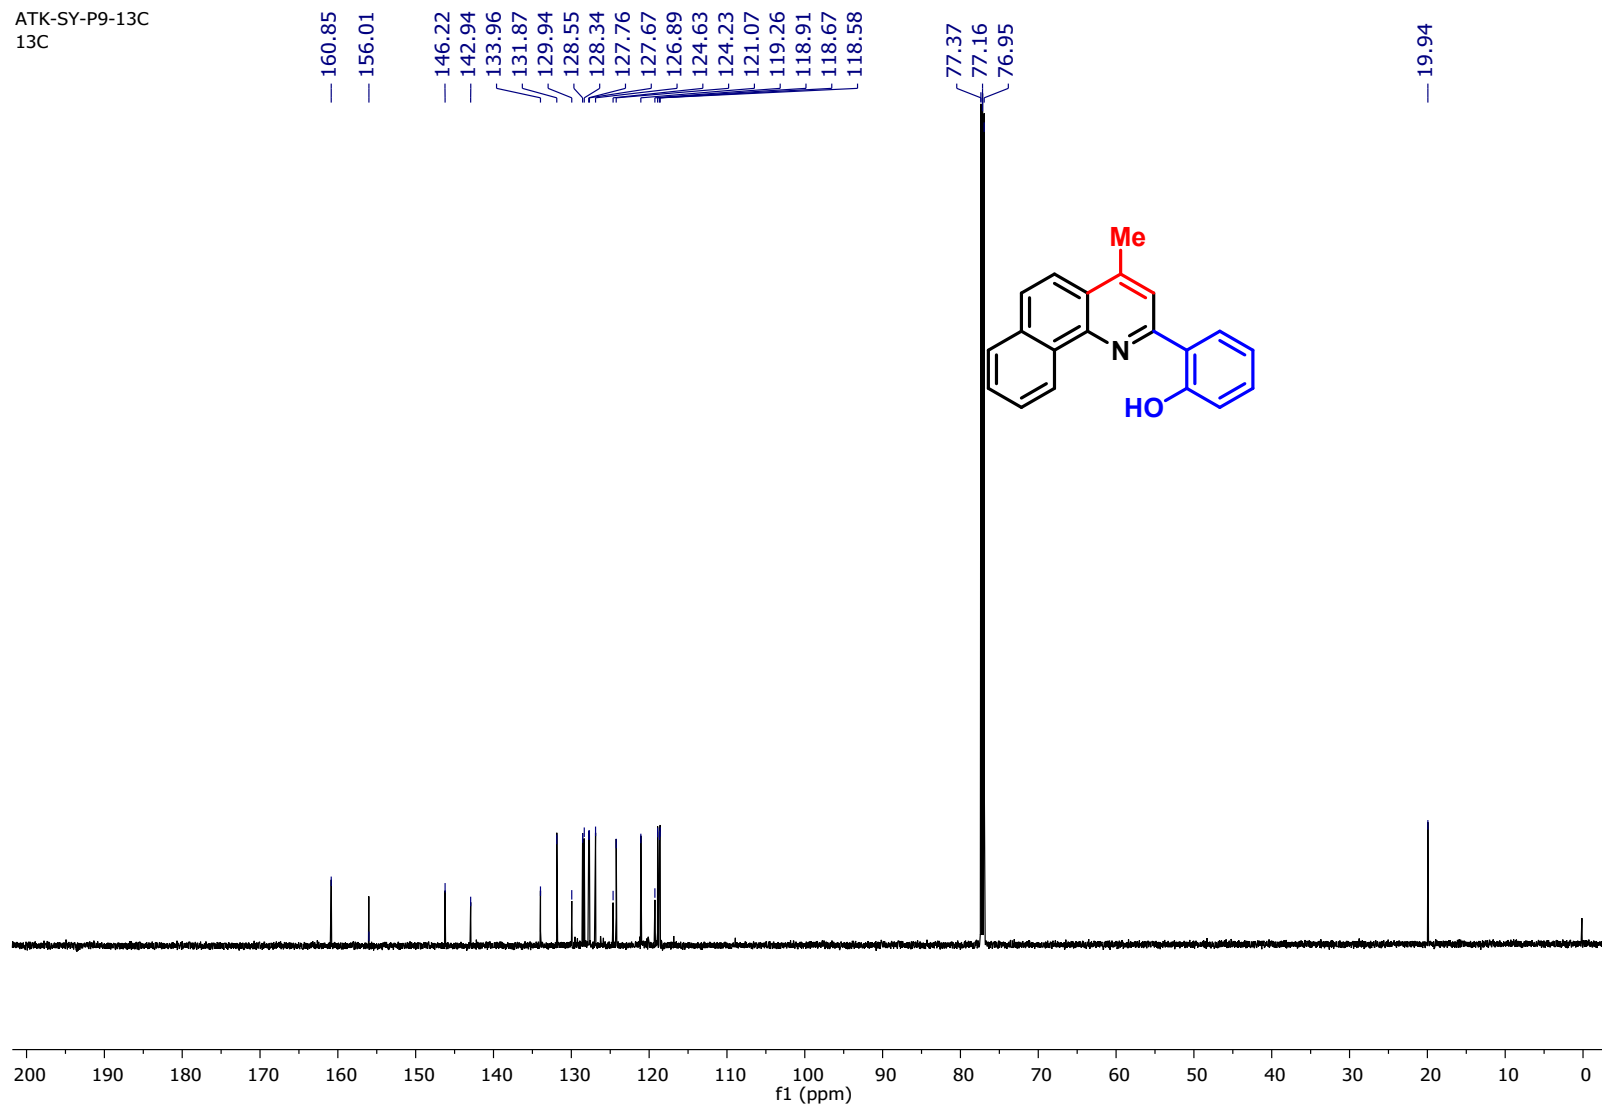

## HRMS spectrum of compound 3g

|             |                      |                        |         |                 |                                   |
|-------------|----------------------|------------------------|---------|-----------------|-----------------------------------|
| Sample Name | SY_98                | Position               | P1-B1   | Instrument Name | Instrument 1                      |
| User Name   |                      | Inj Vol                | 10      | InjPosition     |                                   |
| Sample Type | Sample               | IRM Calibration Status | Success | Data Filename   | SY_98_010.d                       |
| ACQ Method  | FULL SCAN-POSITIVE.m | Comment                |         | Acquired Time   | 28-Aug-22 12:24:36 AM (UTC+05:30) |

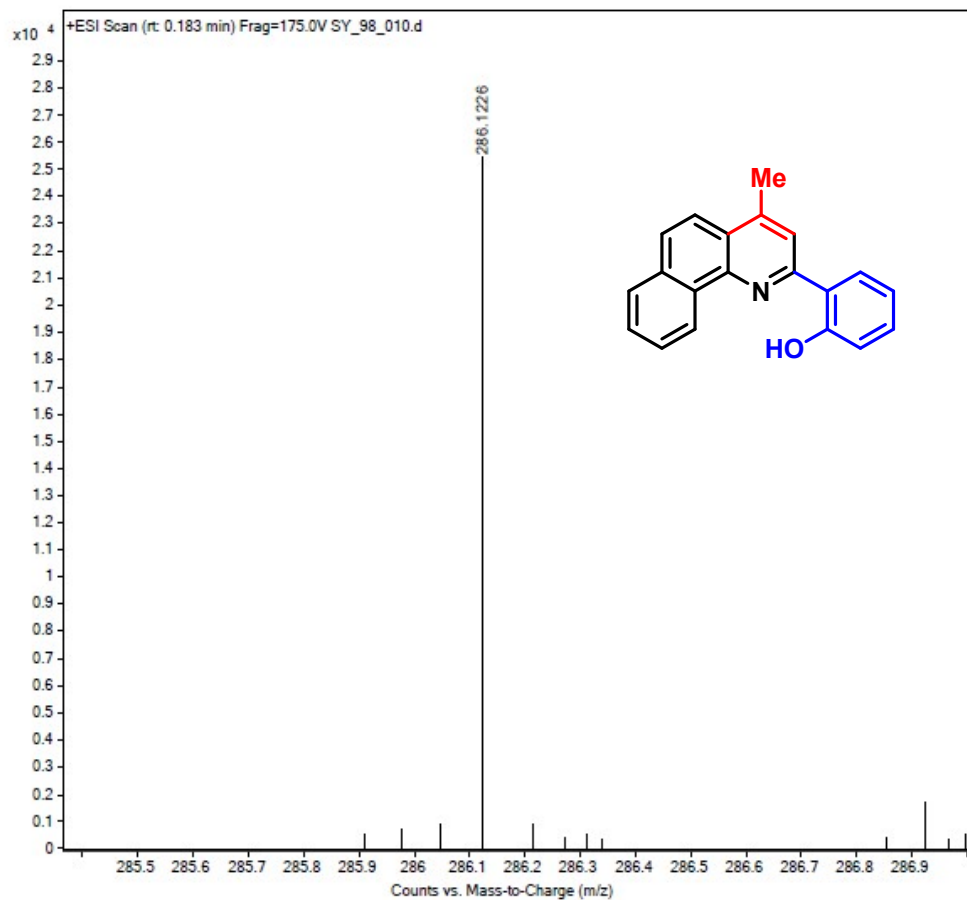

**<sup>1</sup>H NMR (600 MHz, CDCl<sub>3</sub>) spectrum of compound 3h**

ATK-SY-Q10-1H — 1H —

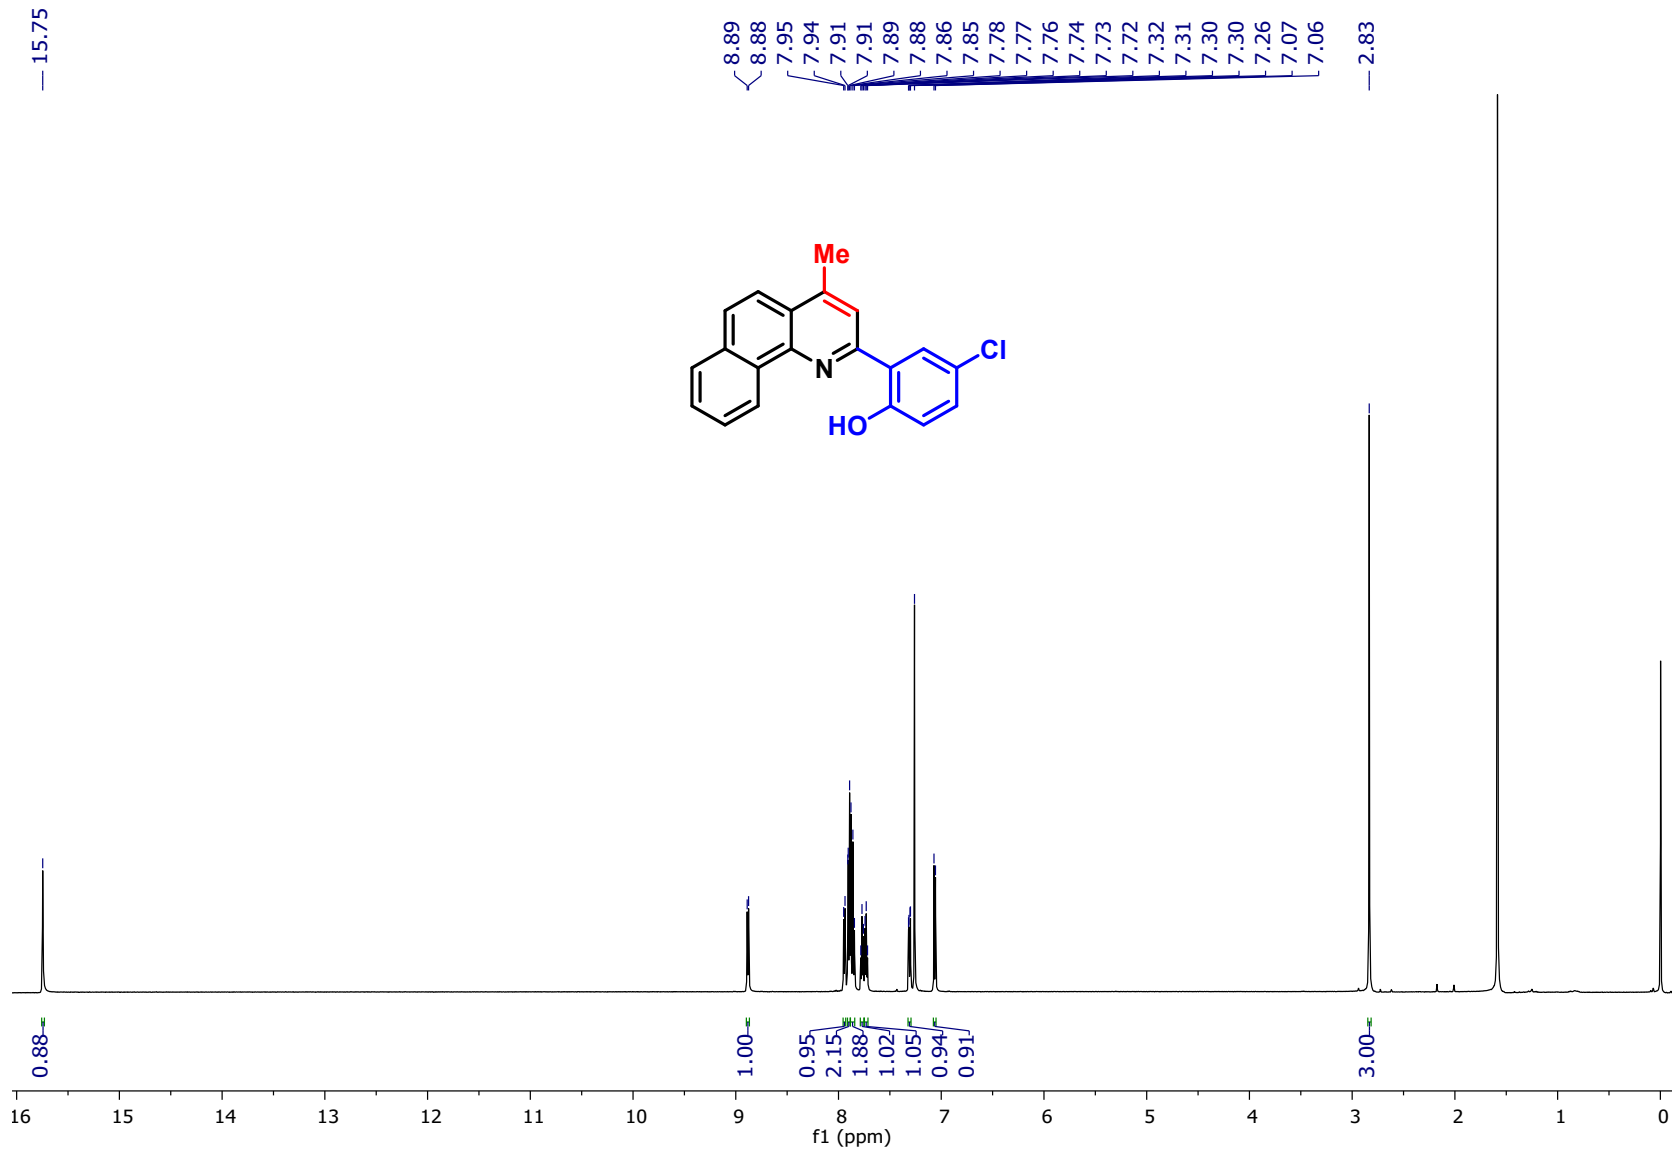

$^{13}\text{C}\{^1\text{H}\}$  (150 MHz,  $\text{CDCl}_3$ ) NMR spectrum of compound 3h

ATK-SY-Q10-13C — 13C —

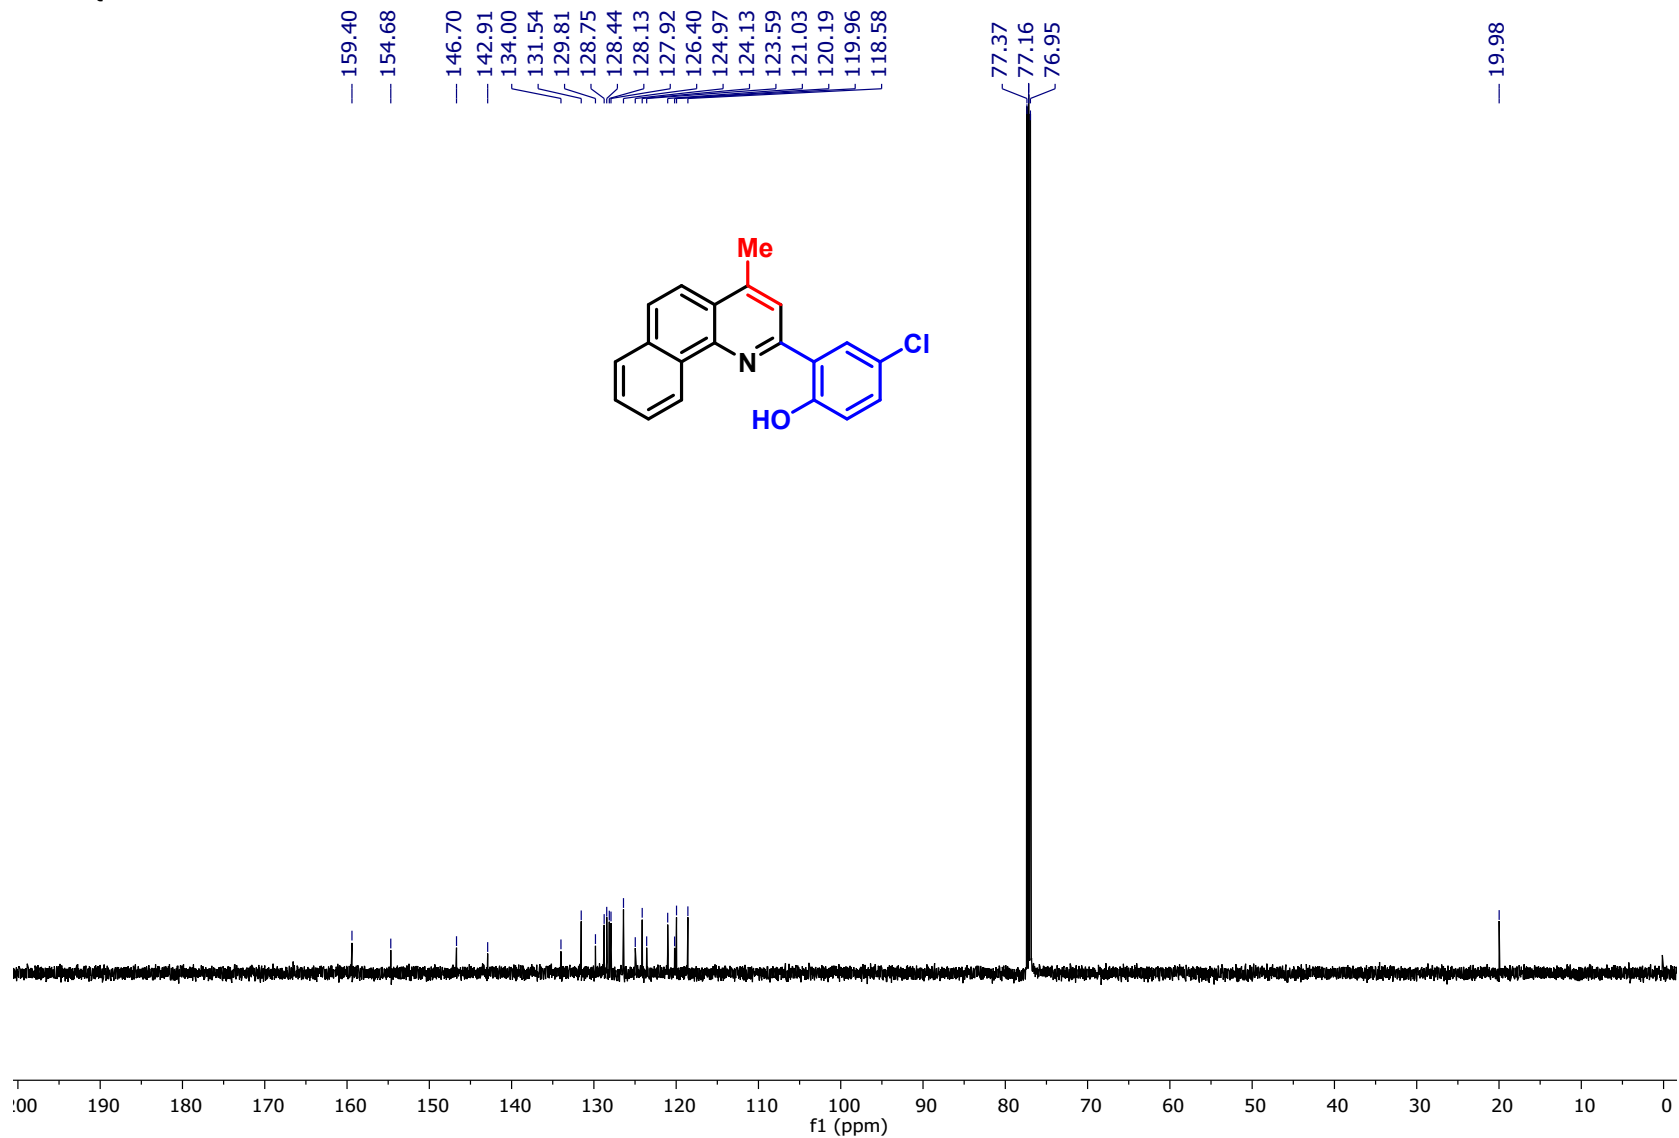

## HRMS spectrum of compound 3h

|             |                      |                        |         |                 |                                   |
|-------------|----------------------|------------------------|---------|-----------------|-----------------------------------|
| Sample Name | ATK_SY_Q10_POS       | Position               | P1-C9   | Instrument Name | Instrument 1                      |
| User Name   |                      | Inj Vol                | 10      | InjPosition     |                                   |
| Sample Type | Sample               | IRM Calibration Status | Success | Data Filename   | ATK_SY_Q10_POS_004.d              |
| ACQ Method  | FULL SCAN-POSITIVE.m | Comment                |         | Acquired Time   | 28-Feb-23 05:06:49 PM (UTC+05:30) |

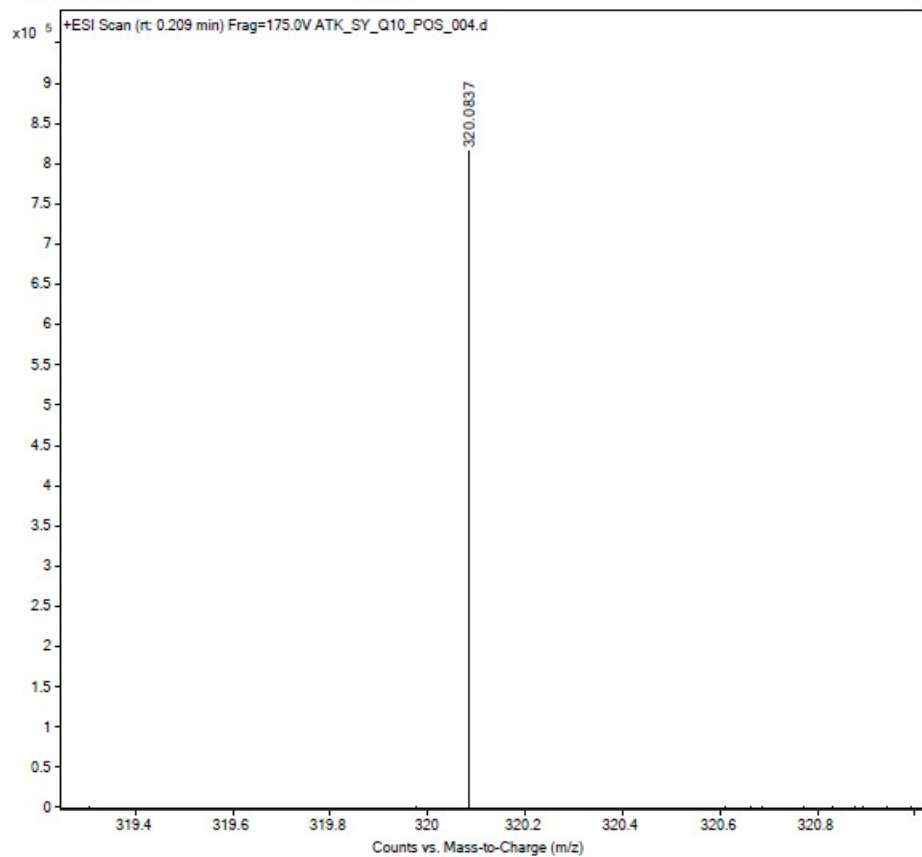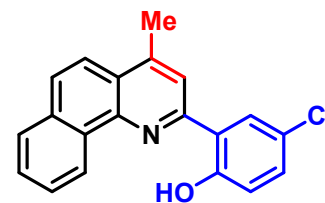

**<sup>1</sup>H NMR (600 MHz, CDCl<sub>3</sub>) spectrum of compound 3i**

ATK-SY-Q12-1H — 1H —

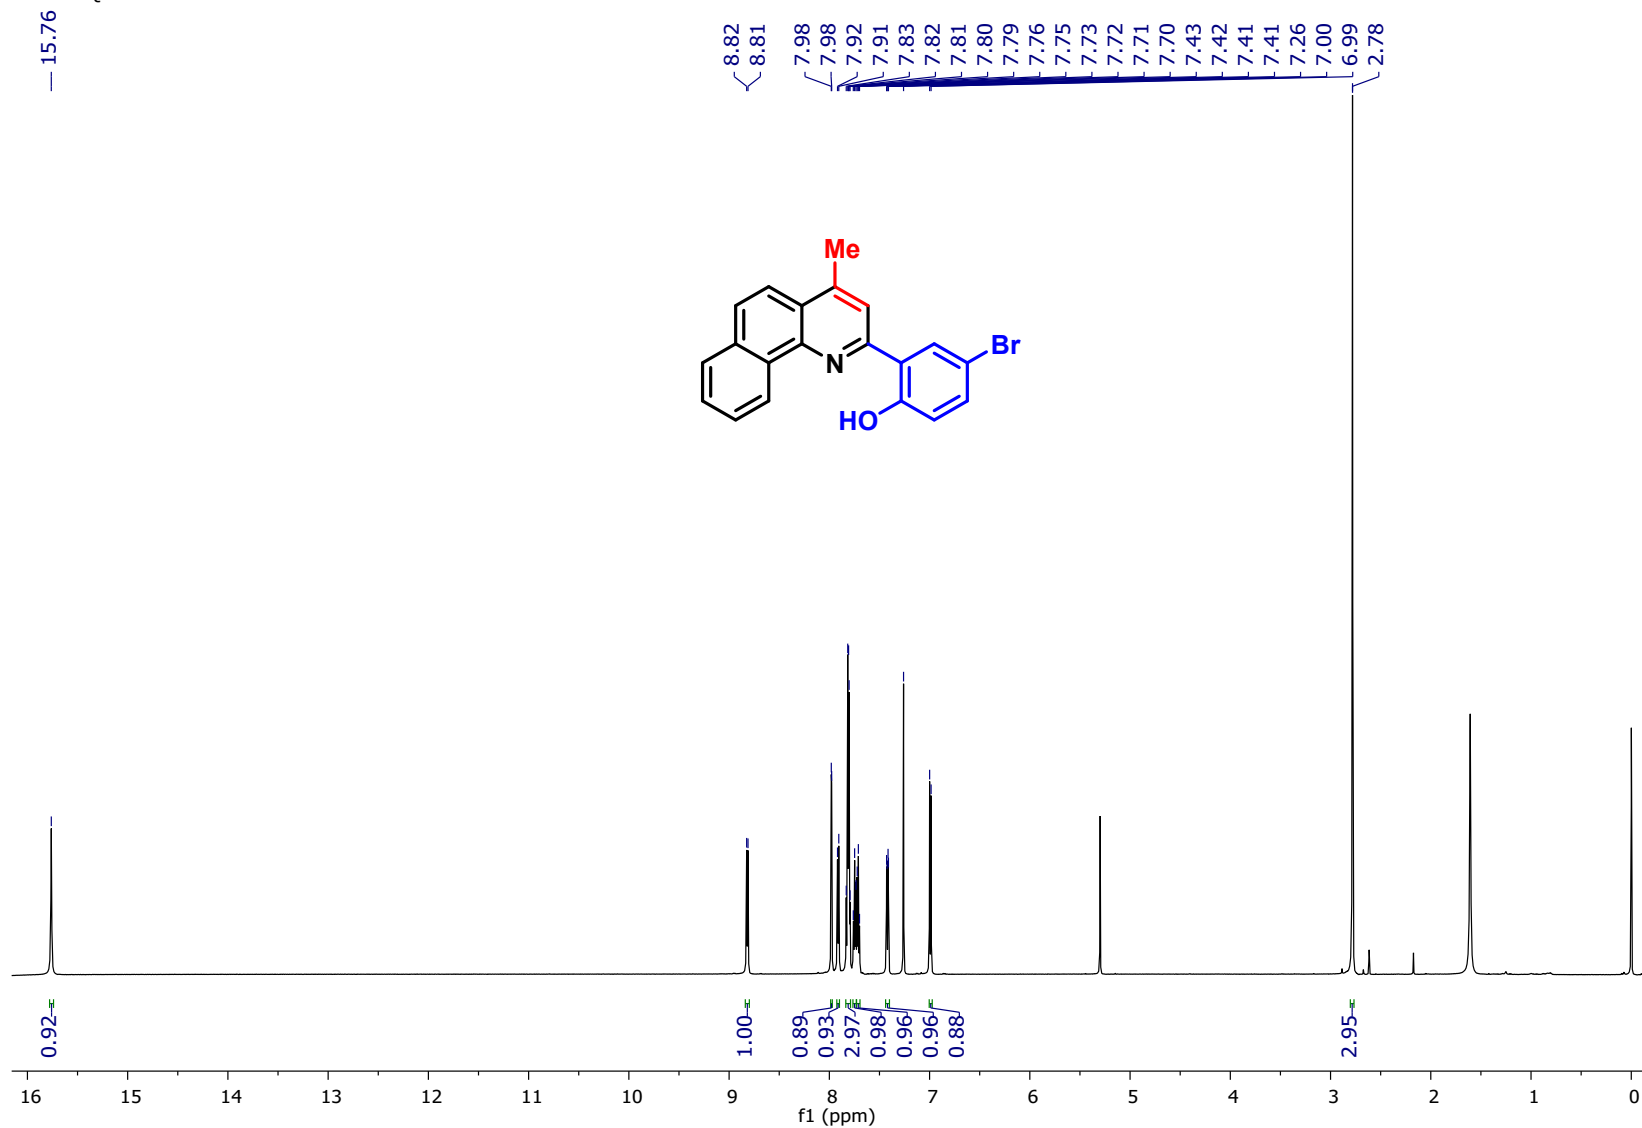

**$^{13}\text{C}\{^1\text{H}\}$  NMR (150 MHz,  $\text{CDCl}_3$ ) spectrum of compound 3i**

ATK-SY-Q12-13C  
13C

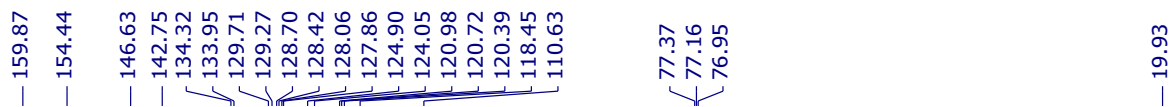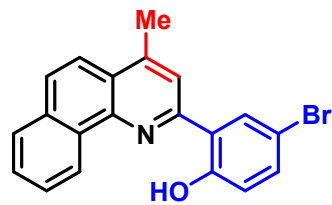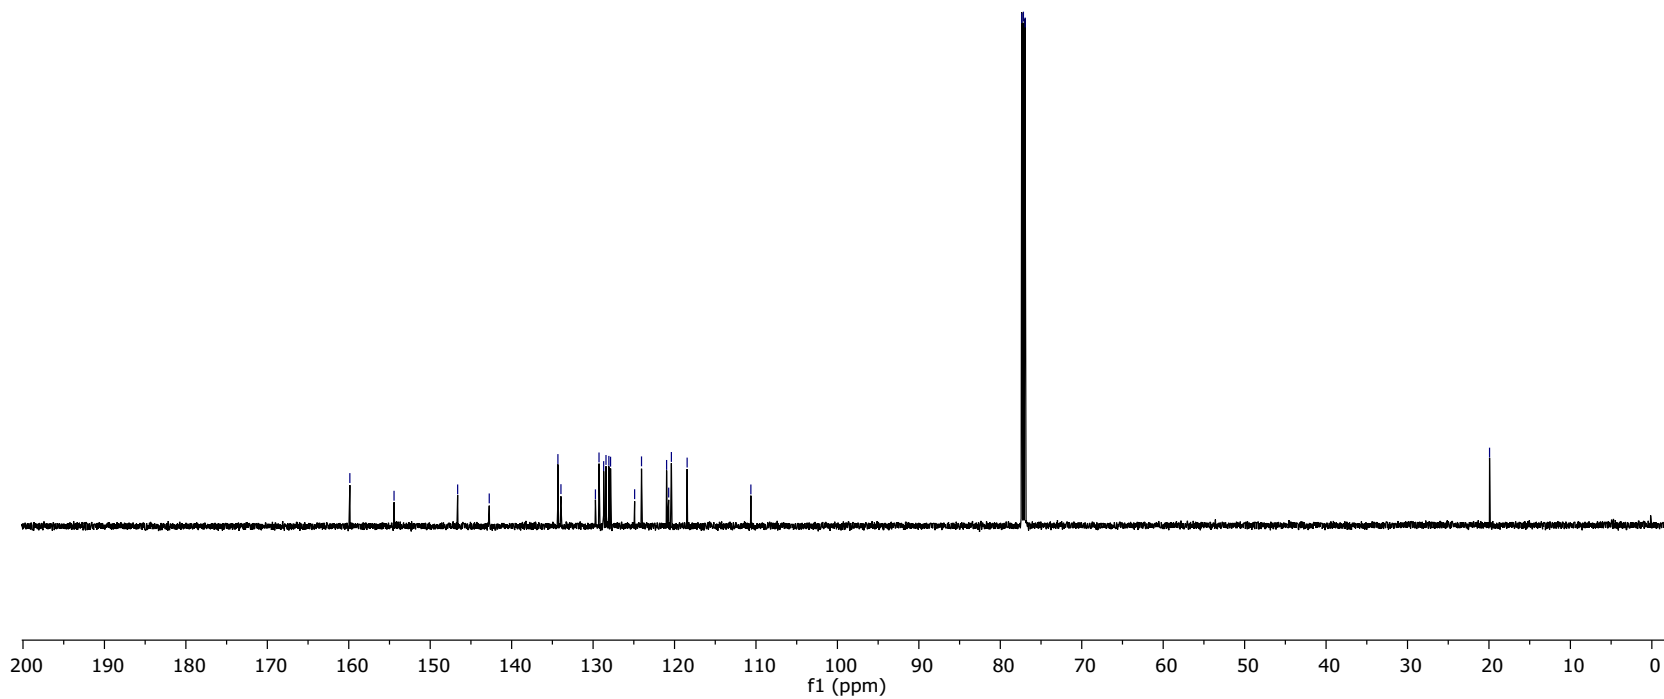

## HRMS spectrum of compound 3i

|             |                      |                        |         |                 |                                   |
|-------------|----------------------|------------------------|---------|-----------------|-----------------------------------|
| Sample Name | SY_1NA_5BR           | Position               | P1-A6   | Instrument Name | Instrument 1                      |
| User Name   |                      | Inj Vol                | 10      | InjPosition     |                                   |
| Sample Type | Sample               | IRM Calibration Status | Success | Data Filename   | SY_1NA_5BR_006.d                  |
| ACQ Method  | FULL SCAN-POSITIVE.m | Comment                |         | Acquired Time   | 28-Aug-22 12:17:11 AM (UTC+05:30) |

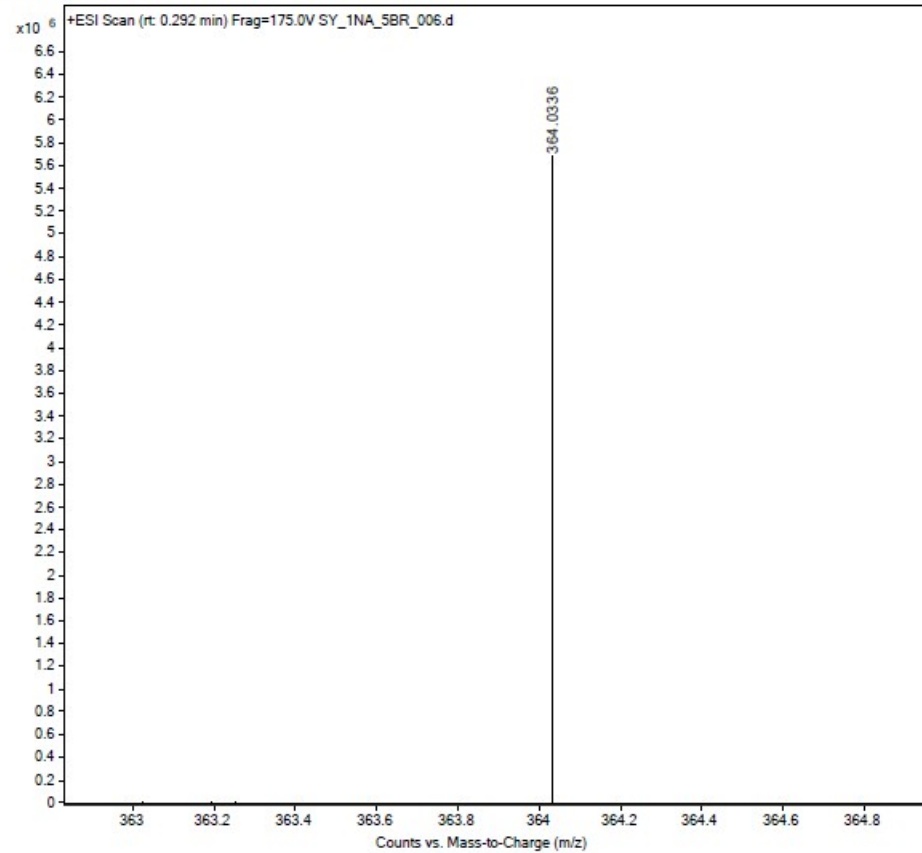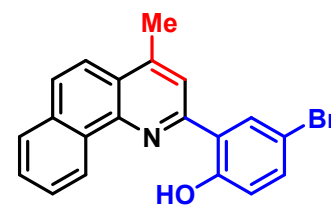



**<sup>1</sup>H NMR (400 MHz, CDCl<sub>3</sub>) spectrum of compound 3j**

ATK-SY-Q9-A-1H.3.fid — ATK-SY-Q9-A-1H

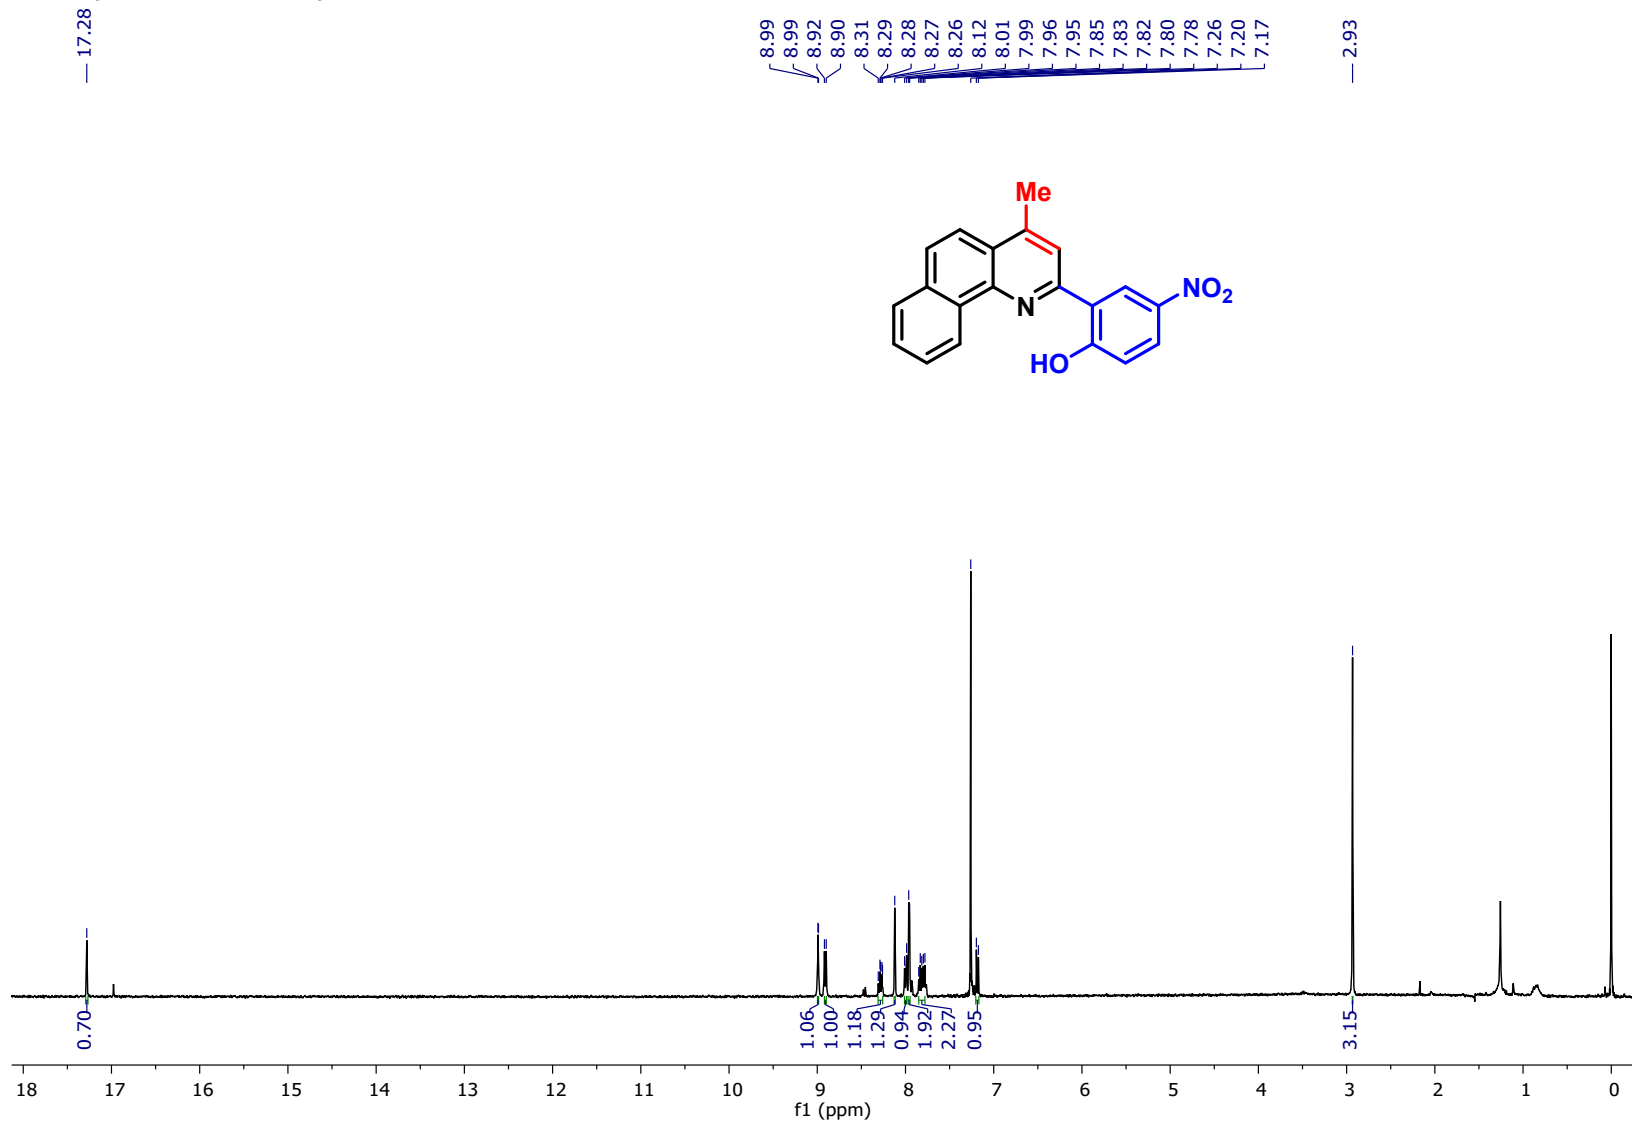

$^{13}\text{C}\{^1\text{H}\}$  NMR (125 MHz,  $\text{CDCl}_3$ ) spectrum of compound 3j

ATK-SY-Q9-13C.1.fid — ATK-SY-Q9-13C

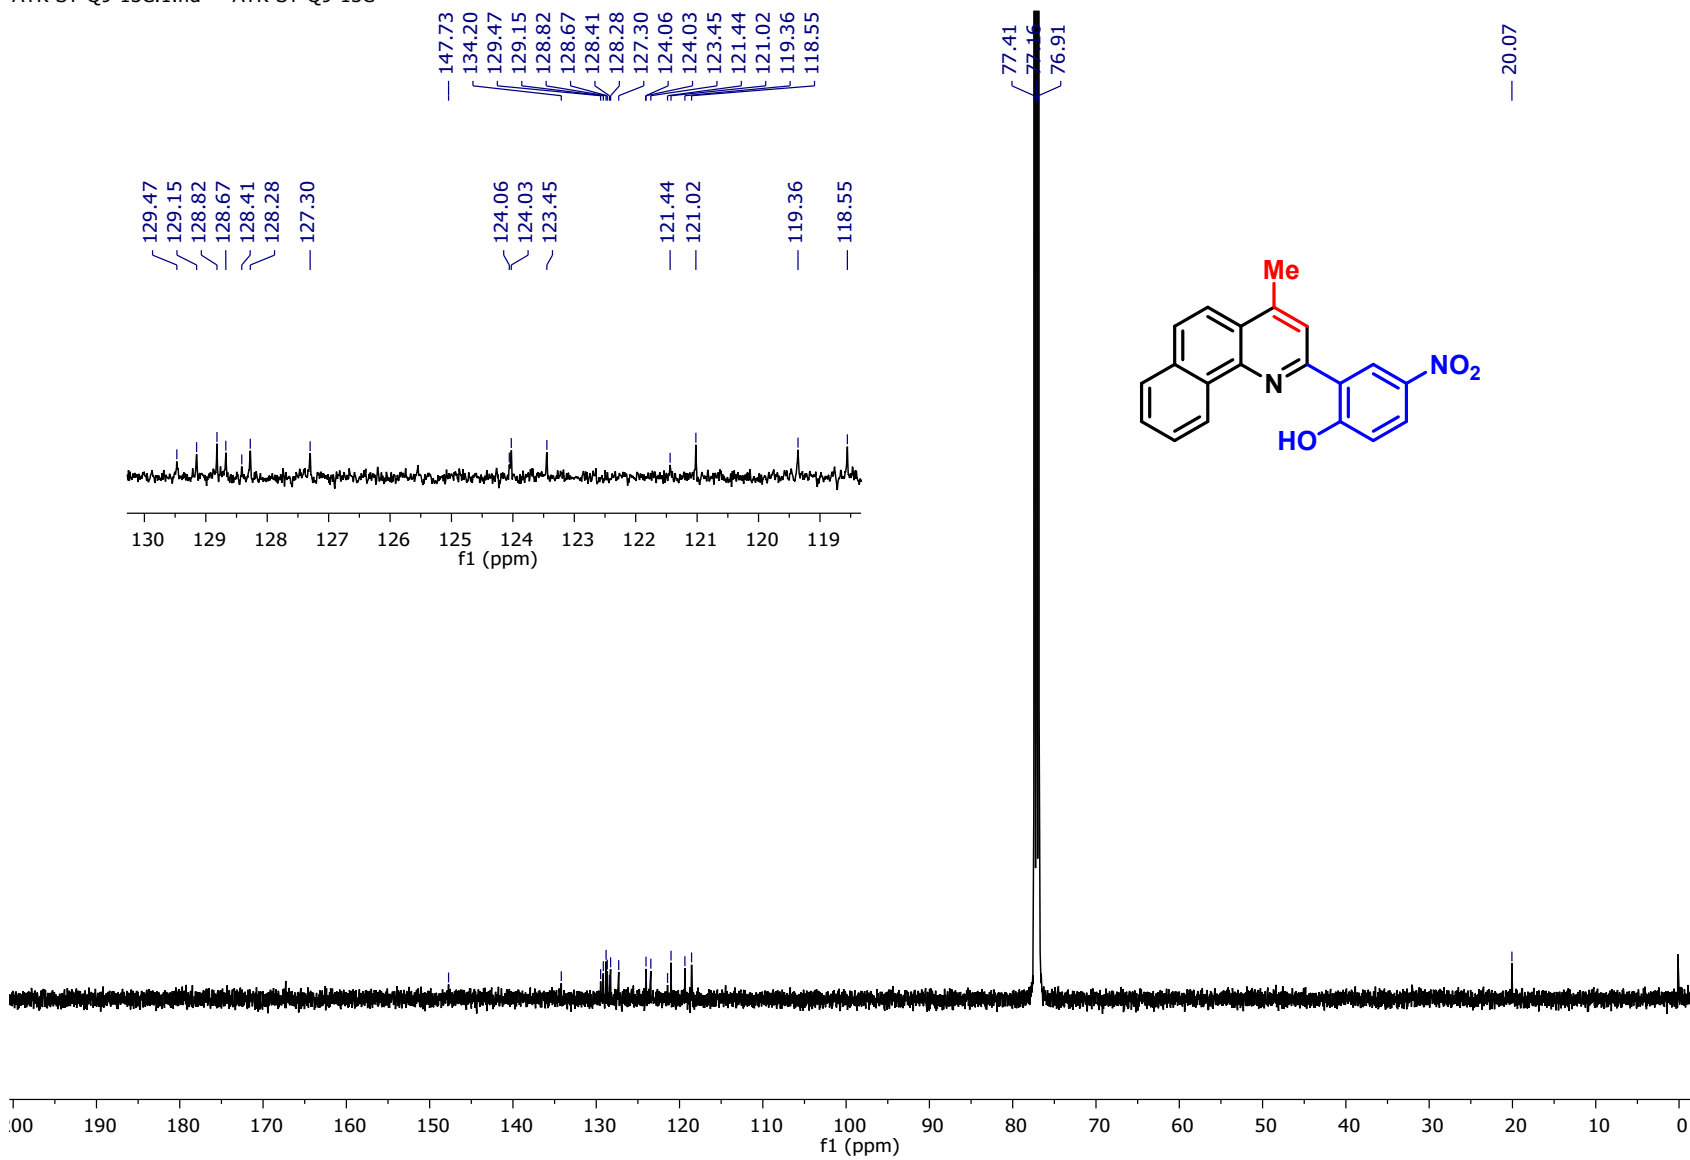

## HRMS spectrum of compound 3j

|             |                             |                        |         |                 |                                   |
|-------------|-----------------------------|------------------------|---------|-----------------|-----------------------------------|
| Sample Name | Sample44                    | Position               | P1-D10  | Instrument Name | QTOF                              |
| User Name   | SYSTEM (SYSTEM)             | Inj Vol                | 5       | InjPosition     |                                   |
| Sample Type | Sample                      | IRM Calibration Status | Success | Data Filename   | Q 9.d                             |
| ACQ Method  | DIRECT MASS_POSITIVE_01_1.m | Comment                |         | Acquired Time   | 22-May-23 11:37:31 AM (UTC+05:30) |

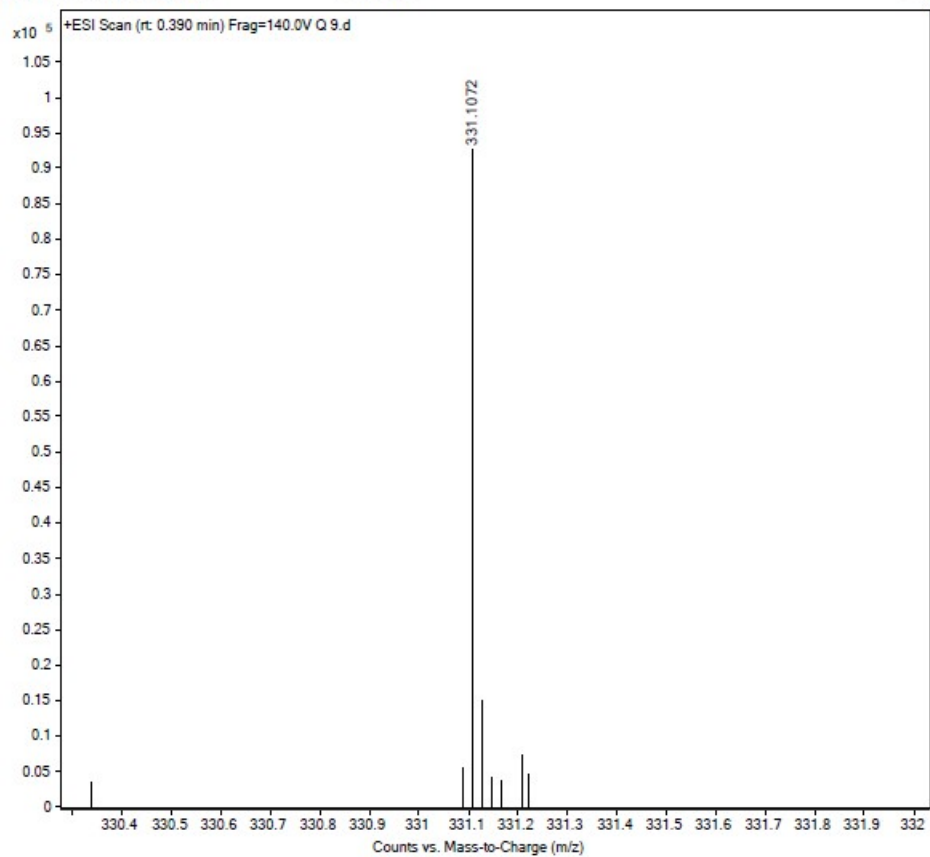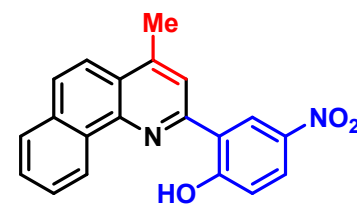

# <sup>1</sup>H NMR (400 MHz, CDCl<sub>3</sub>) spectrum of compound 3k

ATK-SY-Q22-1H.1.fid — ATK-SY-Q22-1H

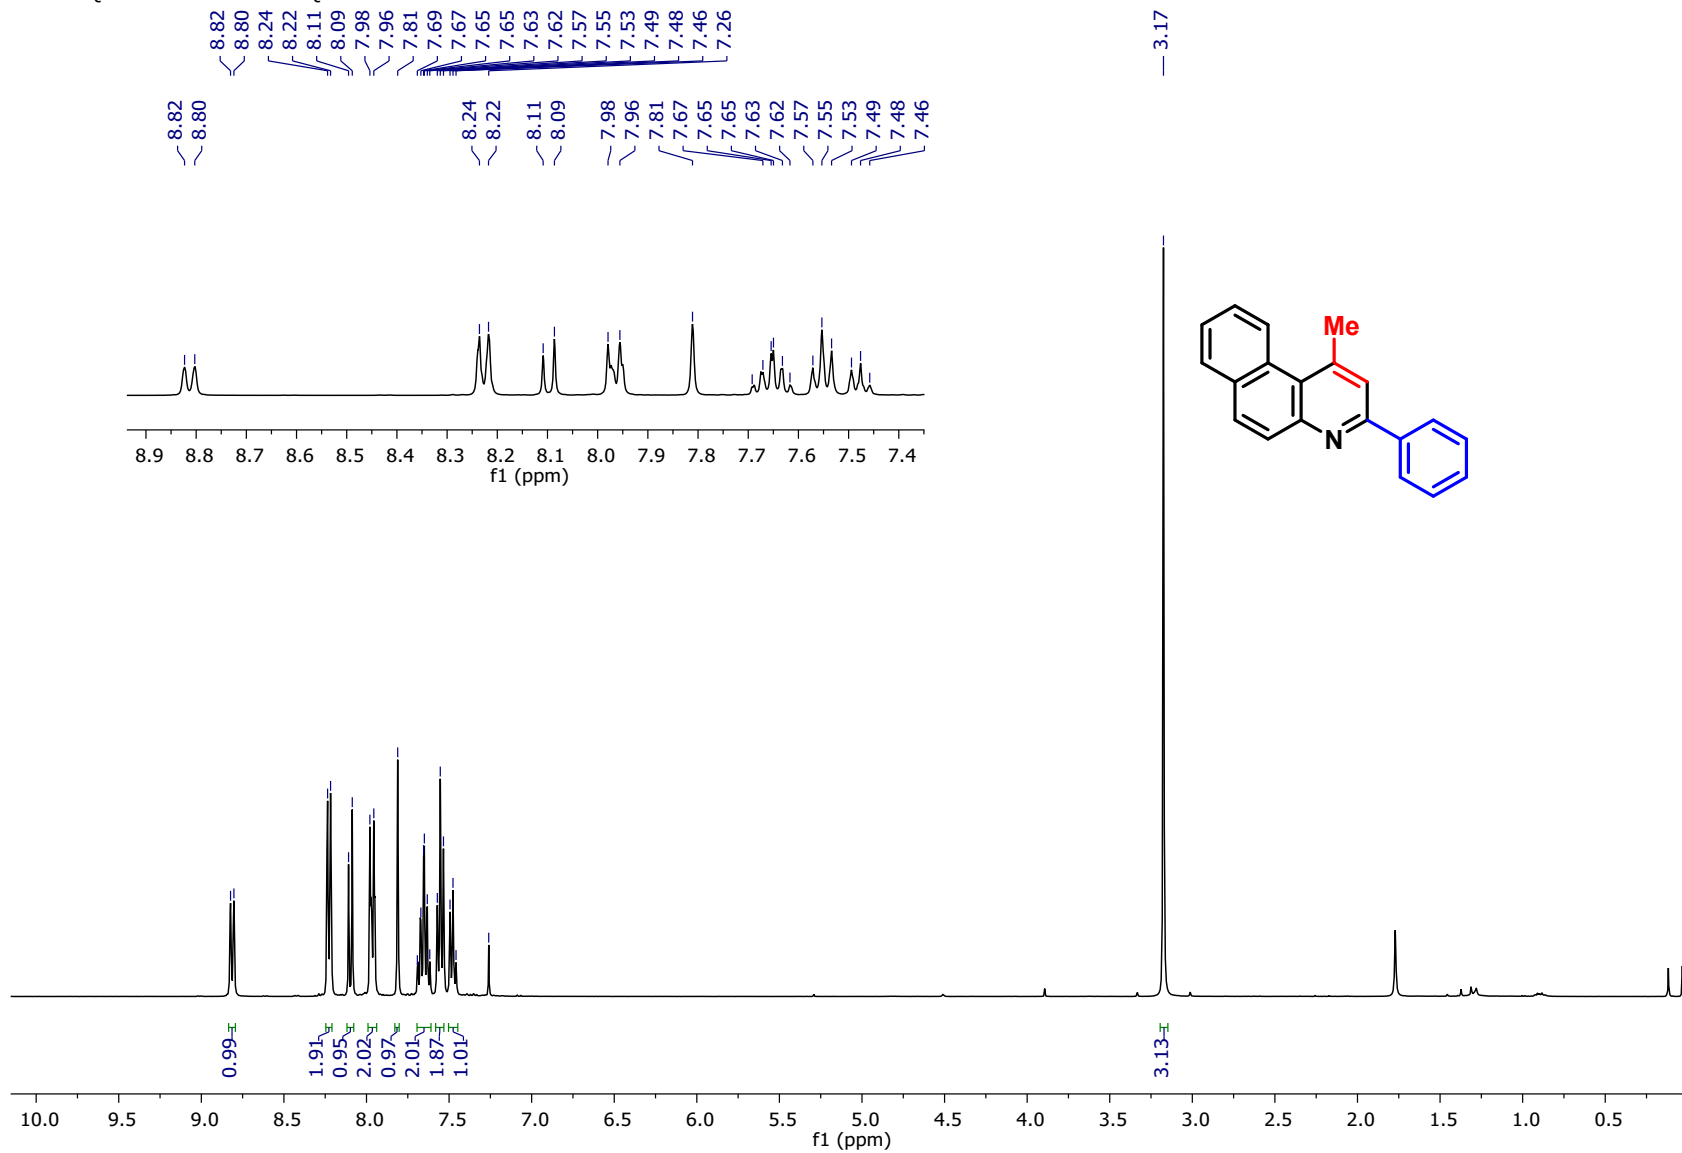

**$^{13}\text{C}\{^1\text{H}\}$  NMR (100 MHz,  $\text{CDCl}_3$ ) spectrum of compound 3k**

ATK-SY-Q22-13C.2.fid — ATK-SY-Q22-13C

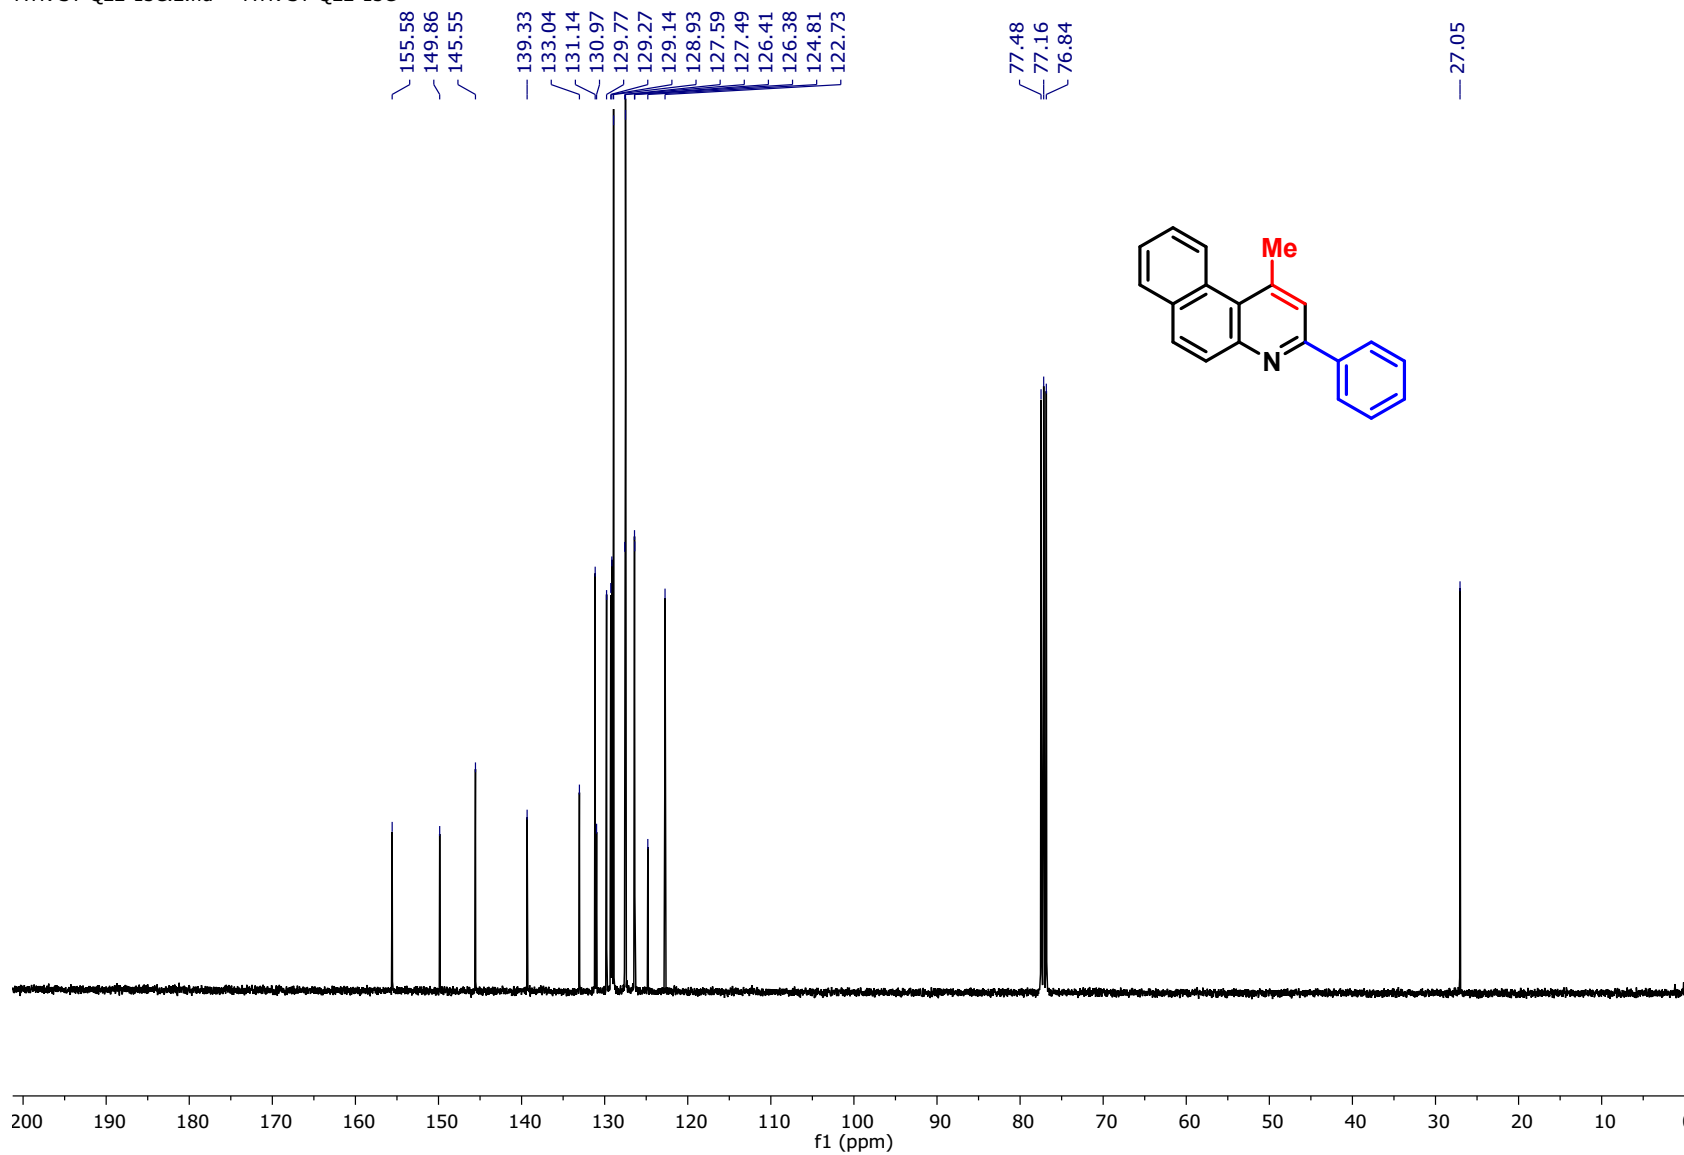

## HRMS spectrum of compound 3k

|             |                      |                        |         |                 |                                   |
|-------------|----------------------|------------------------|---------|-----------------|-----------------------------------|
| Sample Name | ATK_SY_Q22 RM_POS    | Position               | P1-C8   | Instrument Name | Instrument 1                      |
| User Name   |                      | Inj Vol                | 10      | InjPosition     |                                   |
| Sample Type | Sample               | IRM Calibration Status | Success | Data Filename   | ATK_SY_Q22 RM_POS_003.d           |
| ACQ Method  | FULL SCAN-POSITIVE.m | Comment                |         | Acquired Time   | 28-Feb-23 05:05:15 PM (UTC+05:30) |

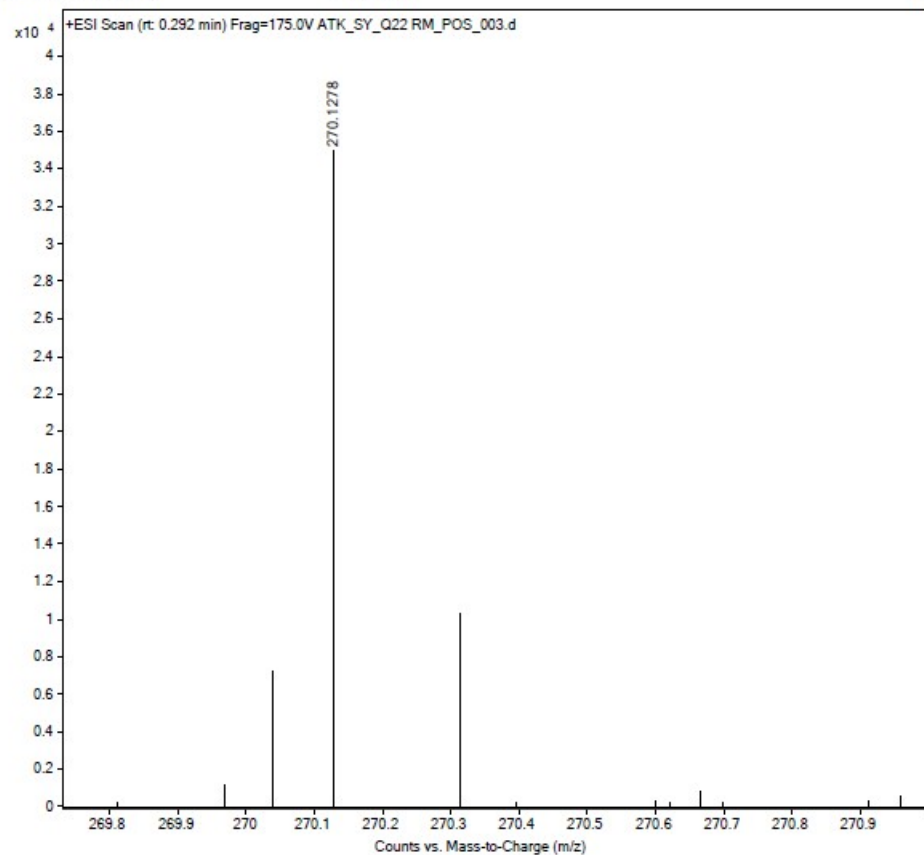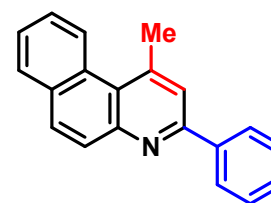

# <sup>1</sup>H NMR (500 MHz, CDCl<sub>3</sub>) spectrum of compound 3l

ATK-SY-Q28-1H.1.fid — ATK-SY-Q28-1H

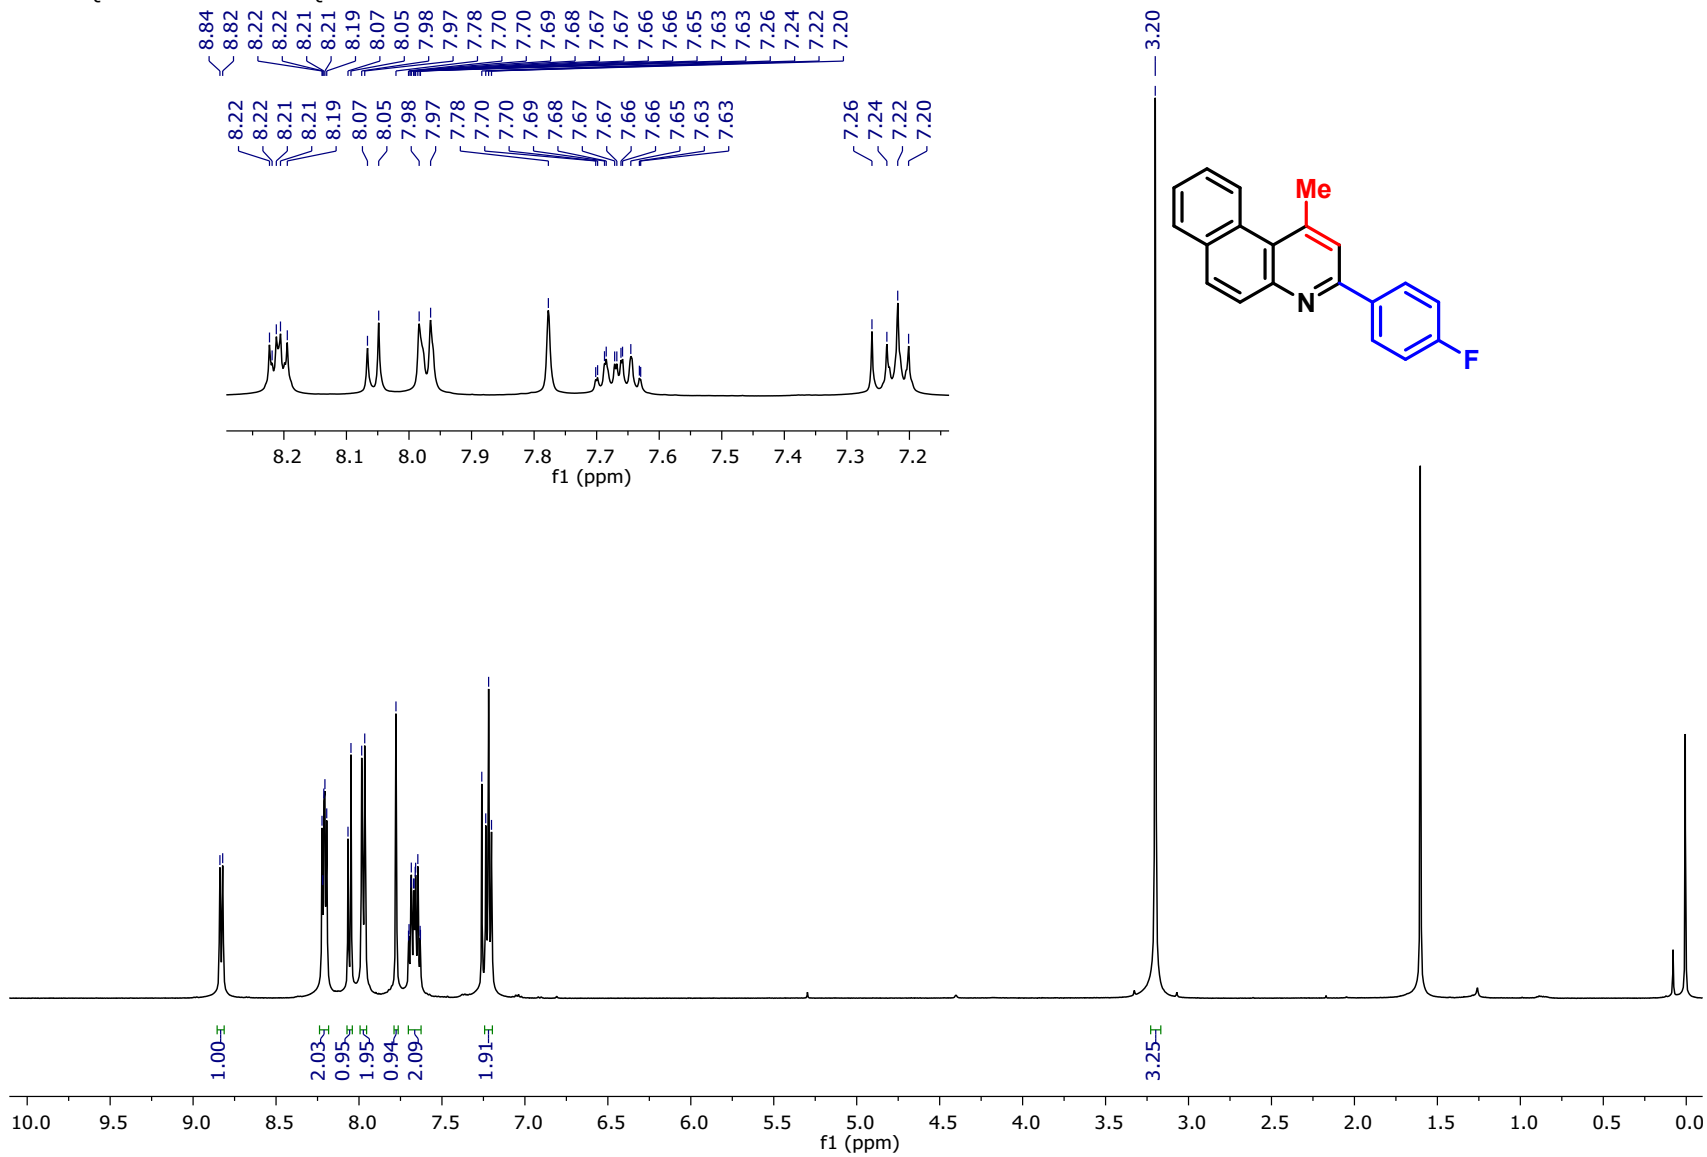

$^{13}\text{C}\{^1\text{H}\}$  NMR (125 MHz,  $\text{CDCl}_3$ ) spectrum of compound 3l

ATK-SY-Q28-13C.3.fid — ATK-SY-Q28-13C

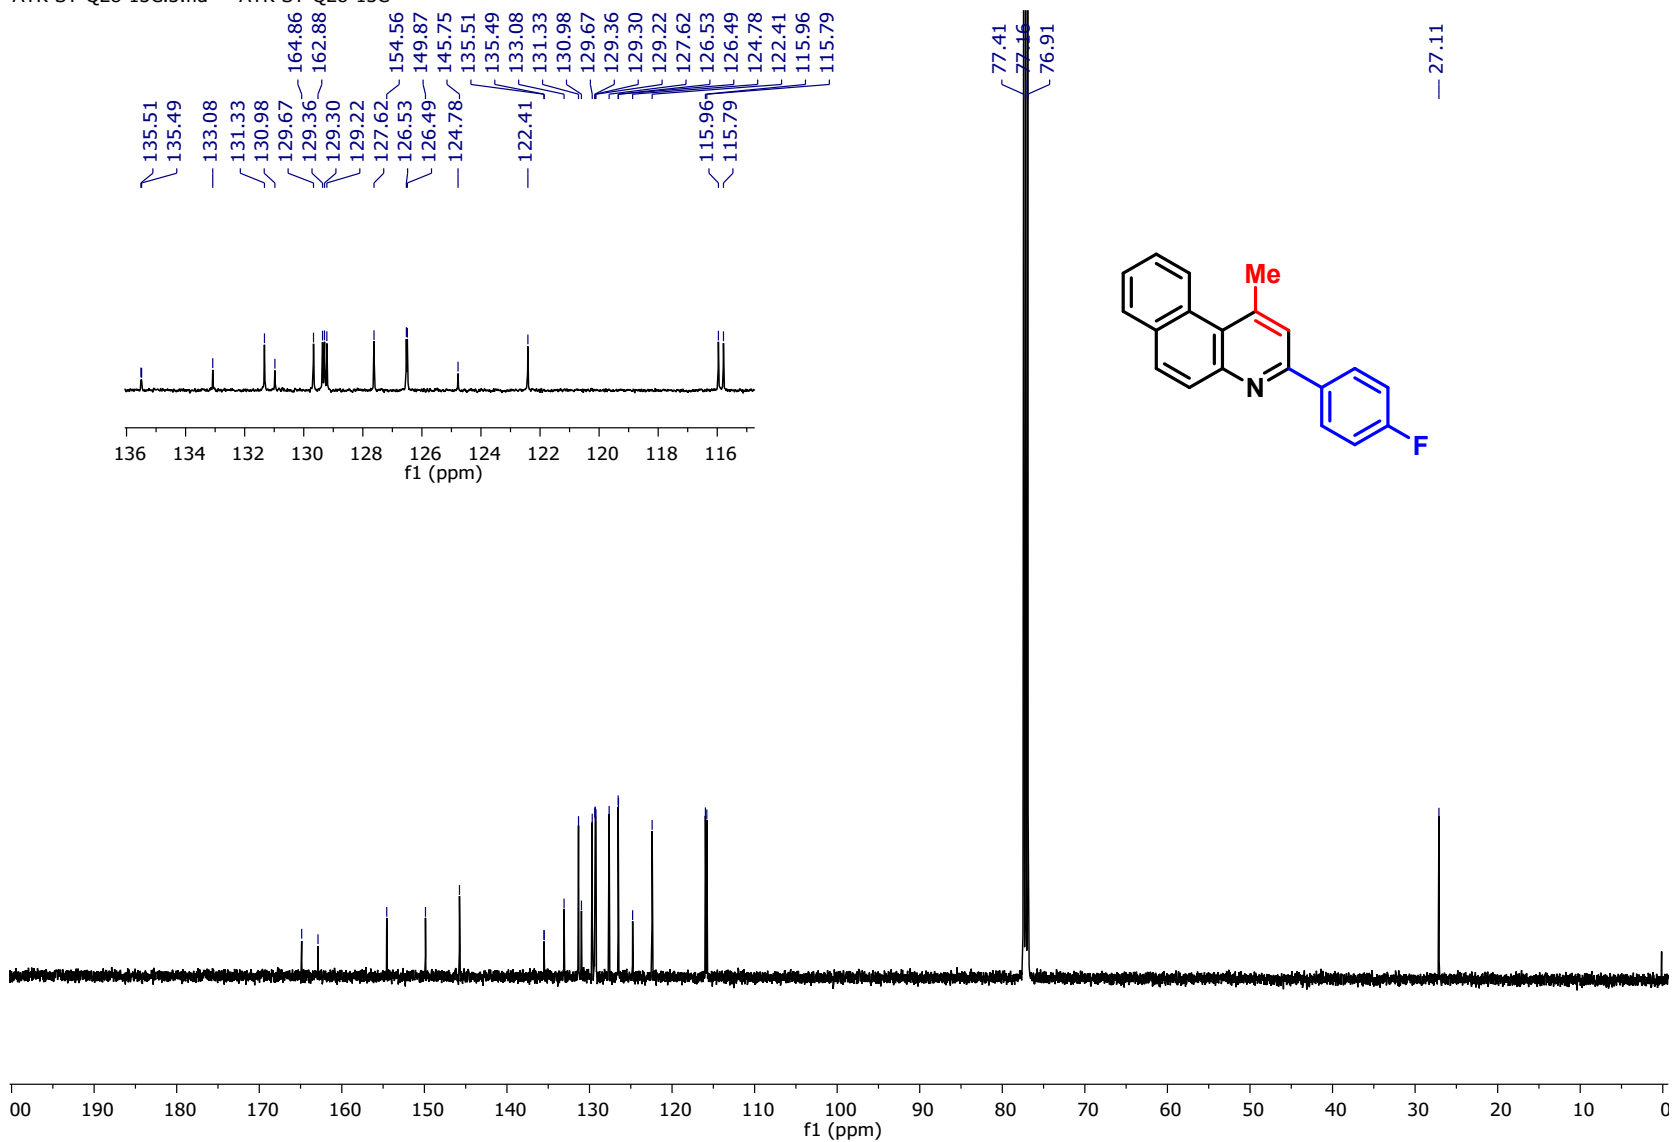



**<sup>19</sup>F NMR (471 MHz, CDCl<sub>3</sub>) spectrum of compound 31**

SY-Q28-19F.1.fid — SY-Q28-19F

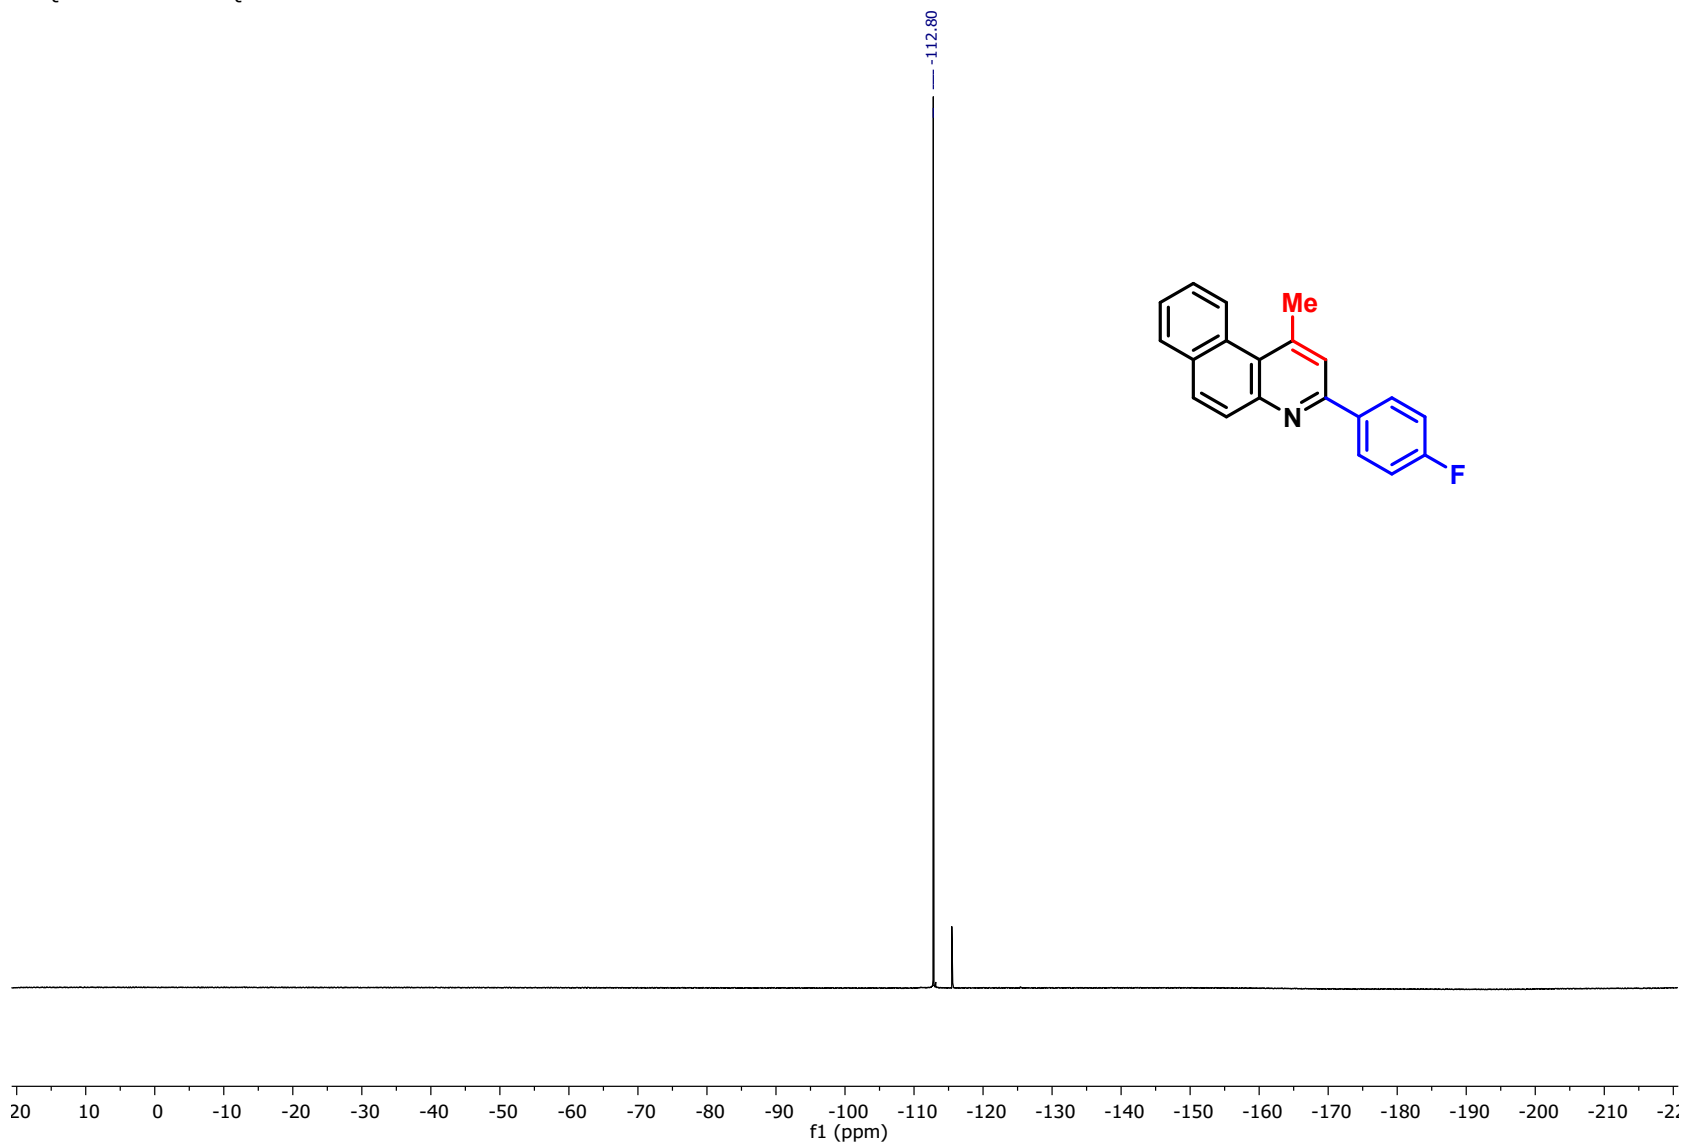

## HRMS spectrum of compound 3l

|             |                      |                        |         |                 |                                   |
|-------------|----------------------|------------------------|---------|-----------------|-----------------------------------|
| Sample Name | ATK_SY_Q28_POS       | Position               | P1-E2   | Instrument Name | Instrument 1                      |
| User Name   |                      | Inj Vol                | 10      | InjPosition     |                                   |
| Sample Type | Sample               | IRM Calibration Status | Success | Data Filename   | ATK_SY_Q28_POS_016.d              |
| ACQ Method  | FULL_SCAN-POSITIVE.m | Comment                |         | Acquired Time   | 28-Feb-23 05:27:12 PM (UTC+05:30) |

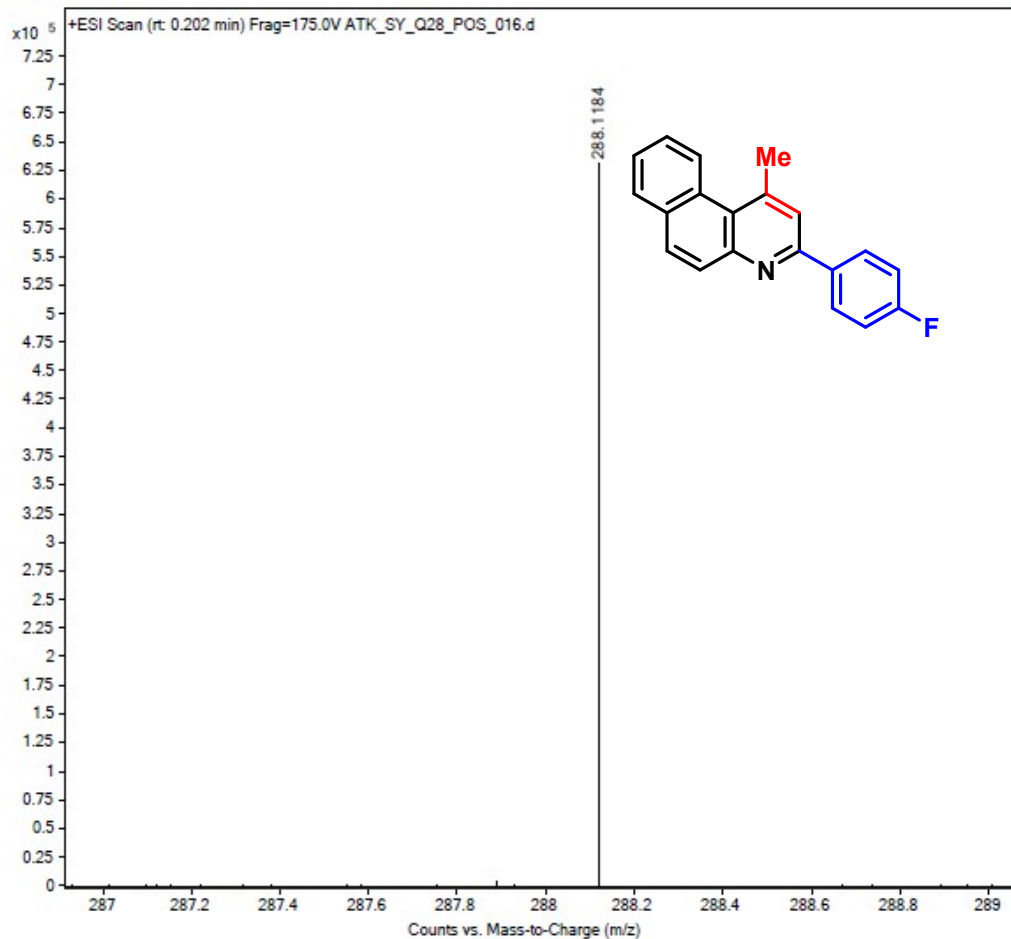

**<sup>1</sup>H NMR (400 MHz, CDCl<sub>3</sub>) spectrum of compound 3m**

ATK-SY-Q26-1H.1.fid — ATK-SY-Q26-1H

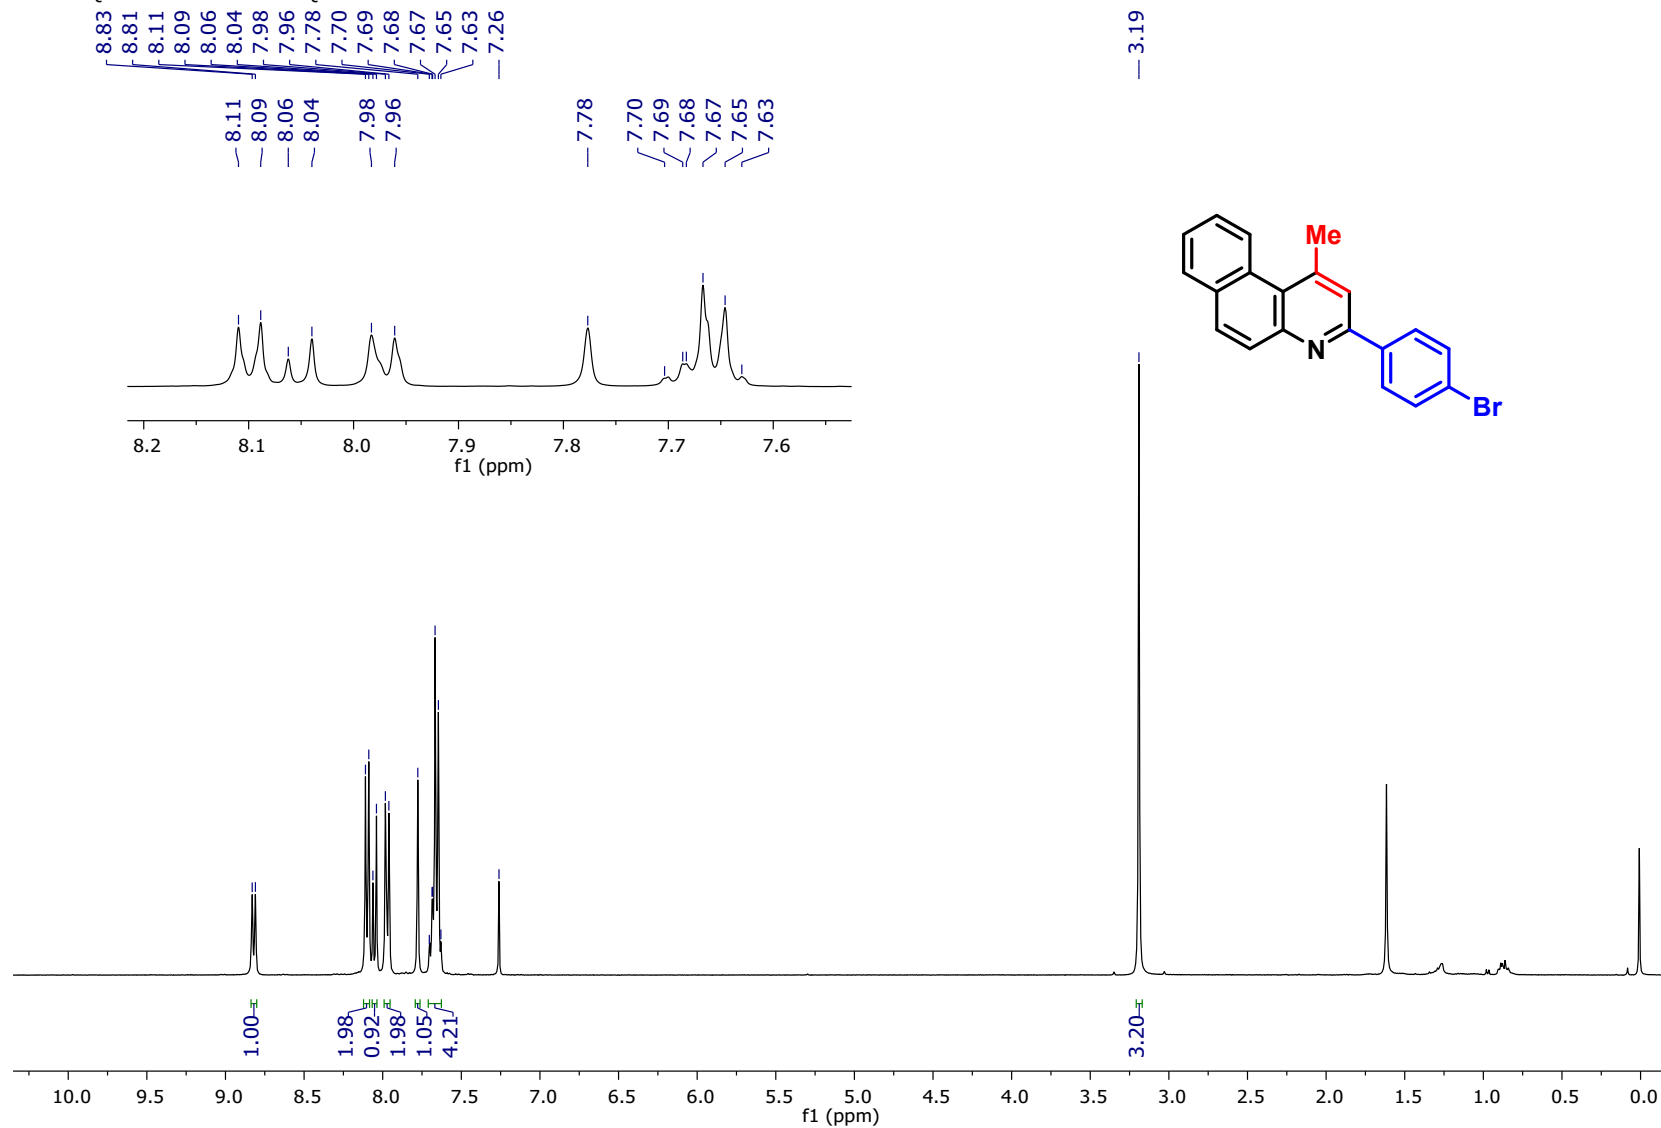

$^{13}\text{C}\{^1\text{H}\}$  NMR (125 MHz,  $\text{CDCl}_3$ ) spectrum of compound 3m

ATK-SY-Q26-13C.1.fid — ATK-SY-Q26-13C

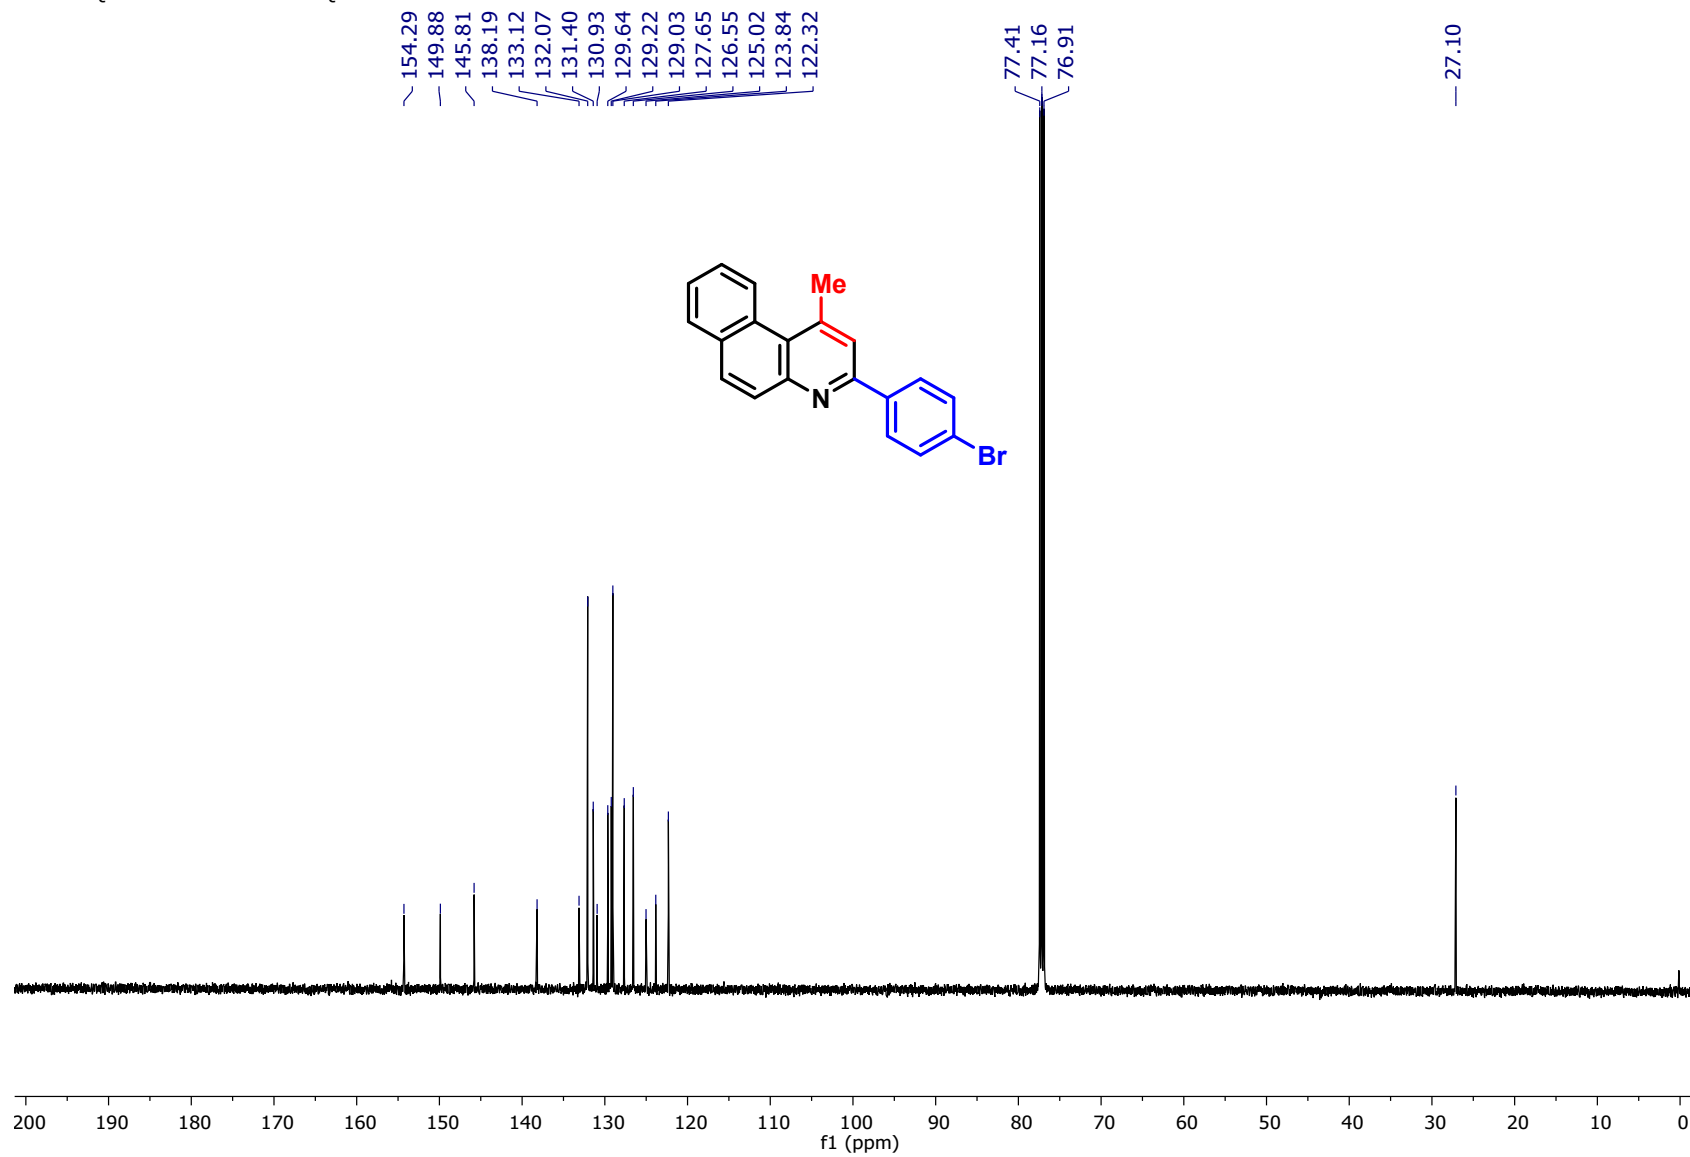

## HRMS spectrum of compound 3m

|             |                      |                        |         |                 |                                   |
|-------------|----------------------|------------------------|---------|-----------------|-----------------------------------|
| Sample Name | ATK-SY-Q26-POS_N     | Position               | P2-B1   | Instrument Name | Instrument 1                      |
| User Name   |                      | Inj Vol                | 10      | InjPosition     |                                   |
| Sample Type | Sample               | IRM Calibration Status | Success | Data Filename   | ATK-SY-Q26-POS_N_111.d            |
| ACQ Method  | FULL SCAN-POSITIVE.m | Comment                |         | Acquired Time   | 27-Jan-23 10:03:30 PM (UTC+05:30) |

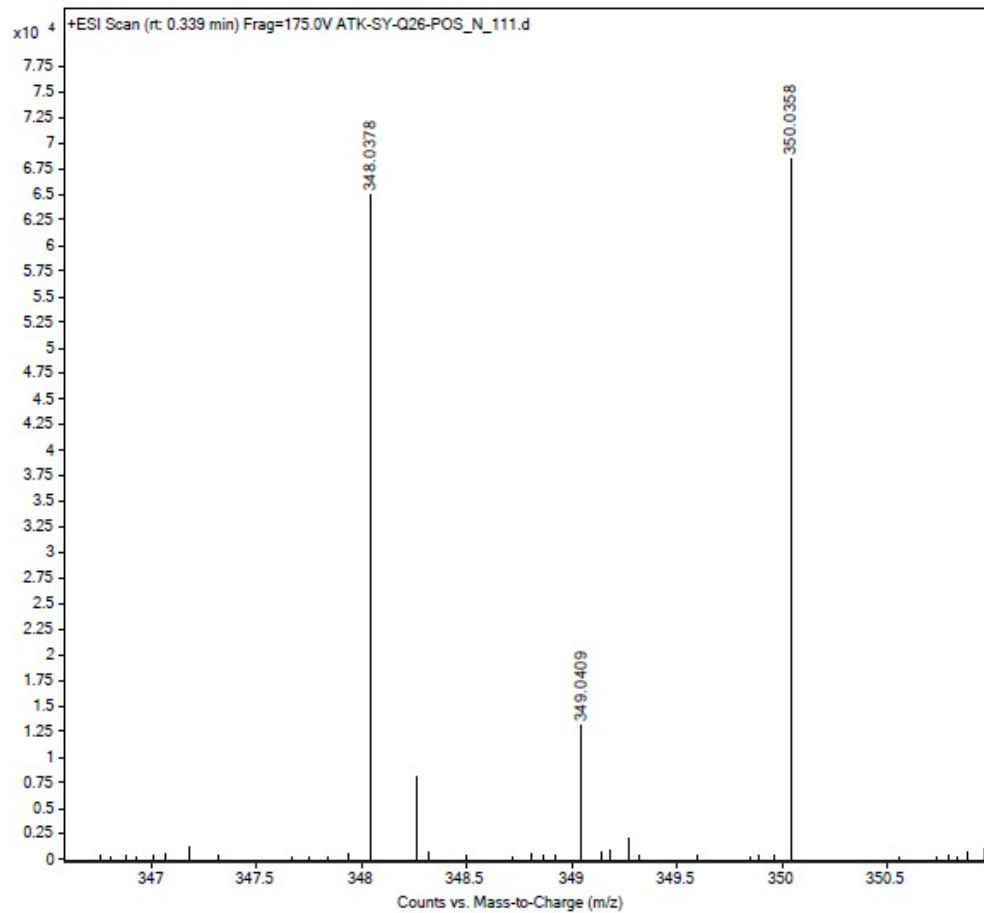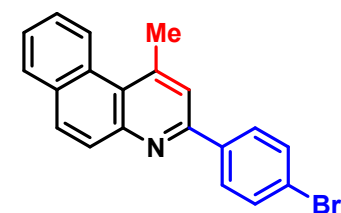

# <sup>1</sup>H NMR (400 MHz, CDCl<sub>3</sub>) spectrum of compound 3n

ATK-SY-Q25-1H.1.fid — ATK-SY-Q25-1H

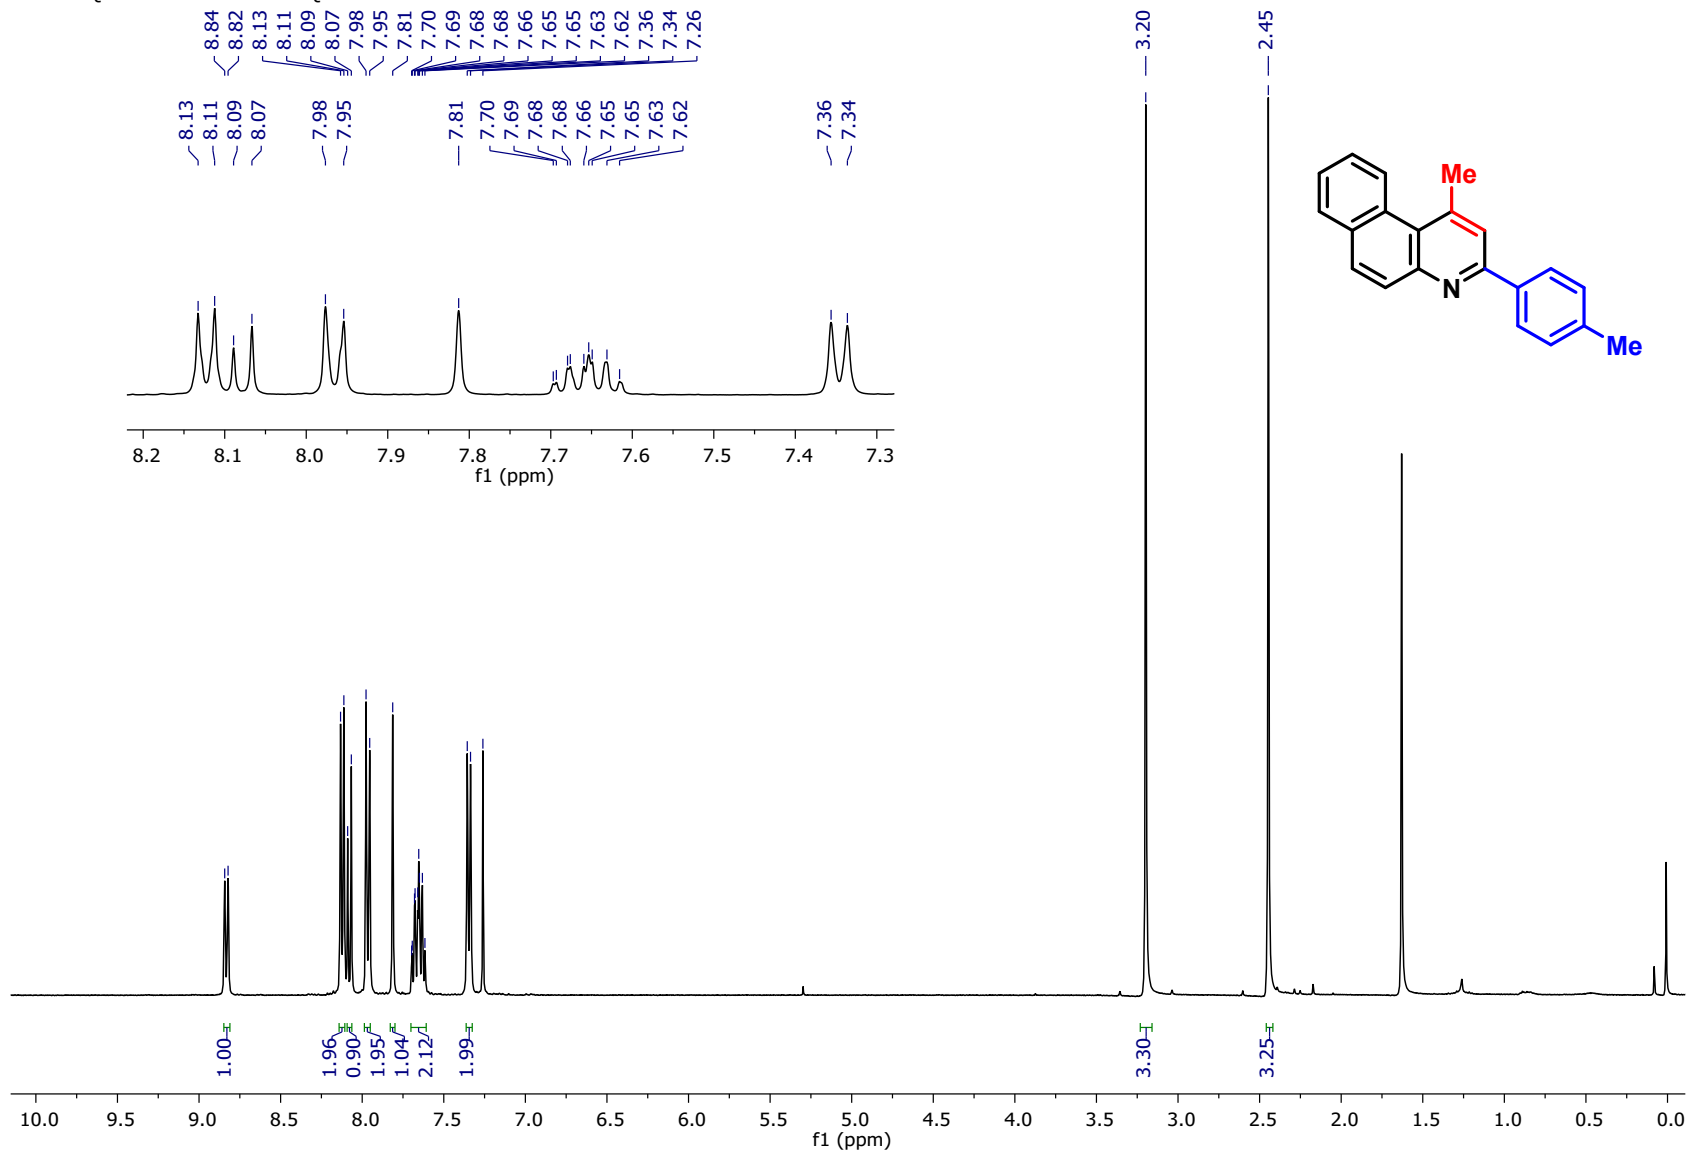

**$^{13}\text{C}\{^1\text{H}\}$  NMR (100 MHz,  $\text{CDCl}_3$ ) spectrum of compound 3n**

ATK-SY-Q25-13C.3.fid — ATK-SY-Q25-13C

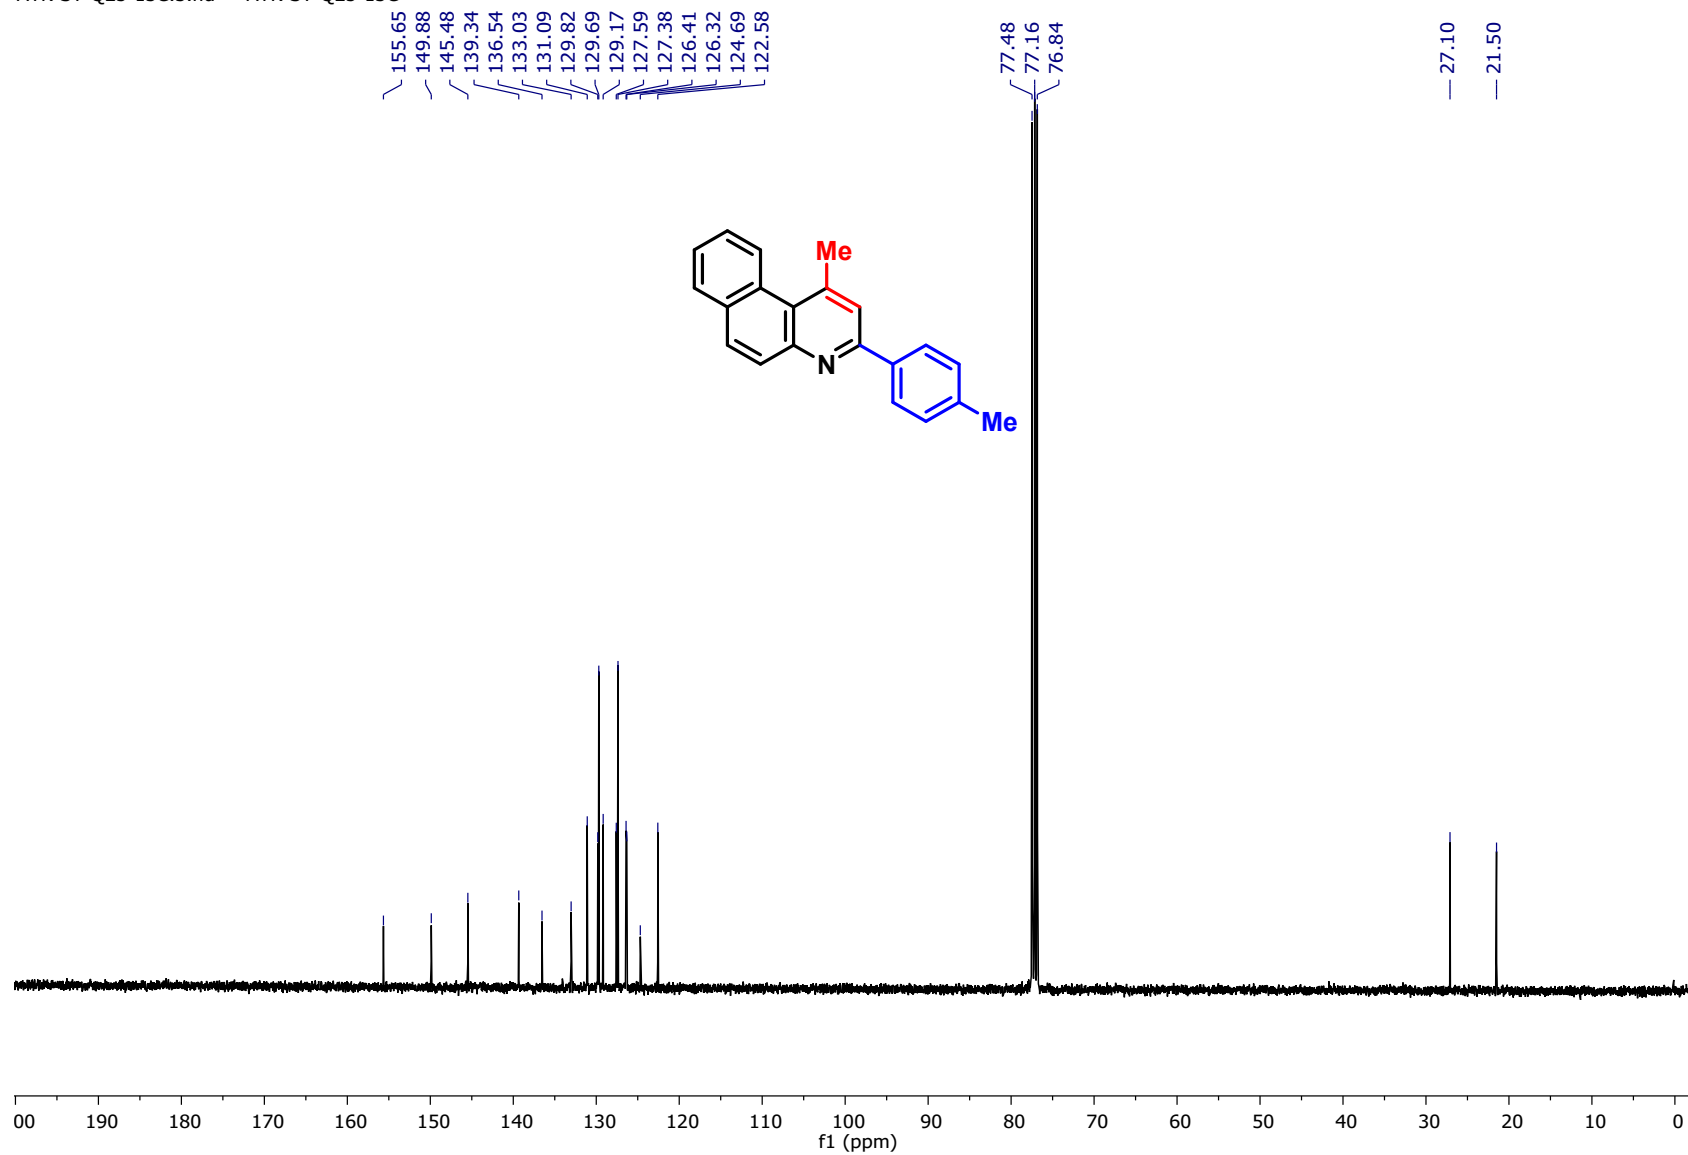

## HRMS spectrum of compound 3n

|                    |                             |                               |         |                        |                                   |
|--------------------|-----------------------------|-------------------------------|---------|------------------------|-----------------------------------|
| <b>Sample Name</b> | Sample12                    | <b>Position</b>               | P1-A11  | <b>Instrument Name</b> | QTOF                              |
| <b>User Name</b>   | SYSTEM (SYSTEM)             | <b>Inj Vol</b>                | 5       | <b>InjPosition</b>     |                                   |
| <b>Sample Type</b> | Sample                      | <b>IRM Calibration Status</b> | Success | <b>Data Filename</b>   | SY-Q25.d                          |
| <b>ACQ Method</b>  | DIRECT MASS_POSITIVE_01_1.m | <b>Comment</b>                |         | <b>Acquired Time</b>   | 27-Jul-23 10:31:08 AM (UTC+05:30) |

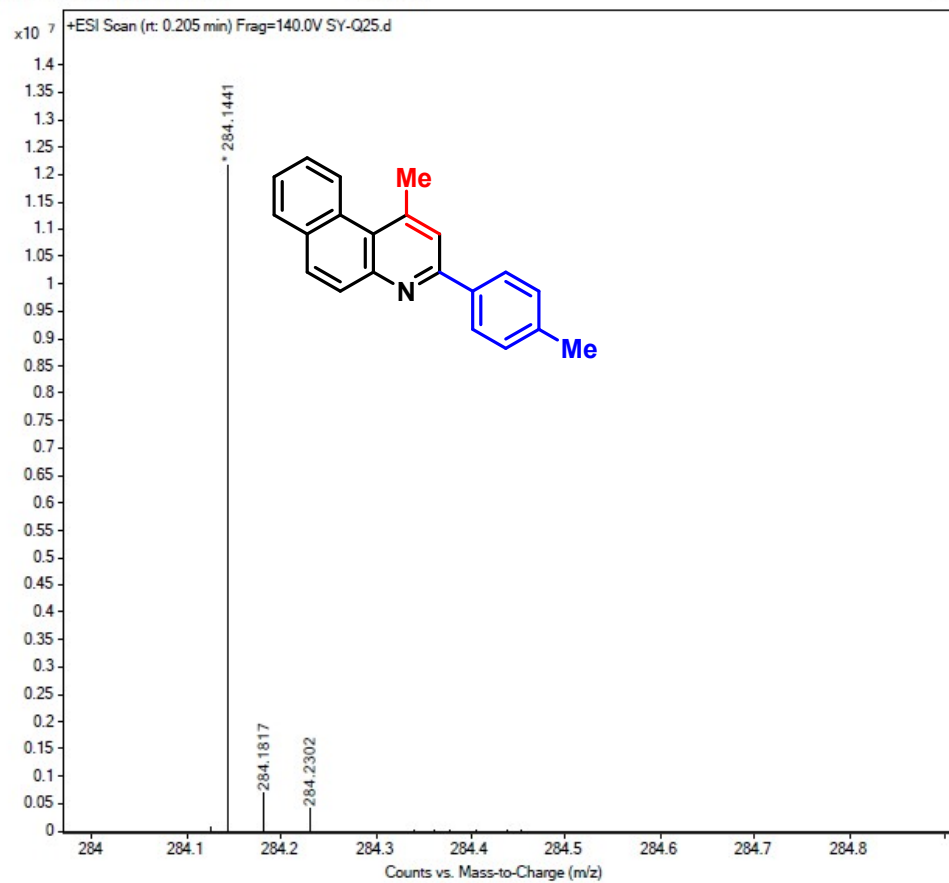



**<sup>1</sup>H NMR (500 MHz, CDCl<sub>3</sub>) spectrum of compound 3o**

ATK-SY-Q18-1H.1.fid — ATK-SY-Q18-1H

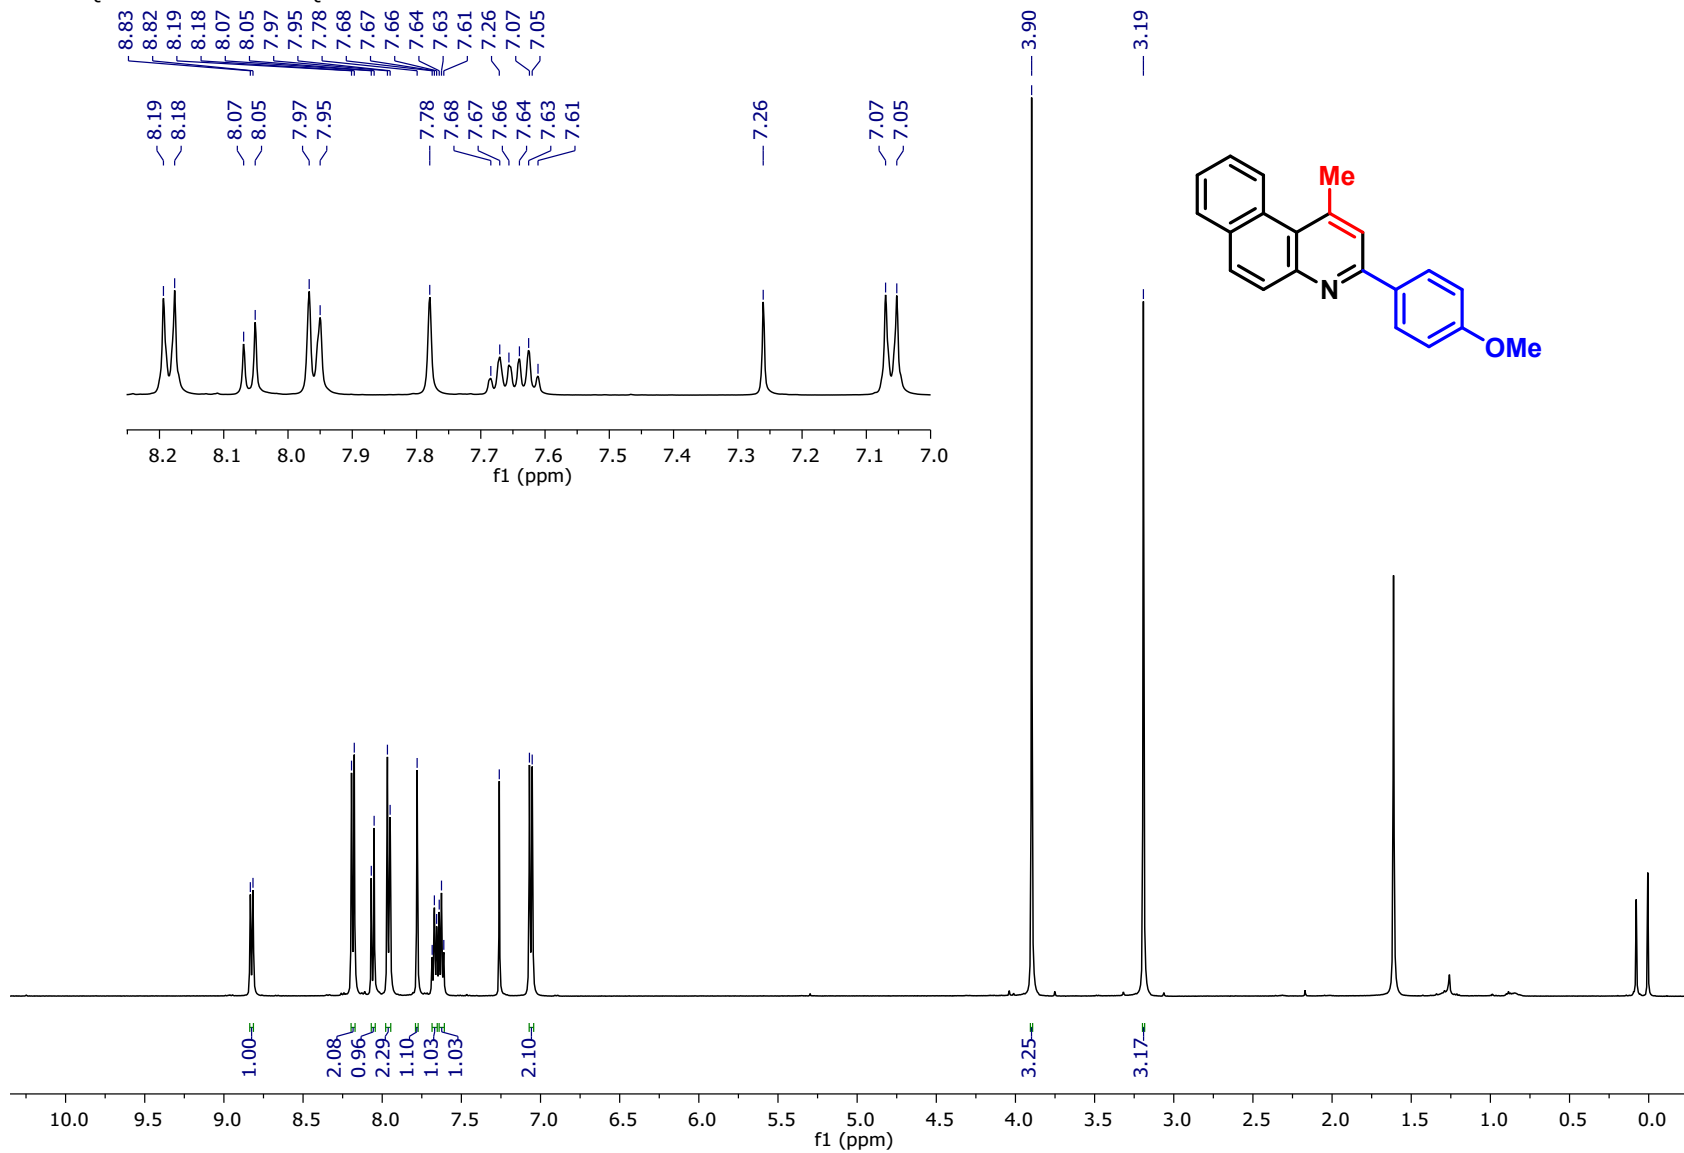

$^{13}\text{C}\{^1\text{H}\}$  NMR (125 MHz,  $\text{CDCl}_3$ ) spectrum of compound 3o

ATK-SY-Q18-13C.3.fid — ATK-SY-Q18-13C

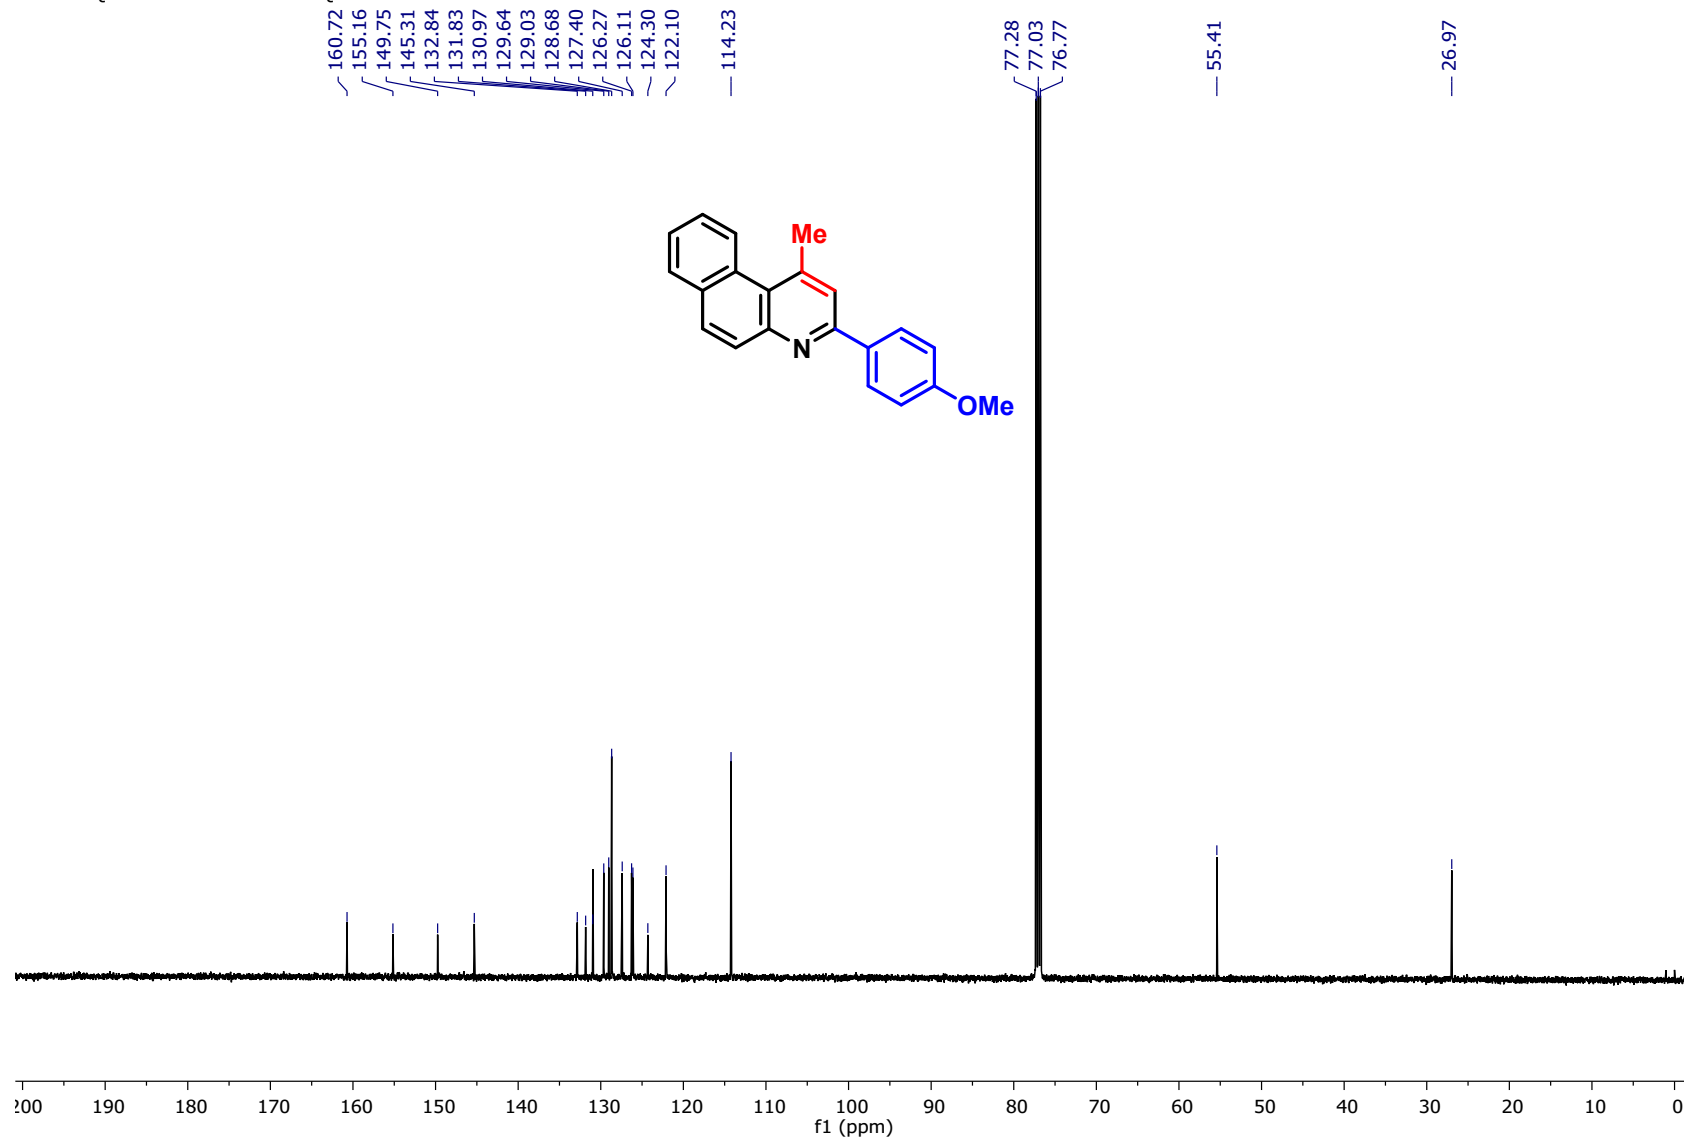

## HRMS spectrum of compound 3o

|             |                      |                        |         |                 |                                   |
|-------------|----------------------|------------------------|---------|-----------------|-----------------------------------|
| Sample Name | ATK-SY-Q18-POS_N     | Position               | P1-F9   | Instrument Name | Instrument 1                      |
| User Name   |                      | Inj Vol                | 10      | InjPosition     |                                   |
| Sample Type | Sample               | IRM Calibration Status | Success | Data Filename   | ATK-SY-Q18-POS_N_108.d            |
| ACQ Method  | FULL SCAN-POSITIVE.m | Comment                |         | Acquired Time   | 27-Jan-23 09:58:41 PM (UTC+05:30) |

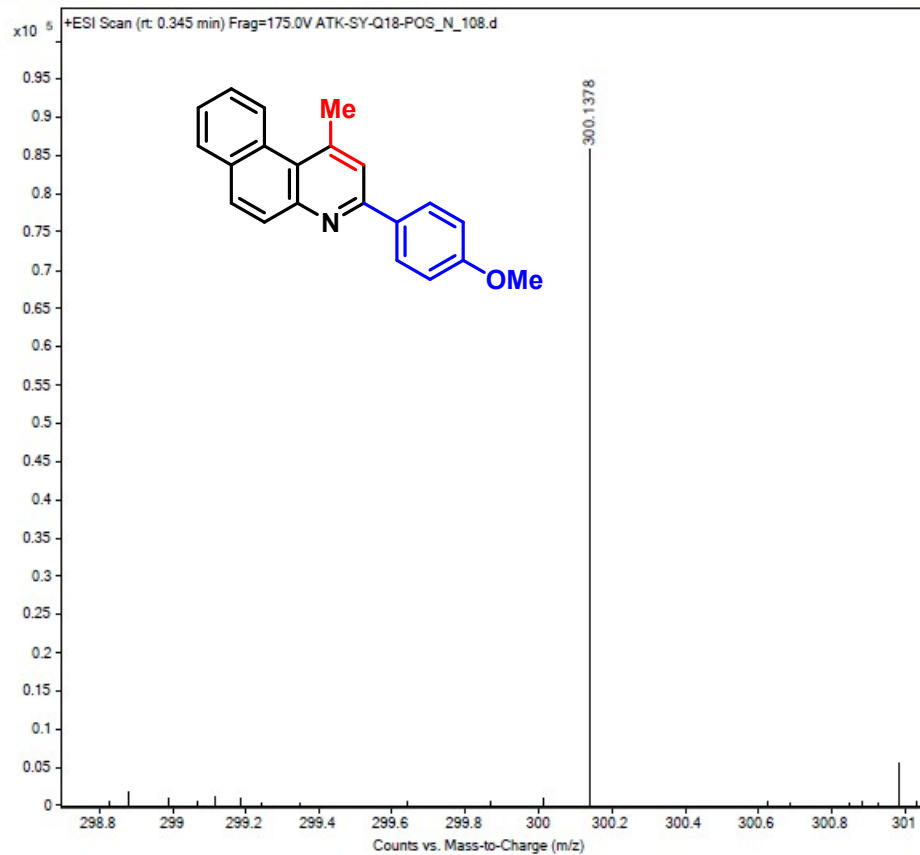

# <sup>1</sup>H NMR (400 MHz, CDCl<sub>3</sub>) spectrum of compound 3p

ATK-SY-P60S-1H.1.fid — ATK-SY-P60S-1H

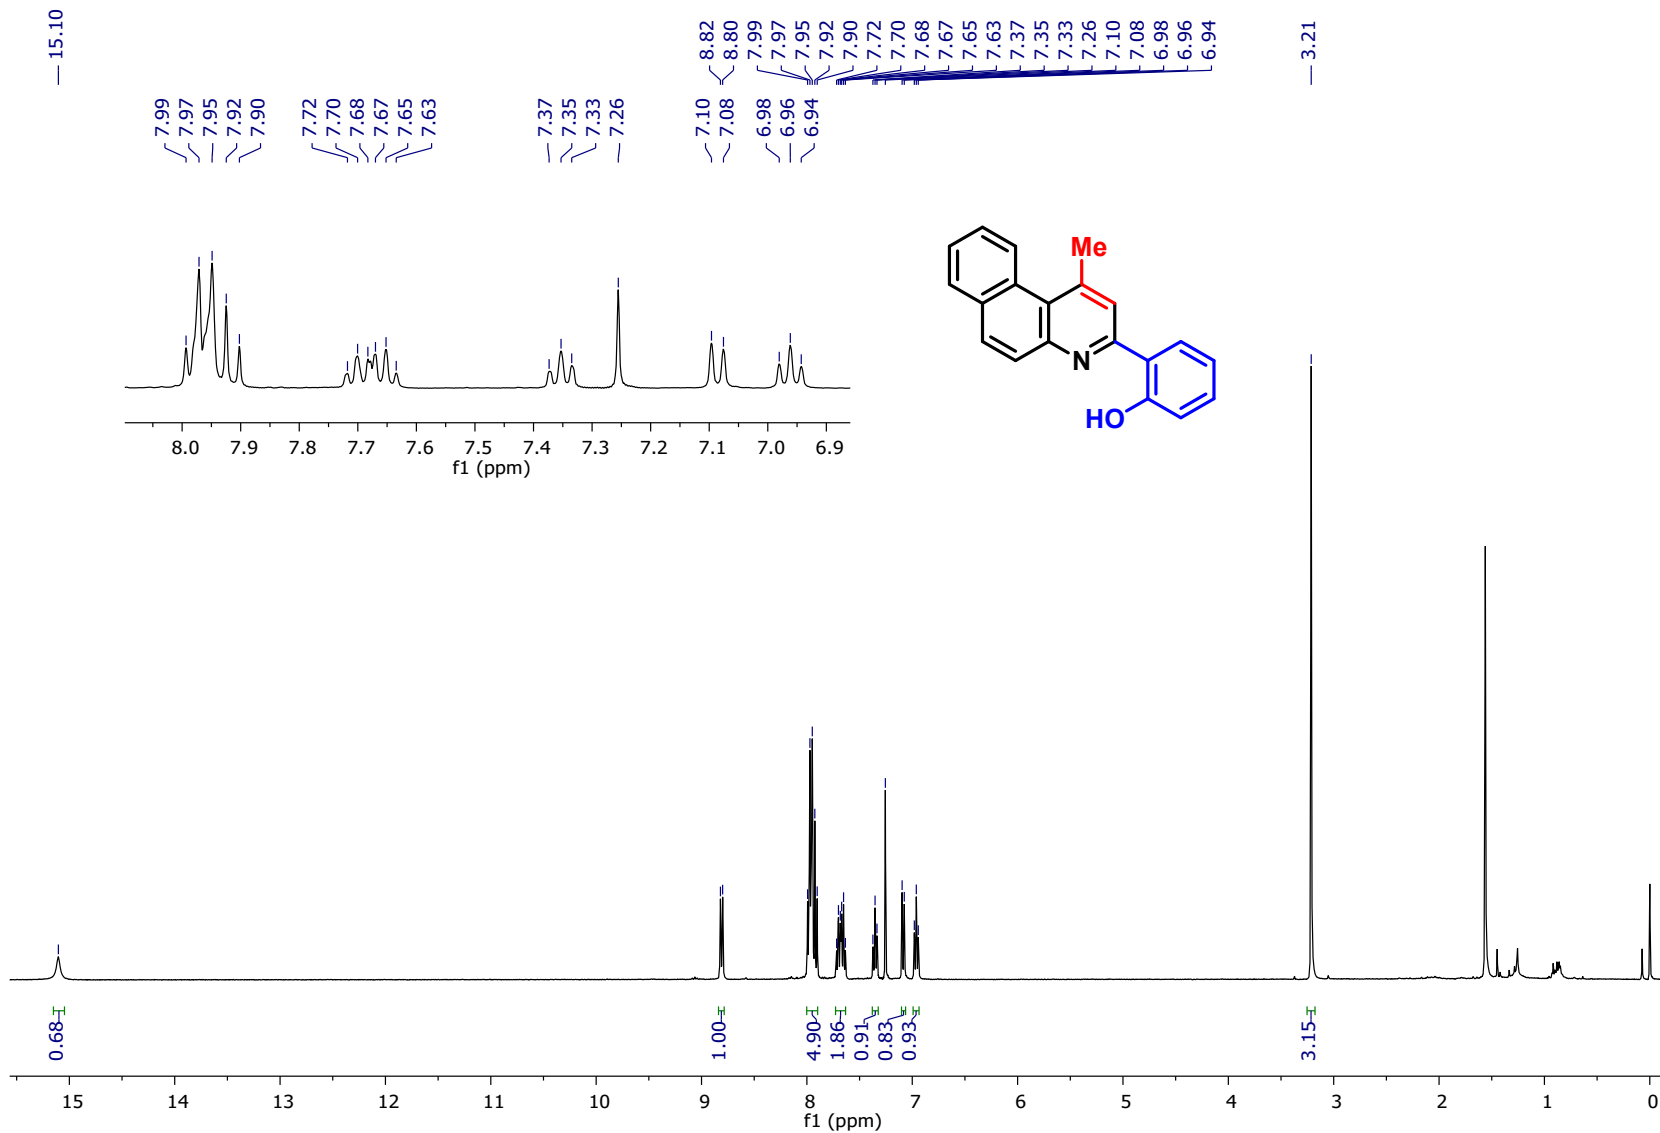

$^{13}\text{C}\{^1\text{H}\}$  NMR (125 MHz,  $\text{CDCl}_3$ ) spectrum of compound 3p

ATK-SY-P60S-13C.1.fid — ATK-SY-P60S-13C

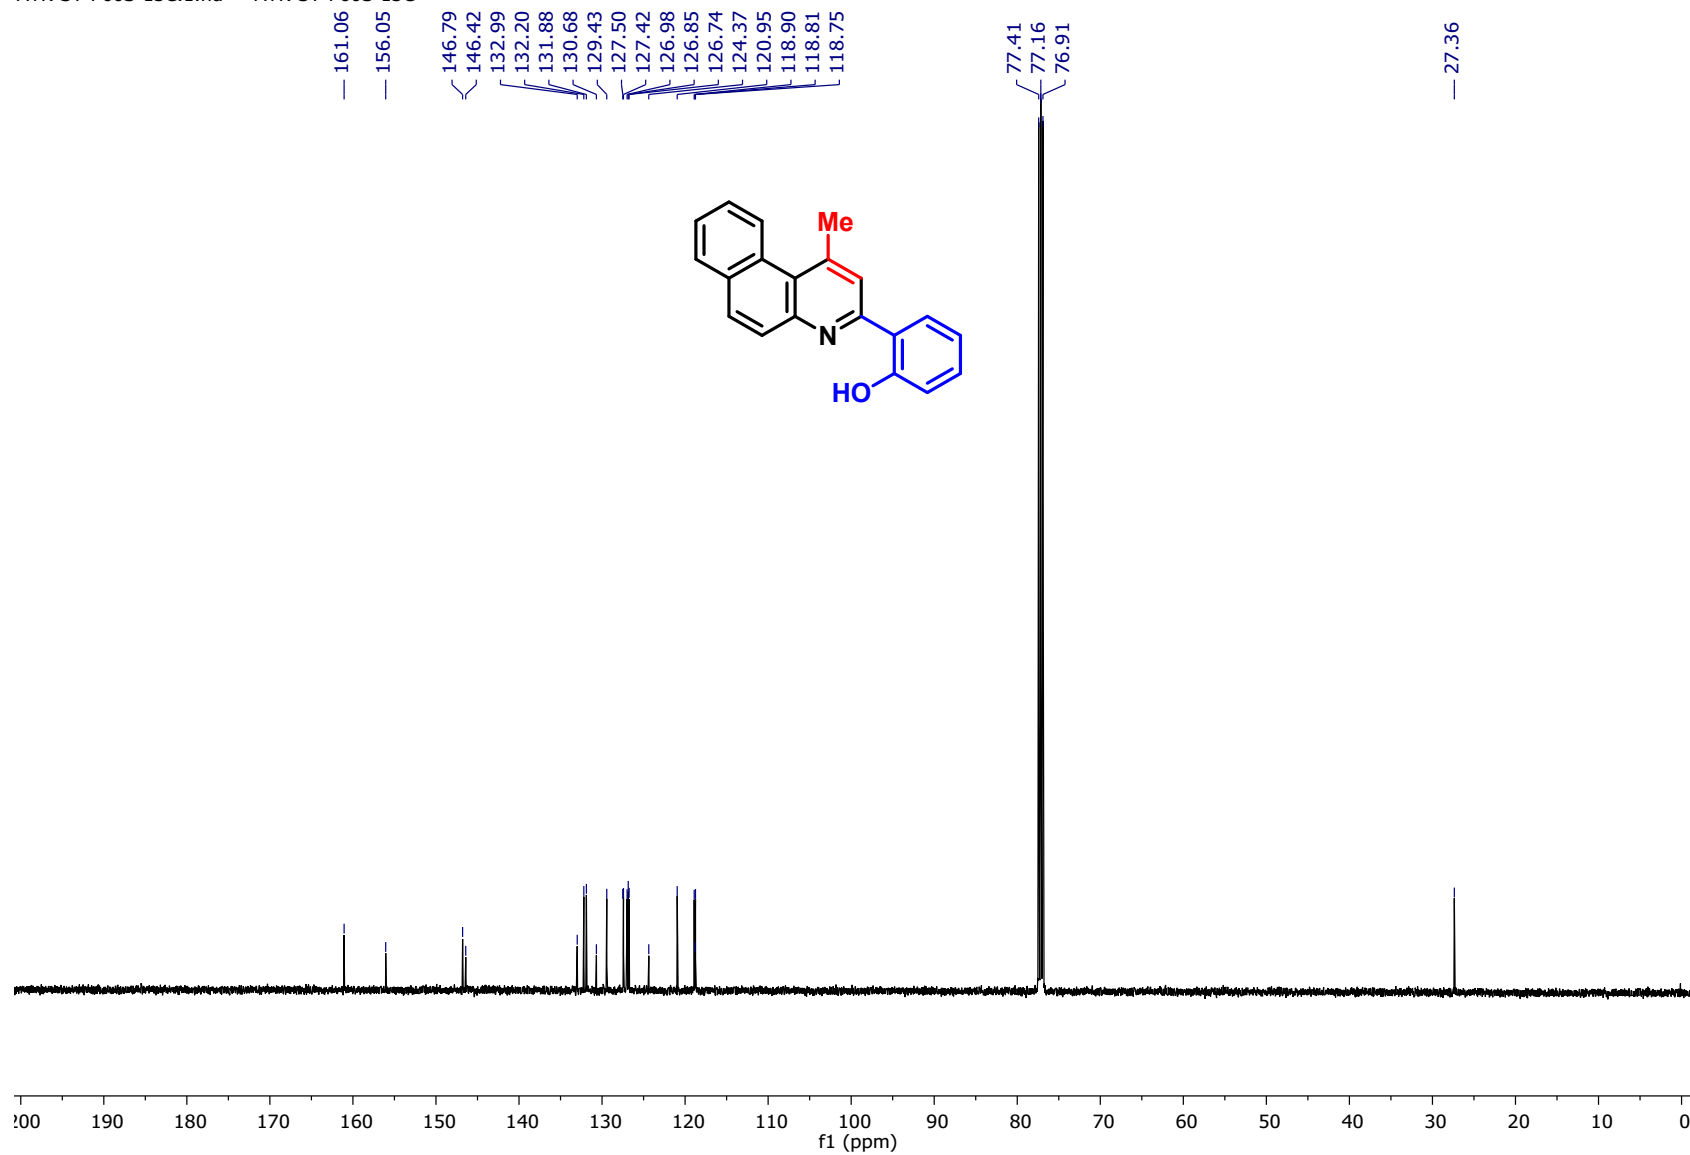

# HRMS spectrum of compound 3p

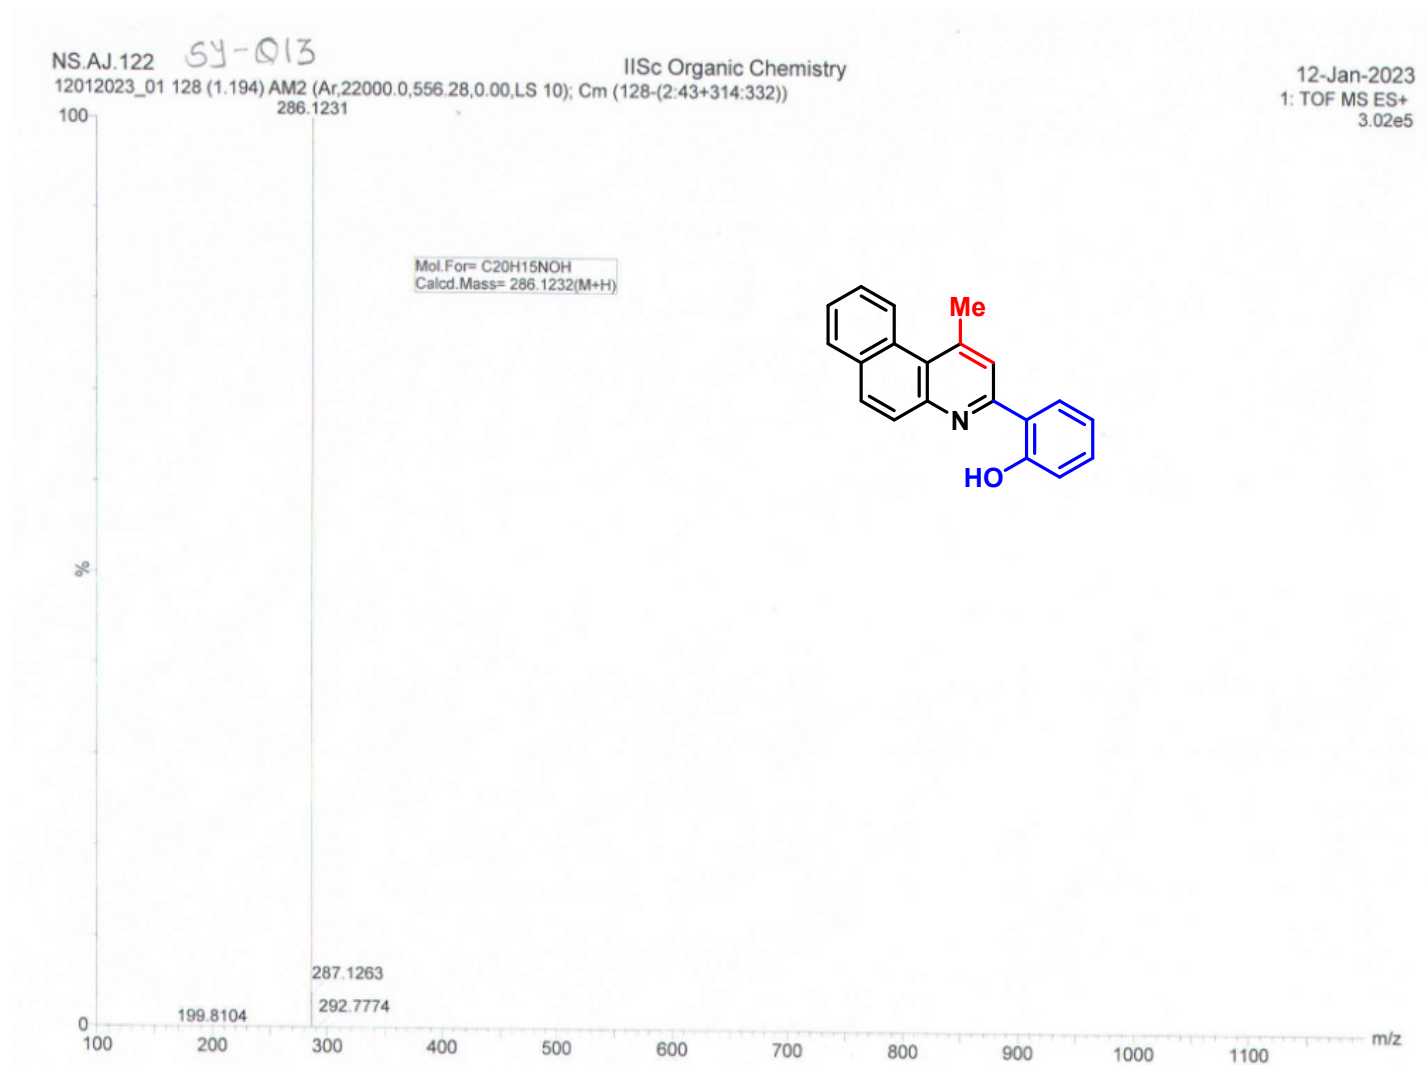

# <sup>1</sup>H NMR (500 MHz, CDCl<sub>3</sub>) spectrum of compound 3q

AD-SY-Q27-1H.1.fid — AD-SY-Q27-1H

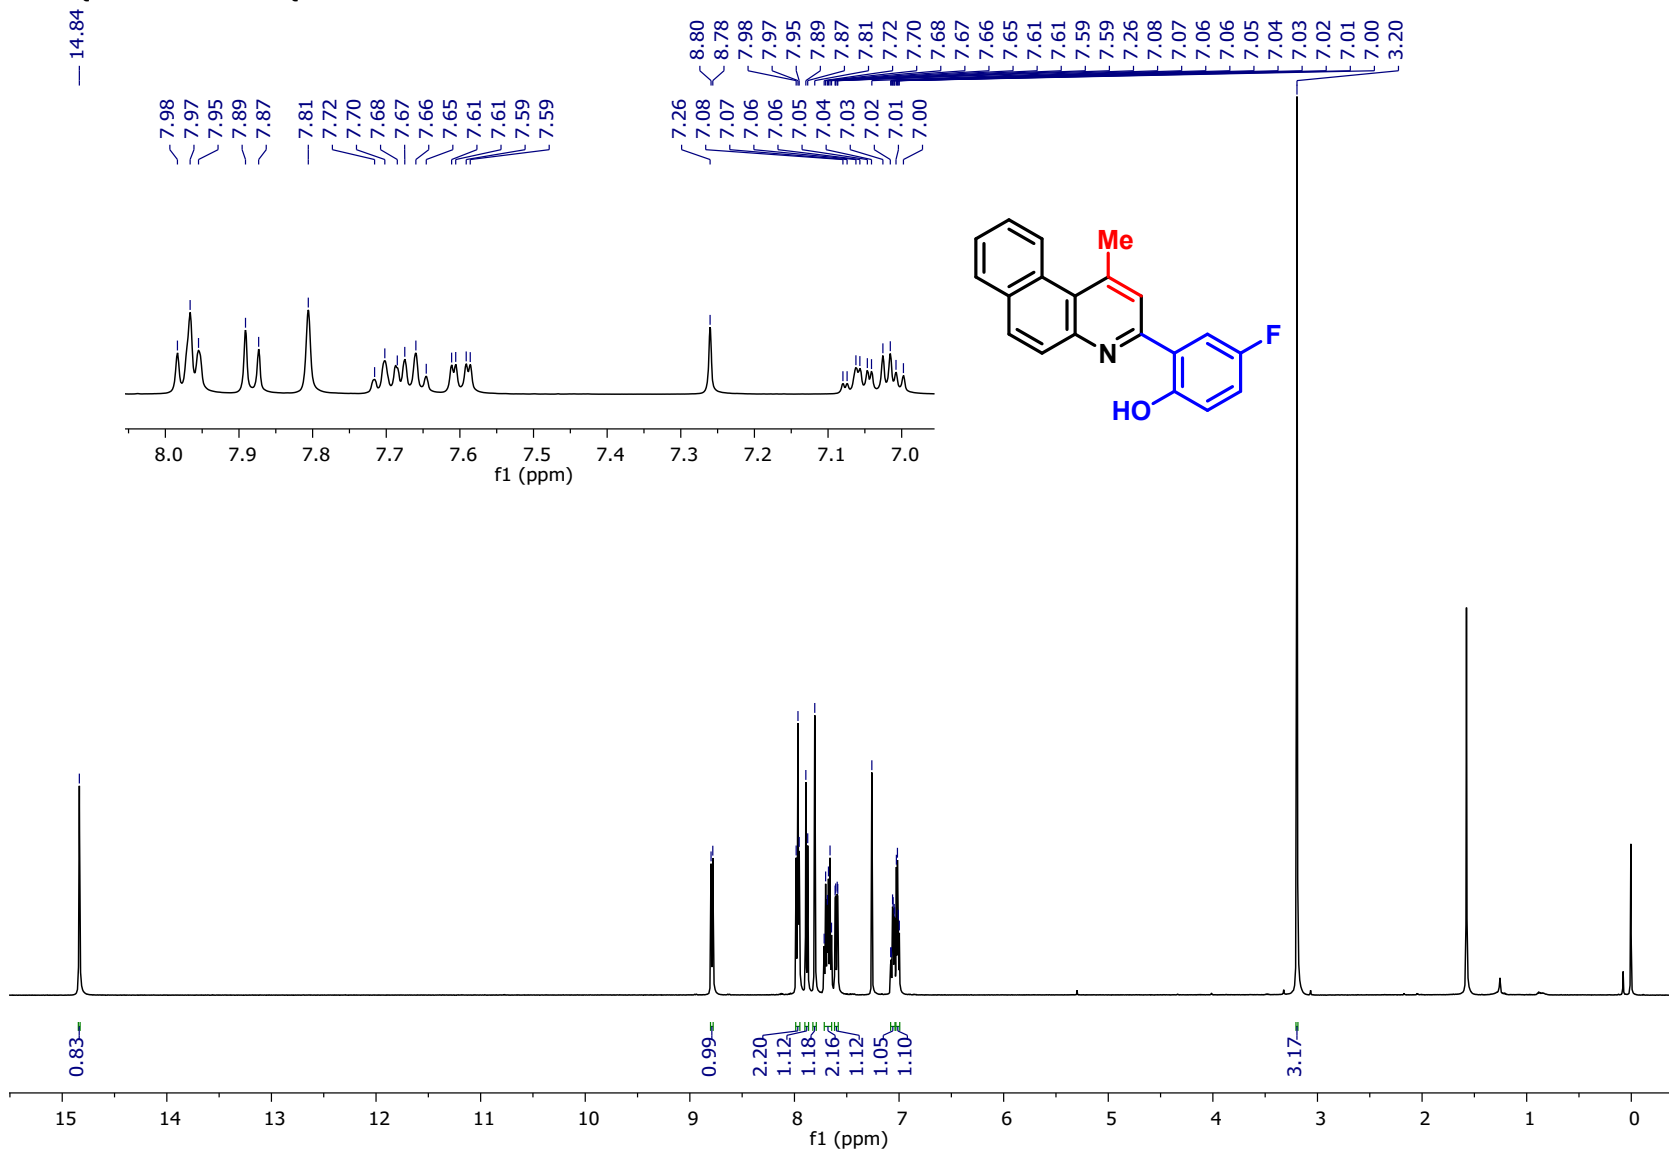

$^{13}\text{C}\{^1\text{H}\}$  NMR (125 MHz,  $\text{CDCl}_3$ ) spectrum of compound 3q

AD-SY-Q27-13C.3.fid — AD-SY-Q27-13C

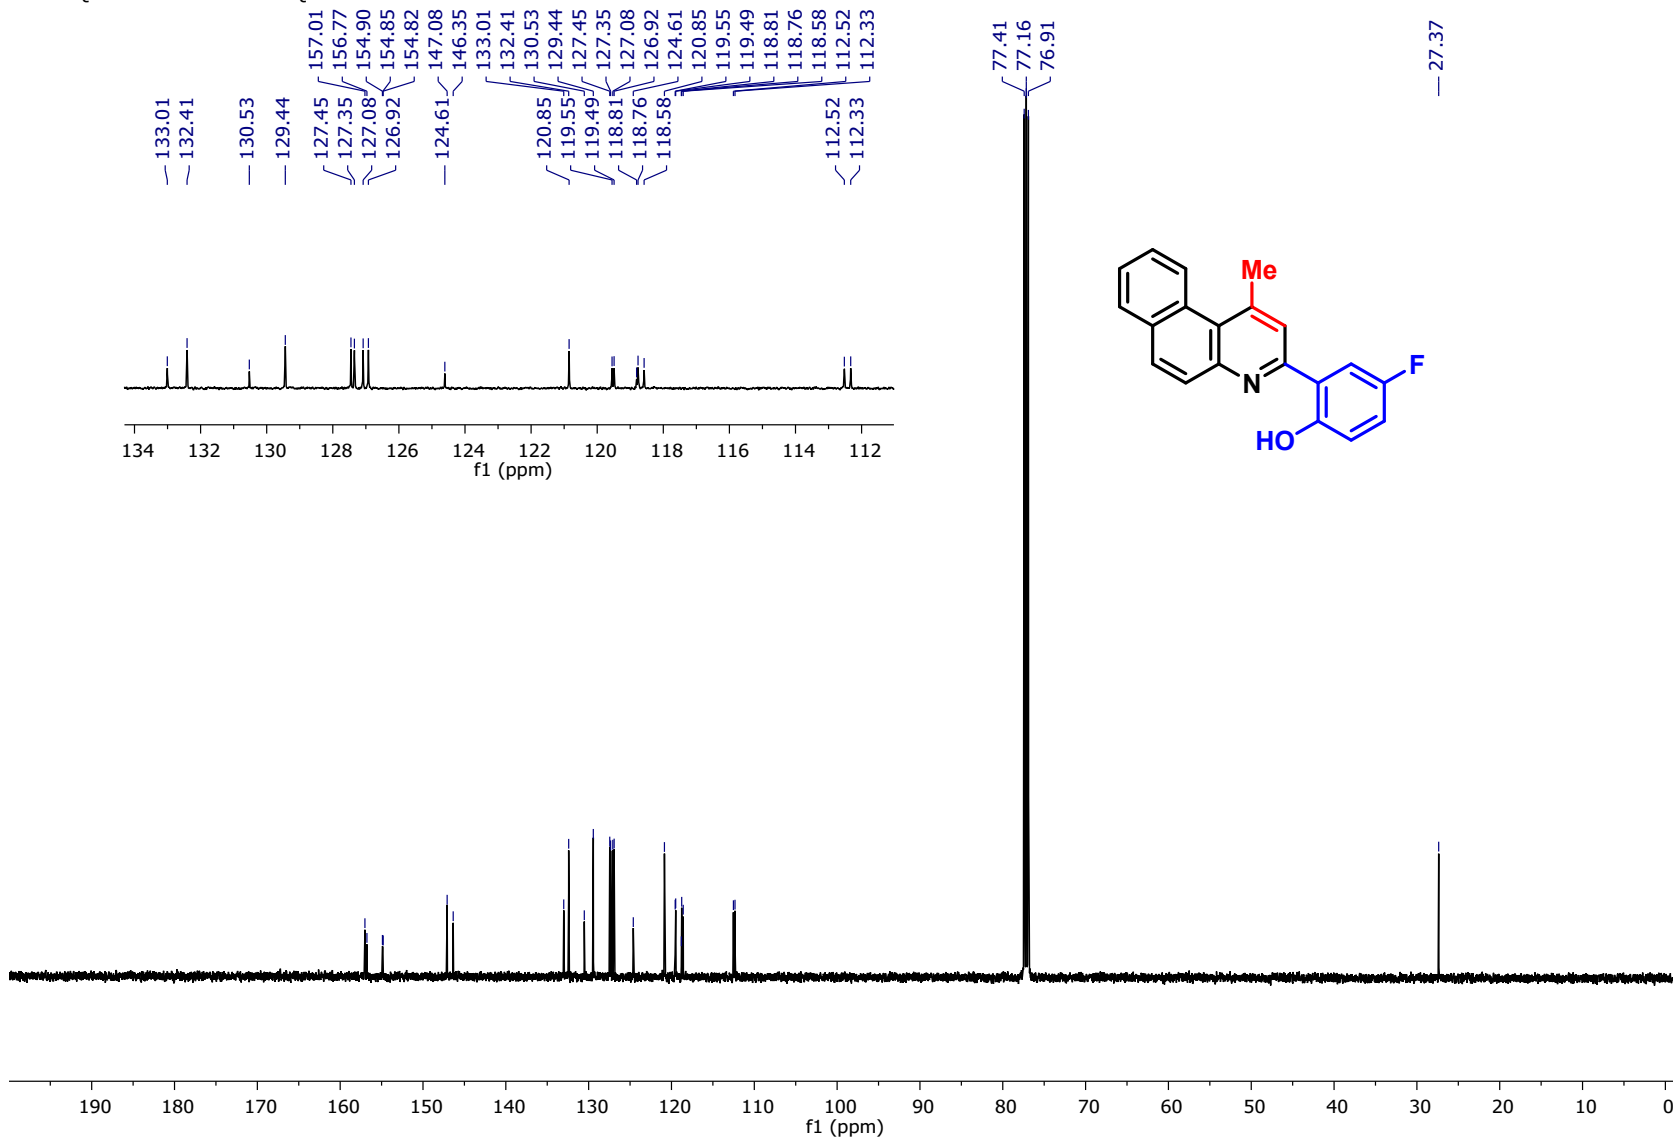



**<sup>19</sup>F NMR (471 MHz, CDCl<sub>3</sub>) spectrum of compound 3q**

SY-Q27-19F.1.fid — SY-Q27-19F

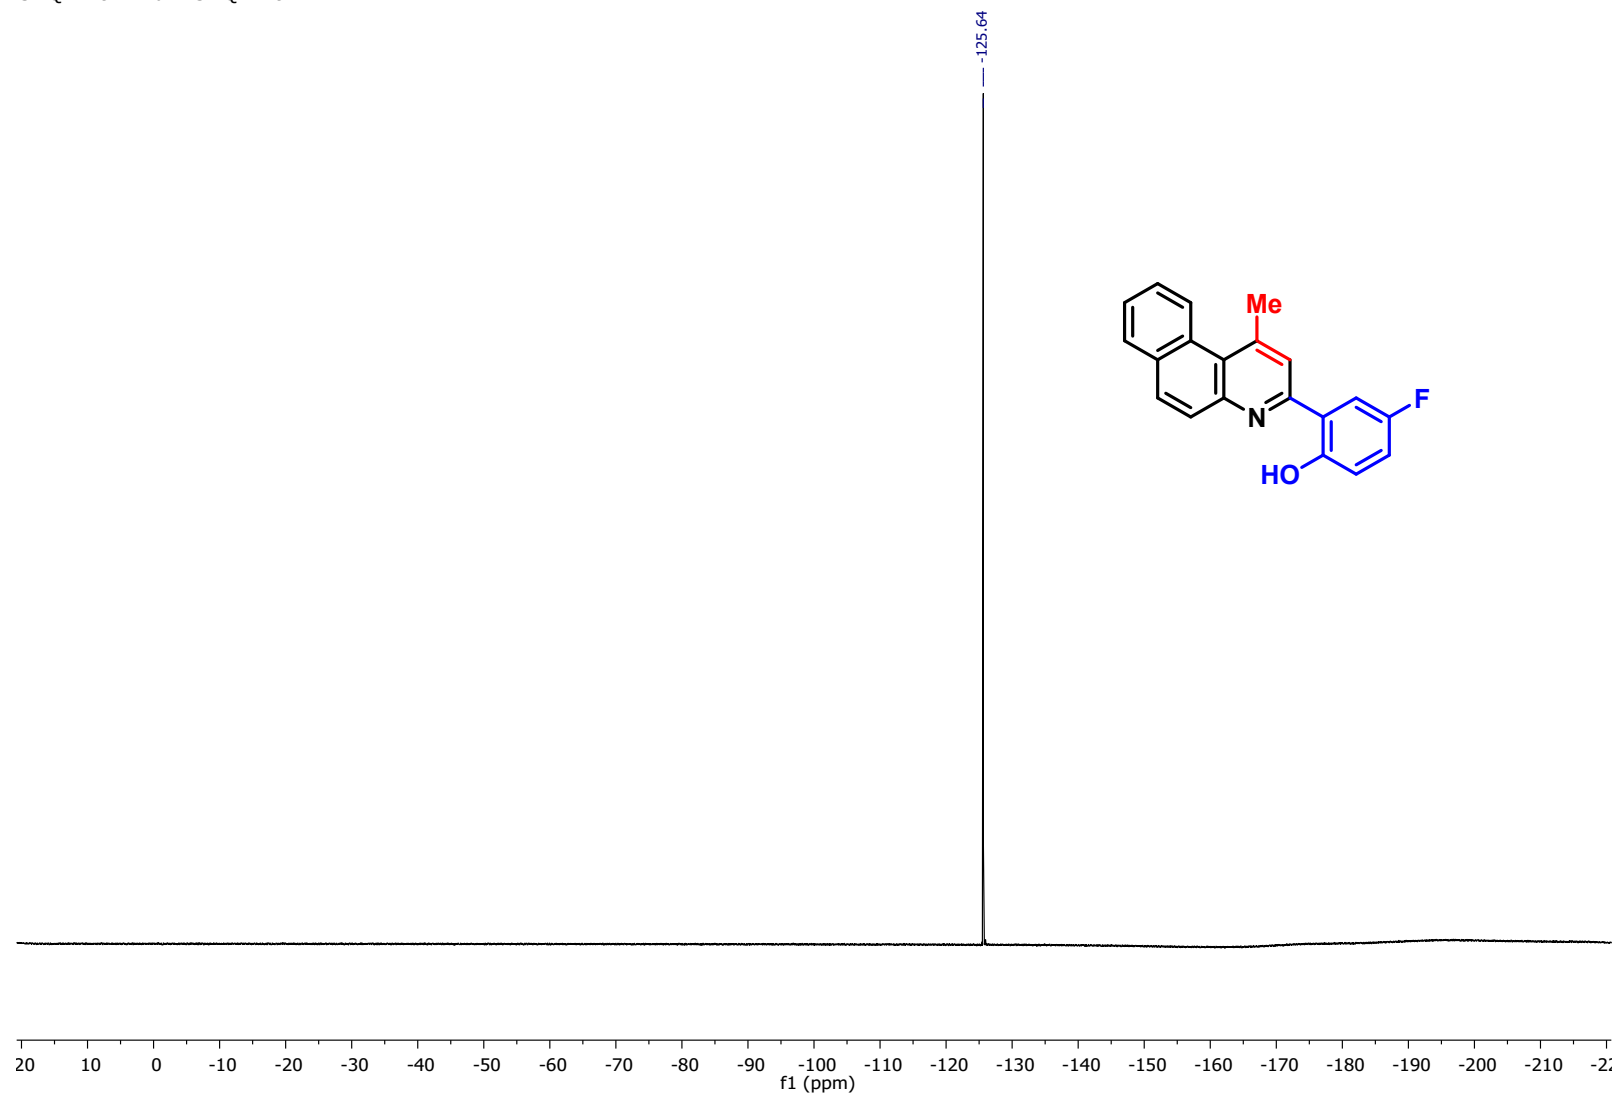

## HRMS spectrum of compound 3q

|             |                      |                        |         |                 |                                   |
|-------------|----------------------|------------------------|---------|-----------------|-----------------------------------|
| Sample Name | ATK_SY_Q27_POS       | Position               | P1-D1   | Instrument Name | Instrument 1                      |
| User Name   |                      | Inj Vol                | 10      | InjPosition     |                                   |
| Sample Type | Sample               | IRM Calibration Status | Success | Data Filename   | ATK_SY_Q27_POS_005.d              |
| ACQ Method  | FULL SCAN-POSITIVE.m | Comment                |         | Acquired Time   | 28-Feb-23 05:09:23 PM (UTC+05:30) |

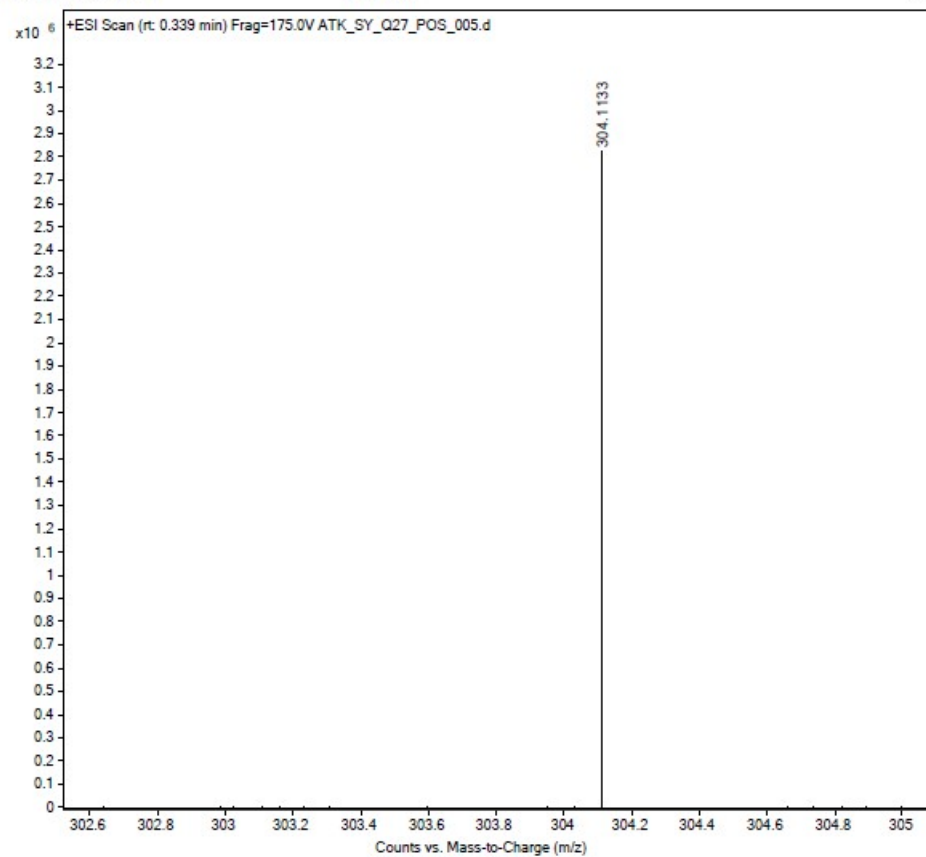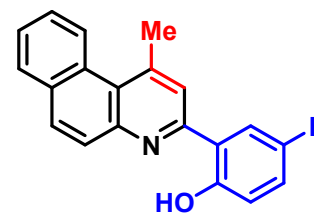

**<sup>1</sup>H NMR (500 MHz, CDCl<sub>3</sub>) spectrum of compound 3r**

ATK-SY-Q20-1H.1.fid — ATK-SY-Q20-1H

8.85  
8.83  
8.03  
8.01  
8.01  
7.99  
7.97  
7.95  
7.94  
7.93  
7.92  
7.75  
7.73  
7.71  
7.70  
7.69  
7.67  
7.31  
7.30  
7.29  
7.28  
7.26  
7.04  
7.02

— 3.25

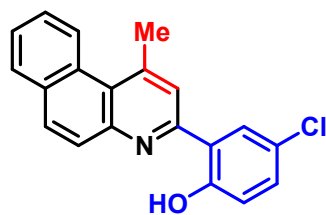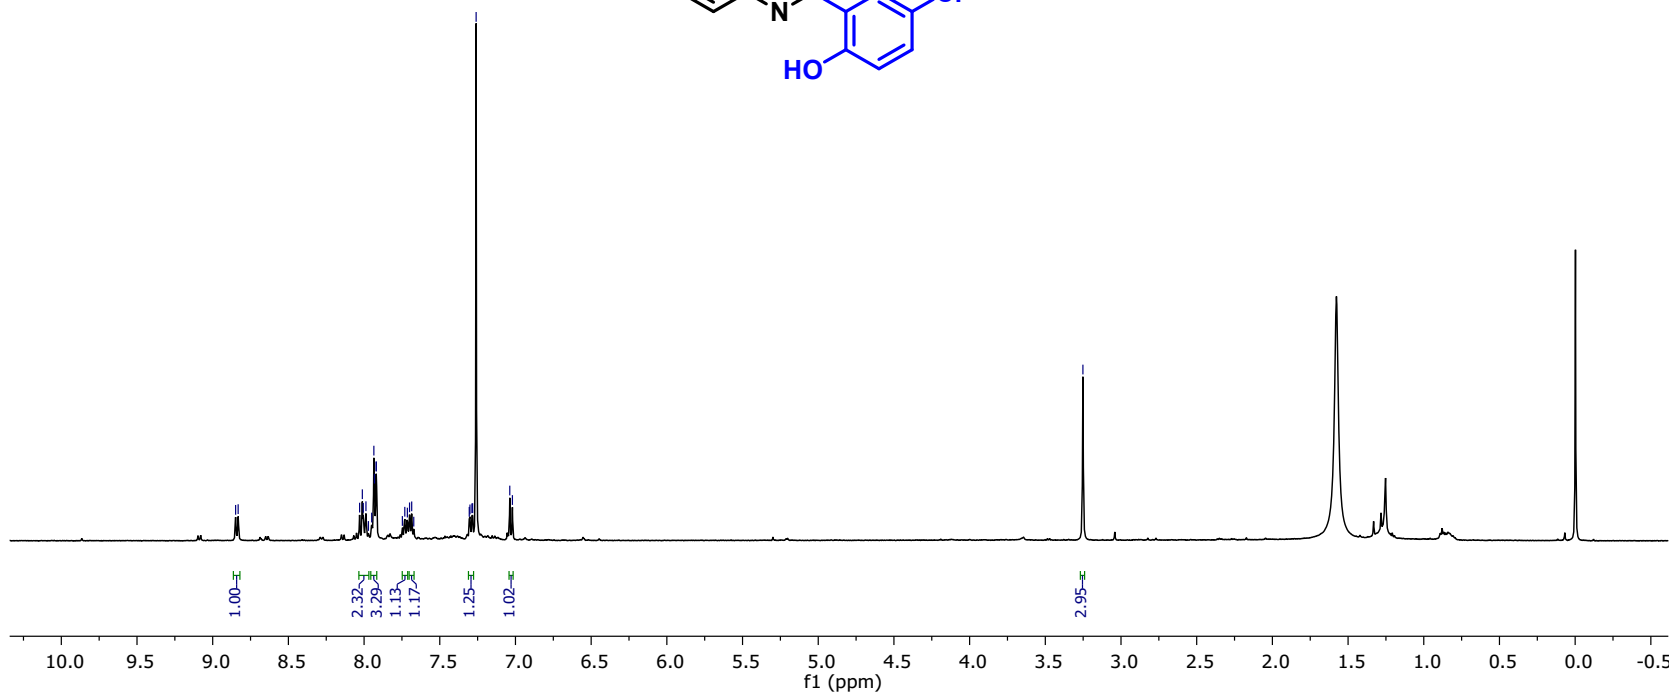

$^{13}\text{C}\{^1\text{H}\}$  NMR (125 MHz,  $\text{CDCl}_3$ ) spectrum of compound 3r

ATK-SY-Q20-13C.1.fid — ATK-SY-Q20-13C

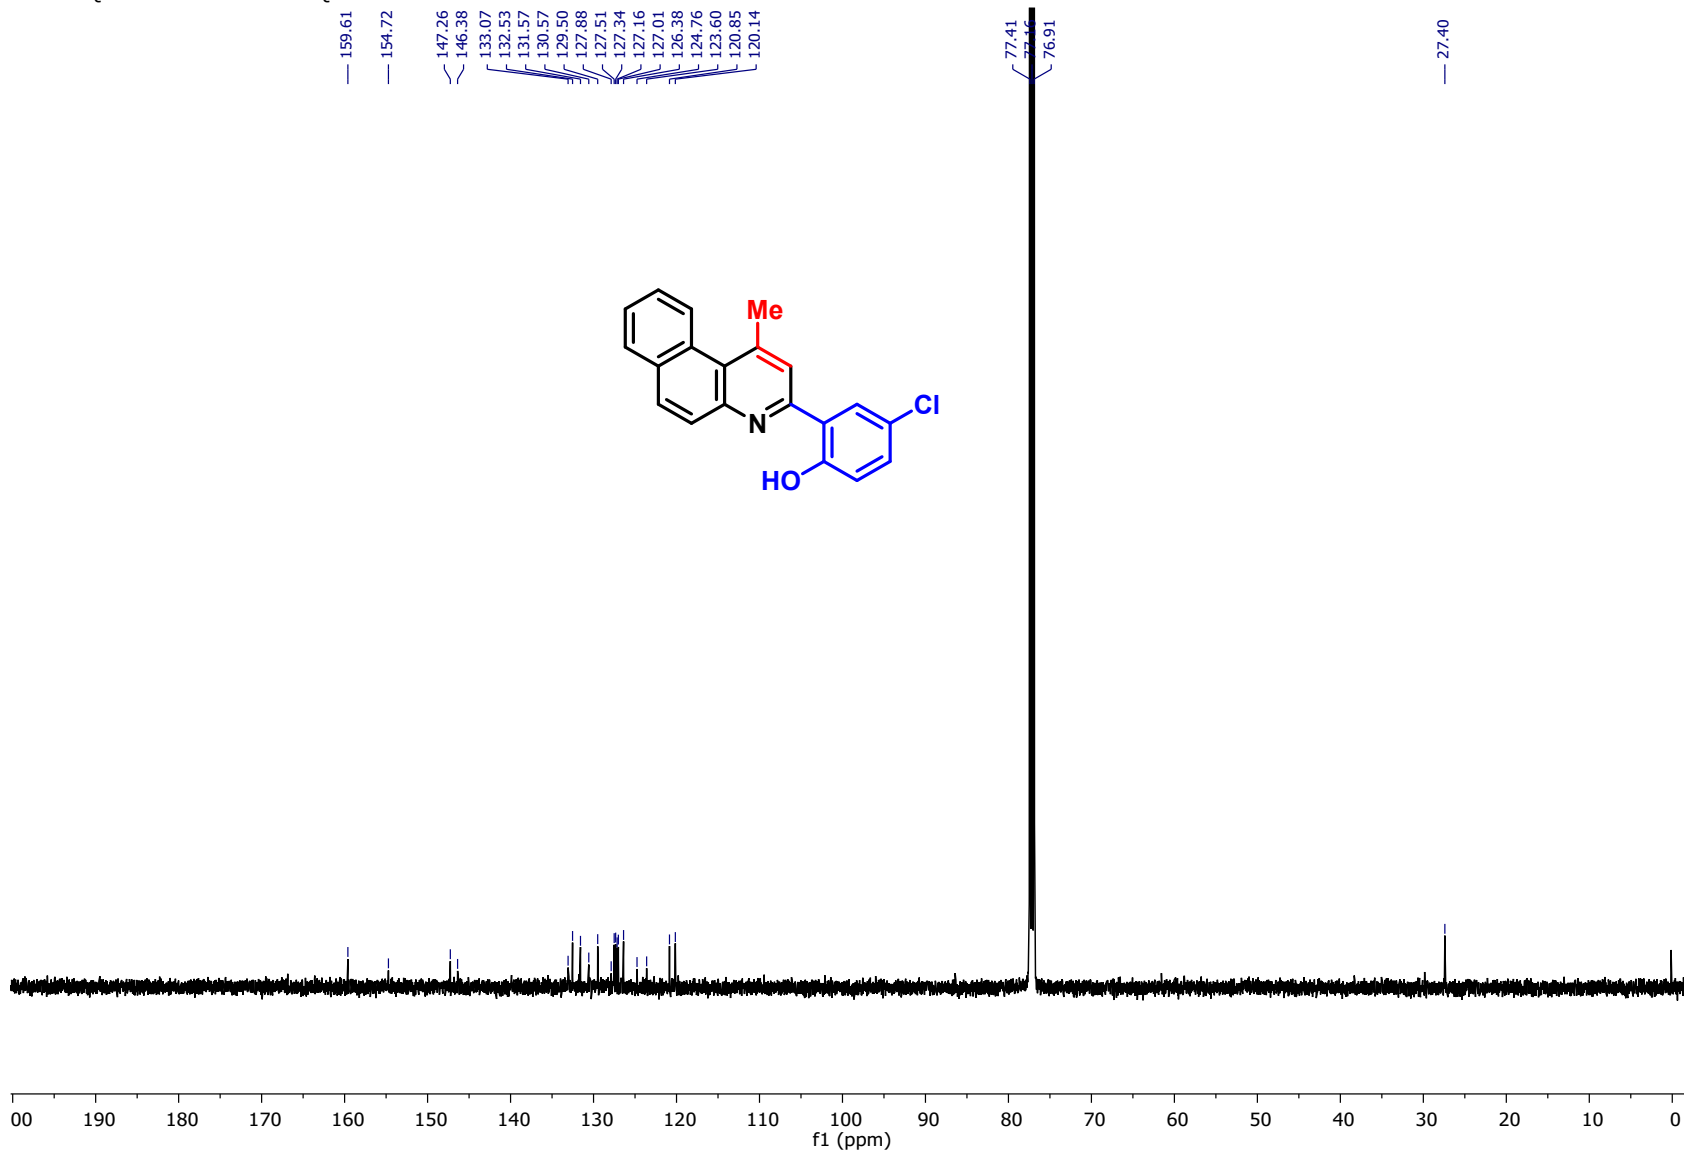

## HRMS spectrum of compound 3r

|             |                      |                        |         |                 |                                   |
|-------------|----------------------|------------------------|---------|-----------------|-----------------------------------|
| Sample Name | ATK_SY_Q20_POS       | Position               | P1-D7   | Instrument Name | Instrument 1                      |
| User Name   |                      | Inj Vol                | 10      | InjPosition     |                                   |
| Sample Type | Sample               | IRM Calibration Status | Success | Data Filename   | ATK_SY_Q20_POS_012.d              |
| ACQ Method  | FULL SCAN-POSITIVE.m | Comment                |         | Acquired Time   | 28-Feb-23 05:20:49 PM (UTC+05:30) |

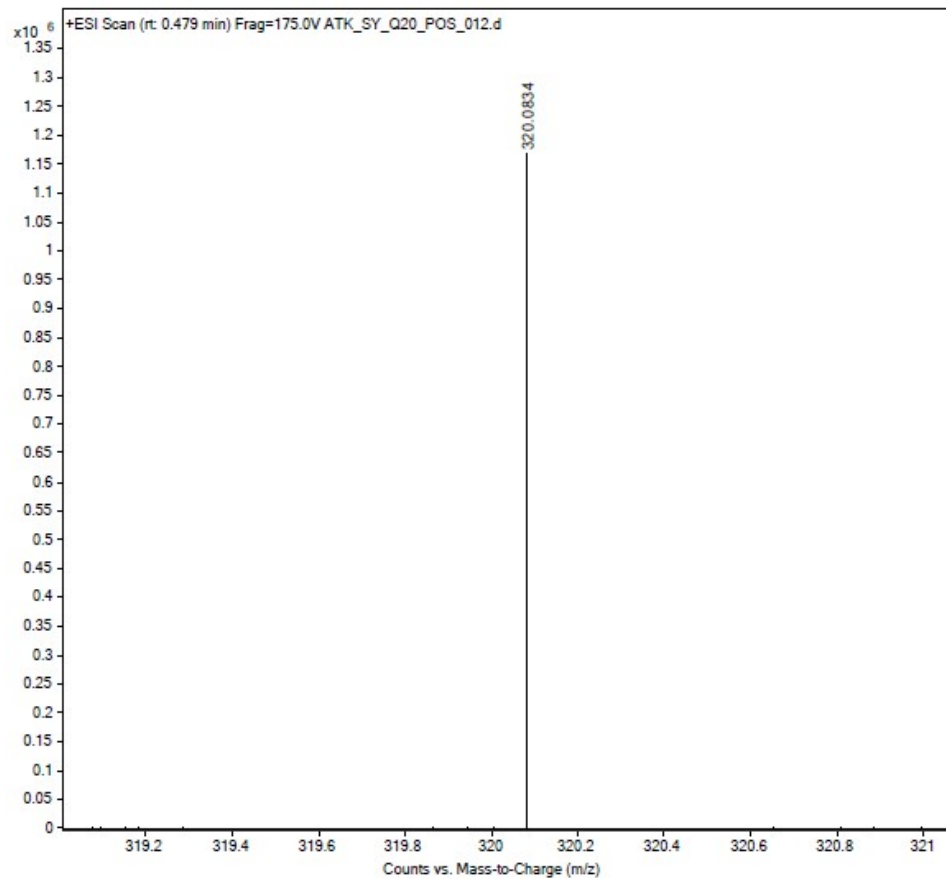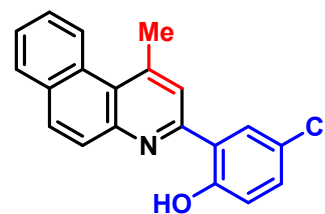

**<sup>1</sup>H NMR (400 MHz, DMSO-*d*<sub>6</sub>) spectrum of compound 3s**

ATK-SY-Q32-1H.1.fid — ATK-SY-Q32-1H

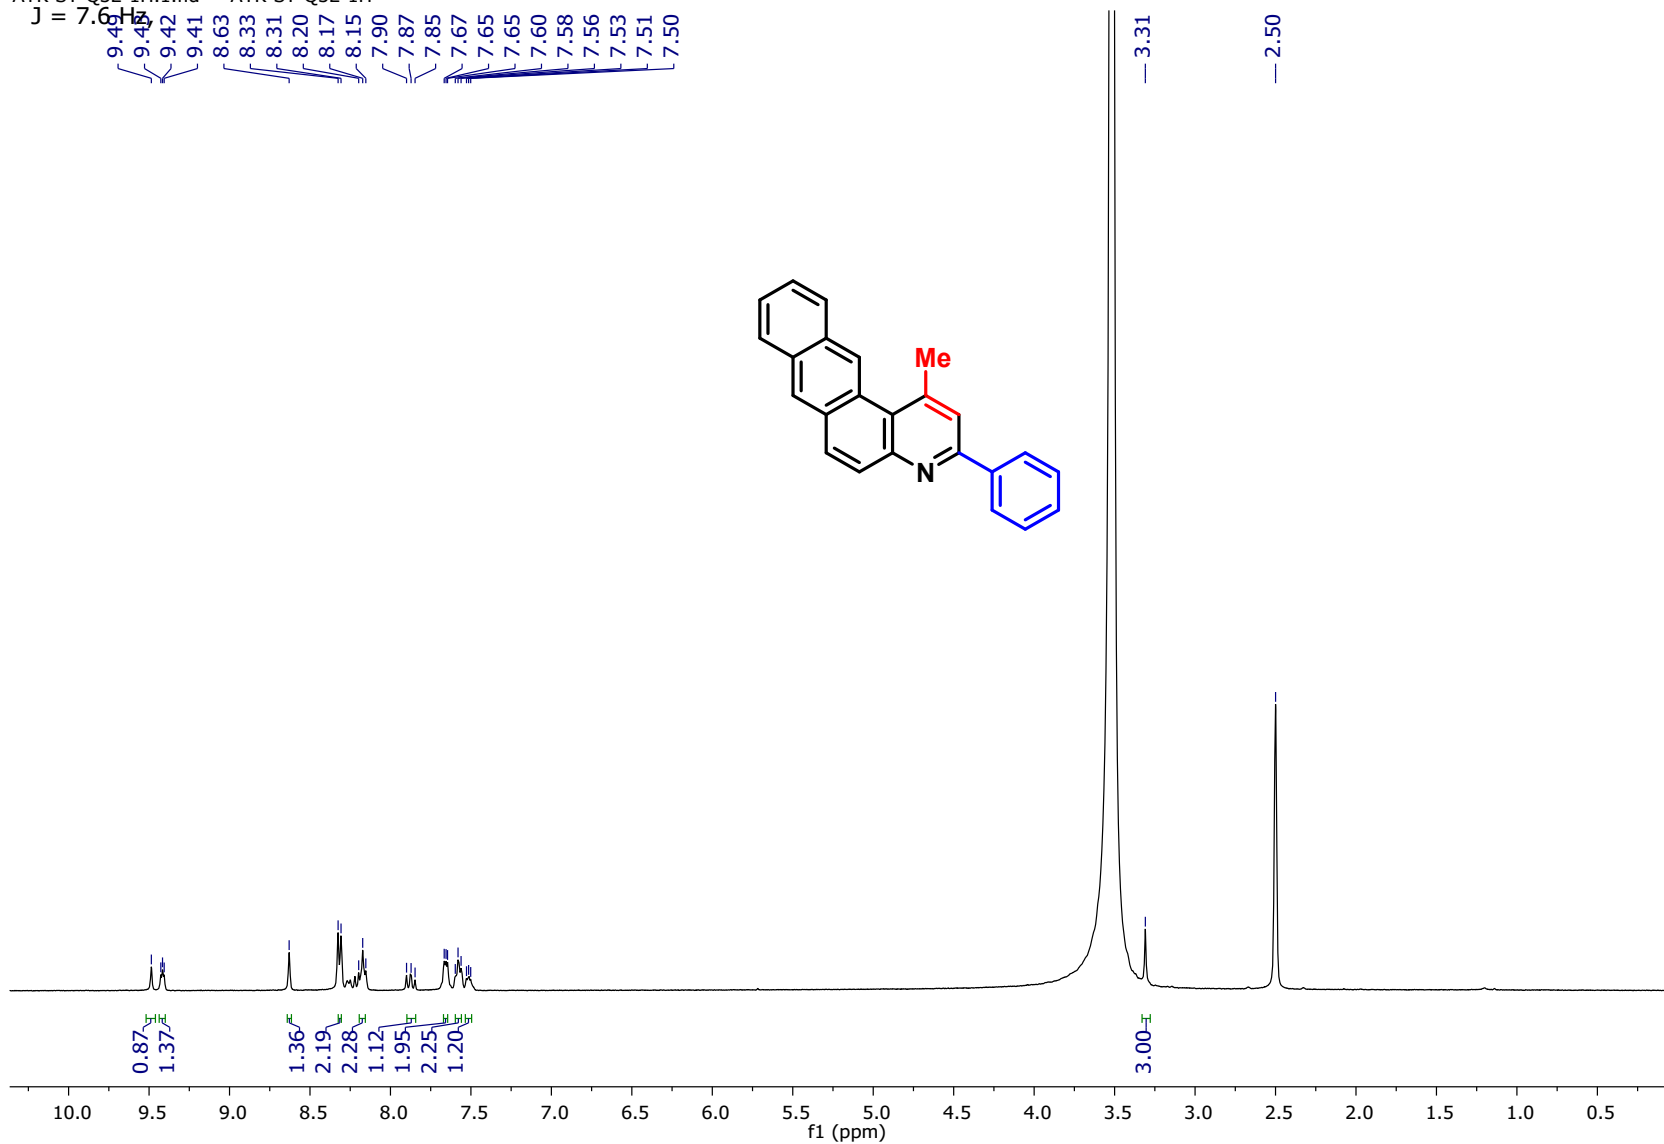

$^{13}\text{C}\{^1\text{H}\}$  NMR (125 MHz,  $\text{DMSO-}d_6$ ) spectrum of compound 3s

ATK-SY-Q32-13C.1.fid — ATK-SY-Q32-13C

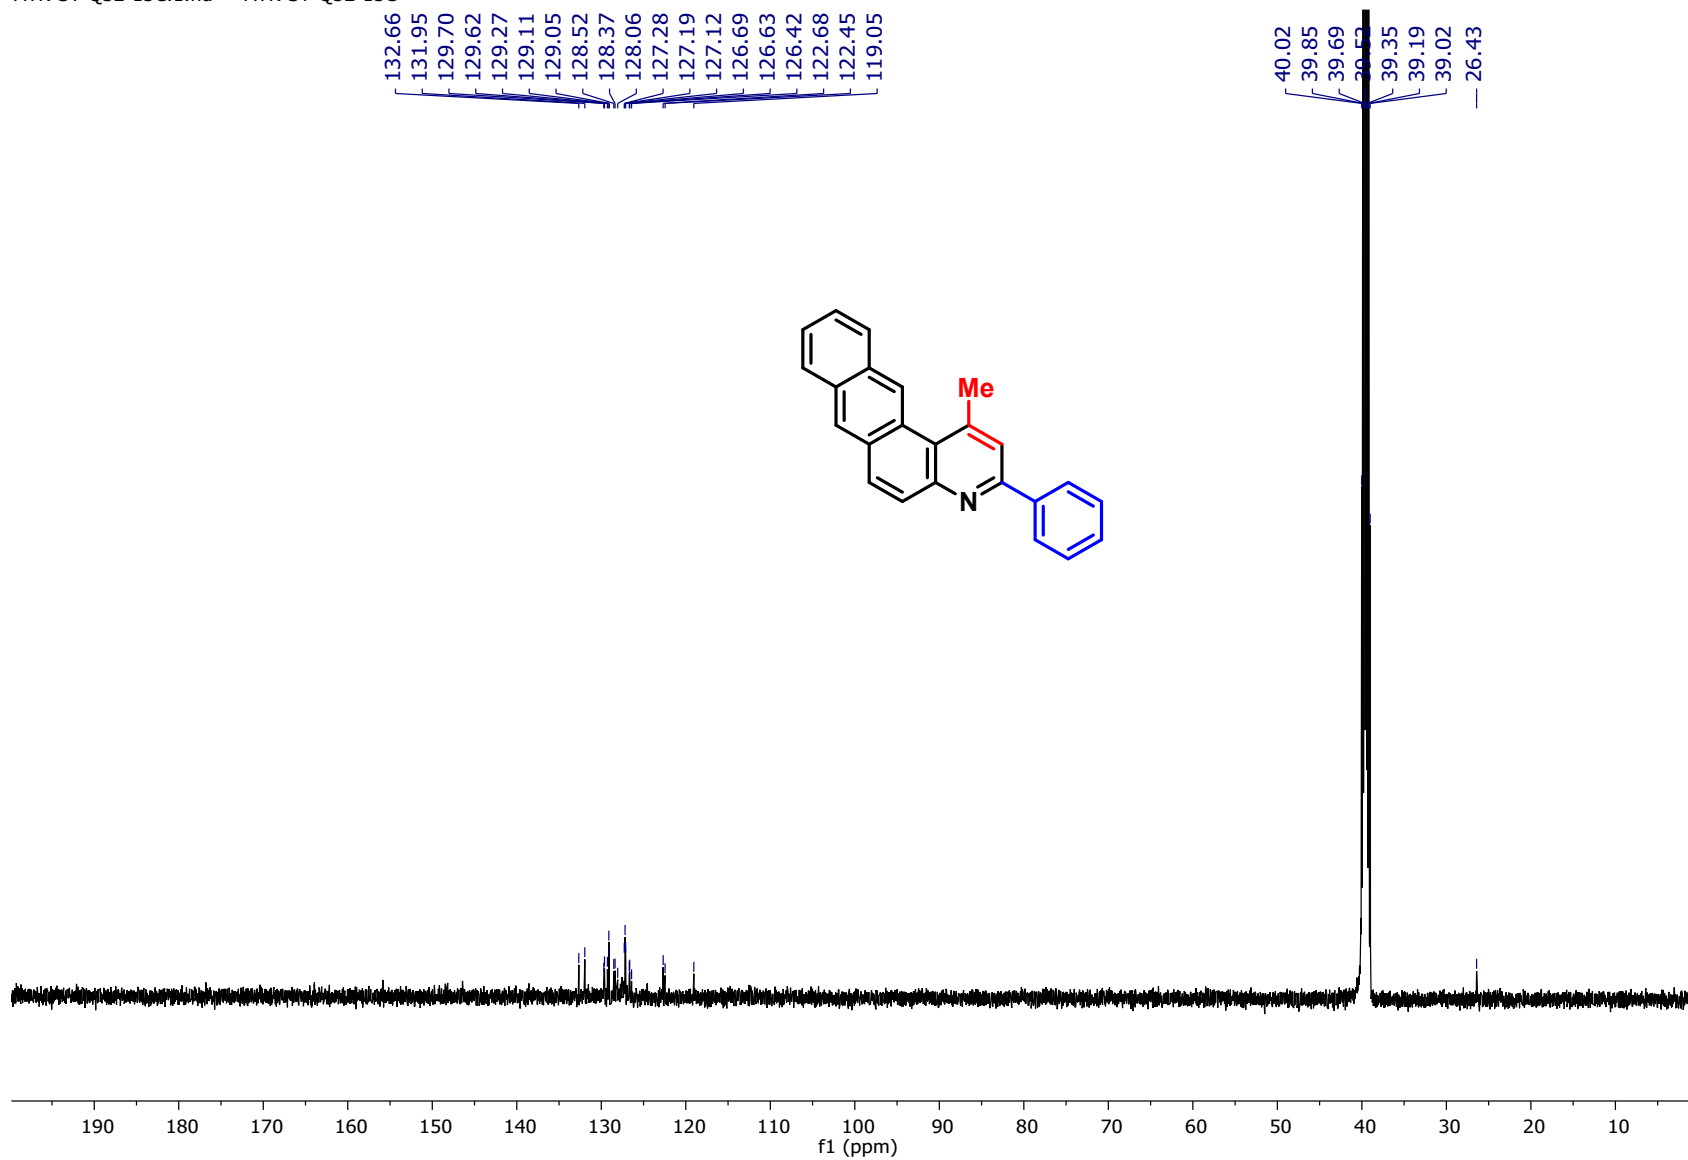

## HRMS spectrum of compound 3s

Sample Name  
User Name  
Sample Type  
ACQ Method

Sample13  
SYSTEM (SYSTEM)  
Sample  
DIRECT MASS\_POSITIVE\_01\_1.m

Position  
Inj Vol  
IRM Calibration Status  
Comment

P1-B1  
5  
Success

Instrument Name  
InjPosition  
Data Filename  
Acquired Time

QTOF  
5Y-Q32.d  
27-Jul-23 10:36:30 AM (UTC+05:30)

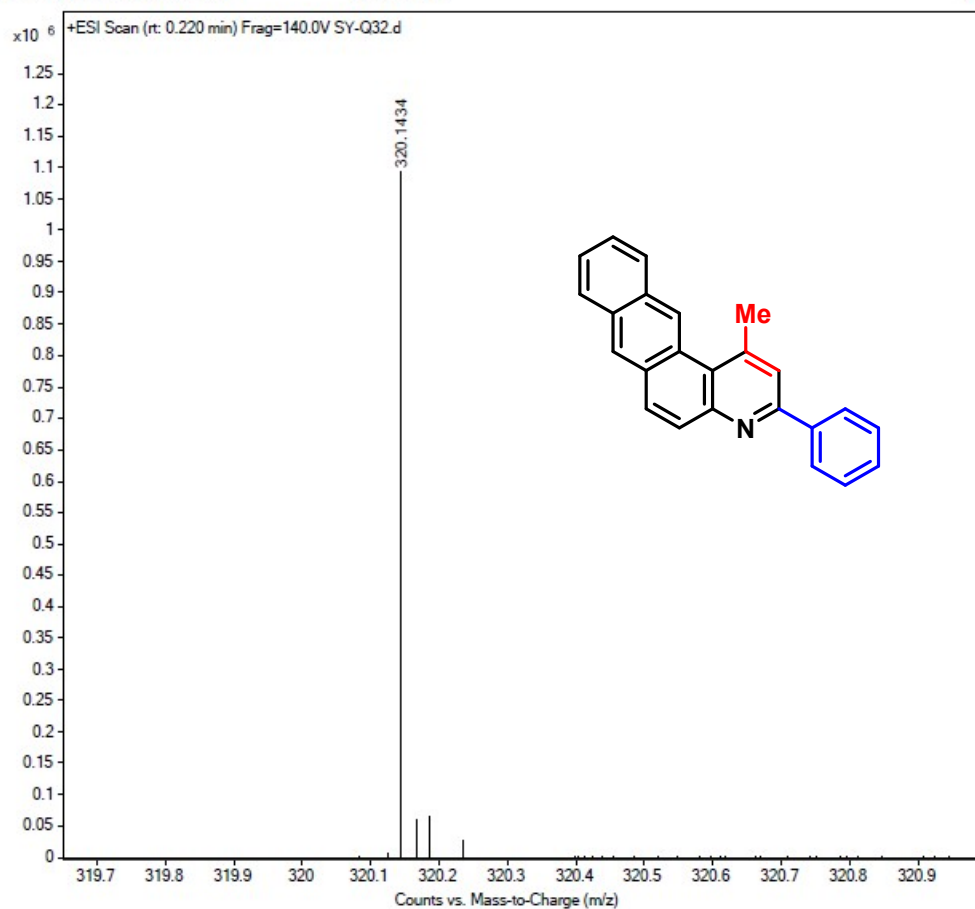



# <sup>1</sup>H NMR (500 MHz, CDCl<sub>3</sub>) spectrum of compound 3t

ATK-SY-Q42-1H.3.fid — ATK-SY-Q42-1H

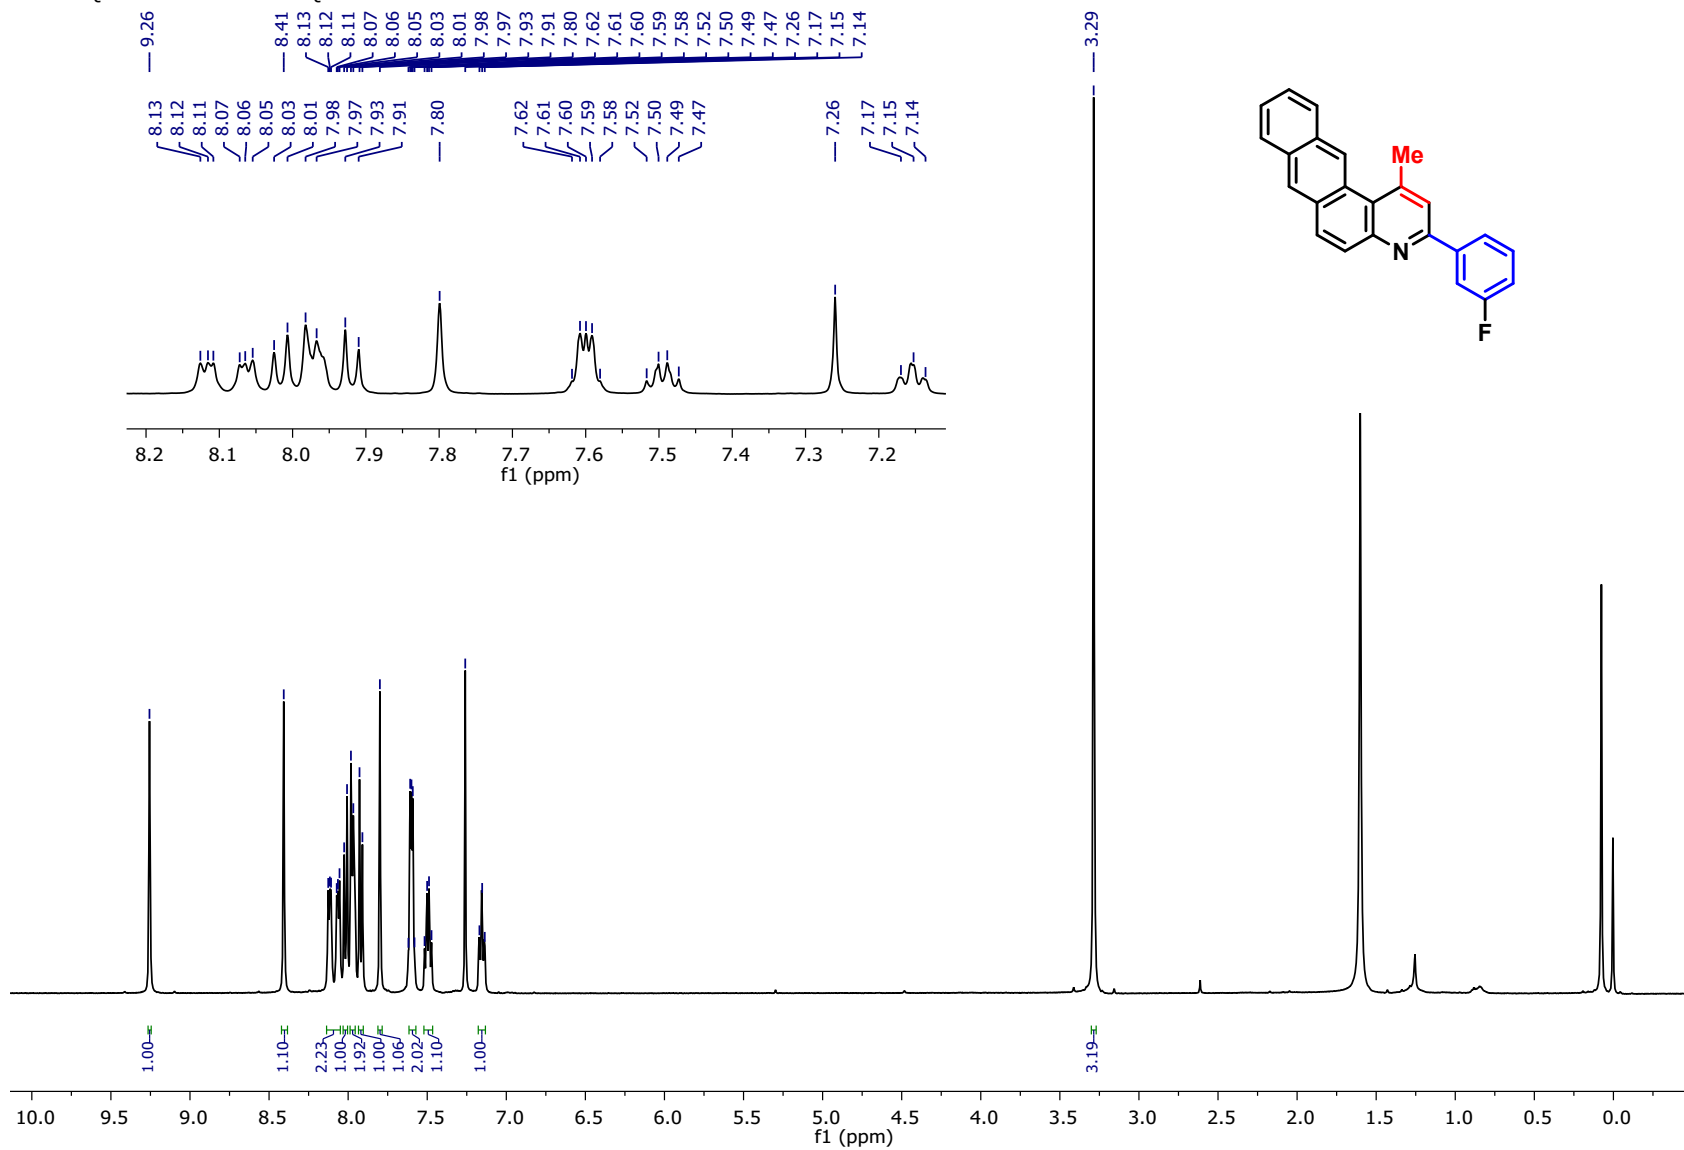

$^{13}\text{C}\{^1\text{H}\}$  NMR (125 MHz,  $\text{CDCl}_3$ ) spectrum of compound 3t

ATK-SY-Q42-13C.1.fid — ATK-SY-Q42-13C

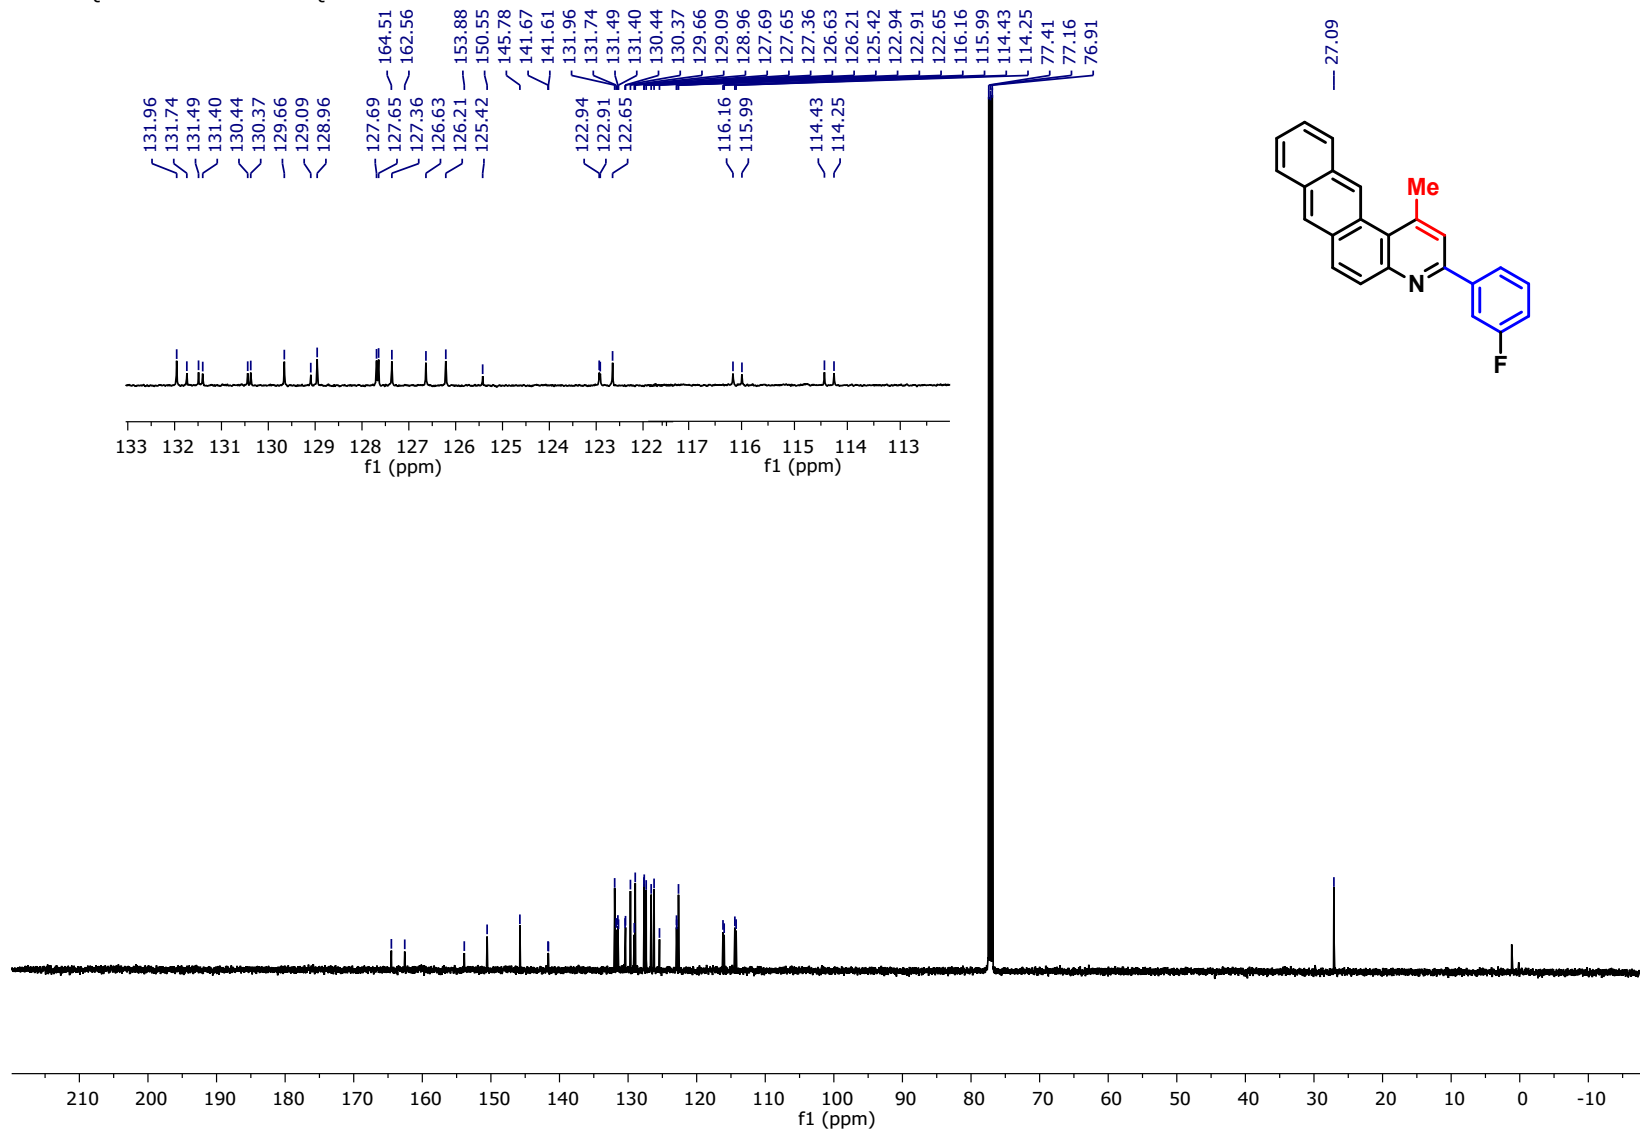

**$^{19}\text{F}$  NMR (471 MHz,  $\text{CDCl}_3$ ) spectrum of compound 3t**

SY-Q42-19F.2.fid — SY-Q42-19F

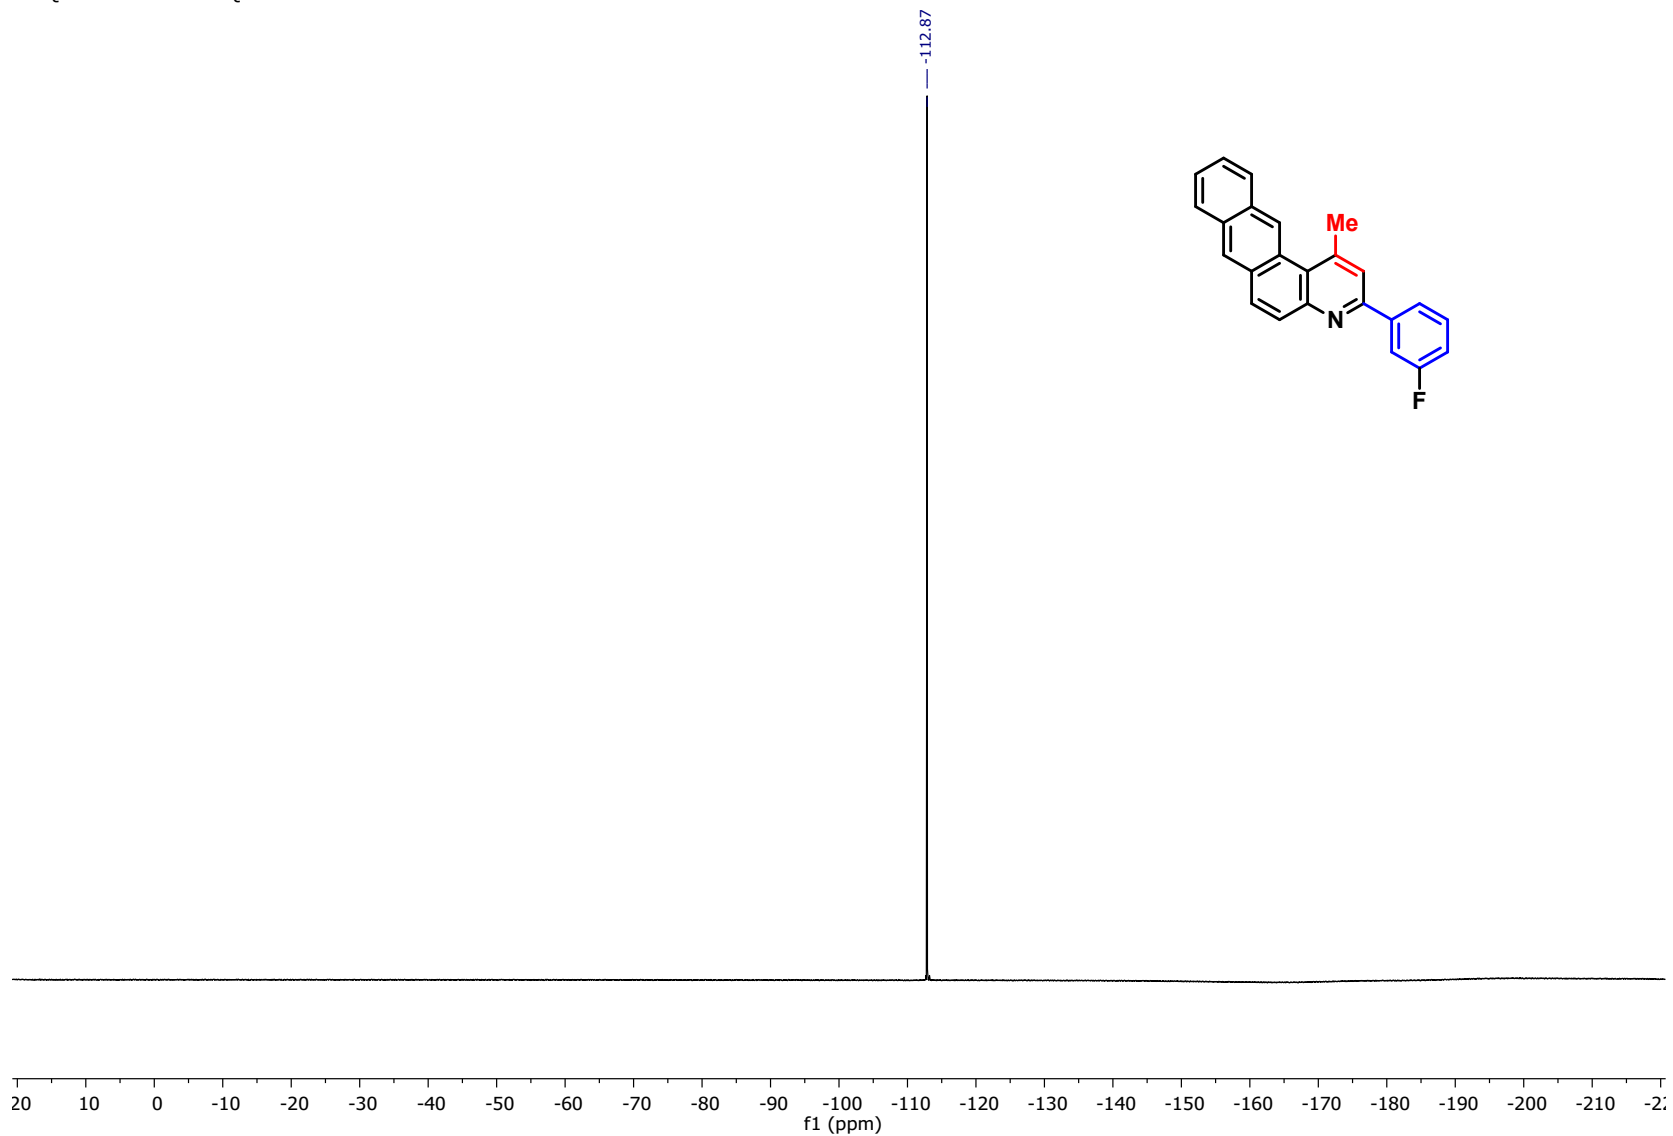

## HRMS spectrum of compound 3t

|             |                                 |                        |         |                 |                                   |
|-------------|---------------------------------|------------------------|---------|-----------------|-----------------------------------|
| Sample Name | Sample25                        | Position               | P1-C3   | Instrument Name | QTOF                              |
| User Name   | SYSTEM (SYSTEM)                 | Inj Vol                | 5       | InjPosition     |                                   |
| Sample Type | Sample                          | IRM Calibration Status | Success | Data Filename   | BS.SYQ42.d                        |
| ACQ Method  | DIRECT MASS_POSITIVE_100_1500.m | Comment                |         | Acquired Time   | 16-Jun-23 10:38:22 AM (UTC+05:30) |

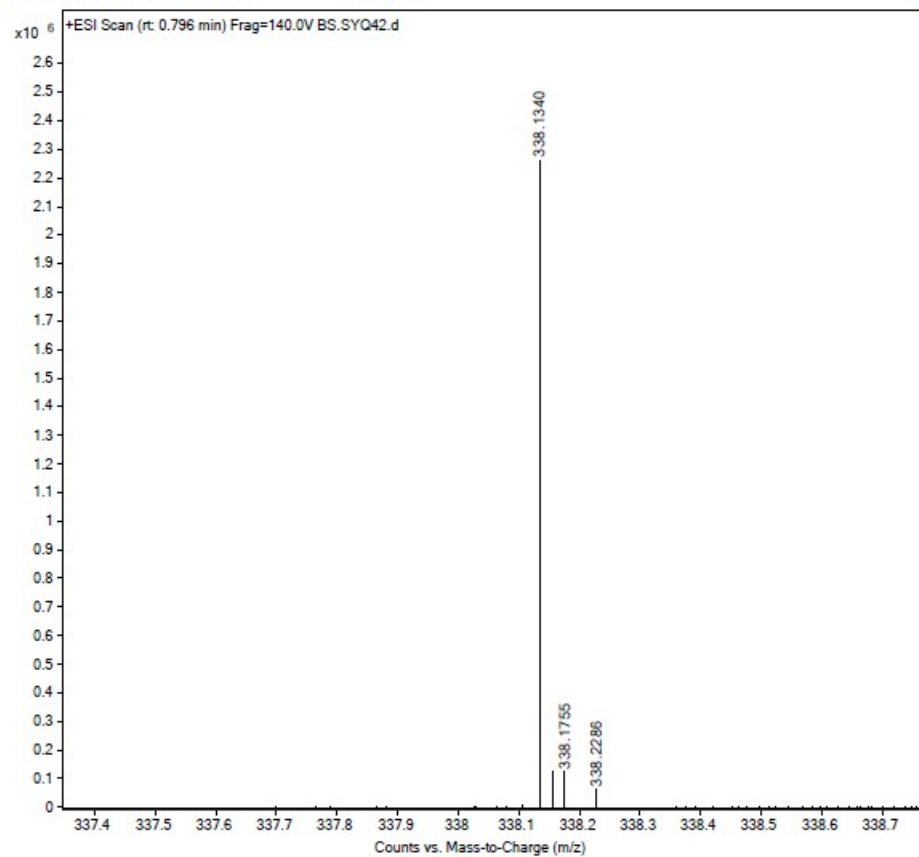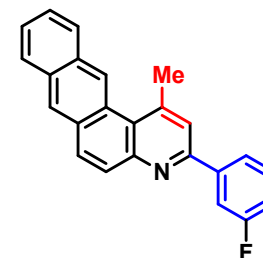

# <sup>1</sup>H NMR (400 MHz, CDCl<sub>3</sub>) spectrum of compound 3u

ATK-SY-Q46-1H.1.fid — ATK-SY-Q46-1H

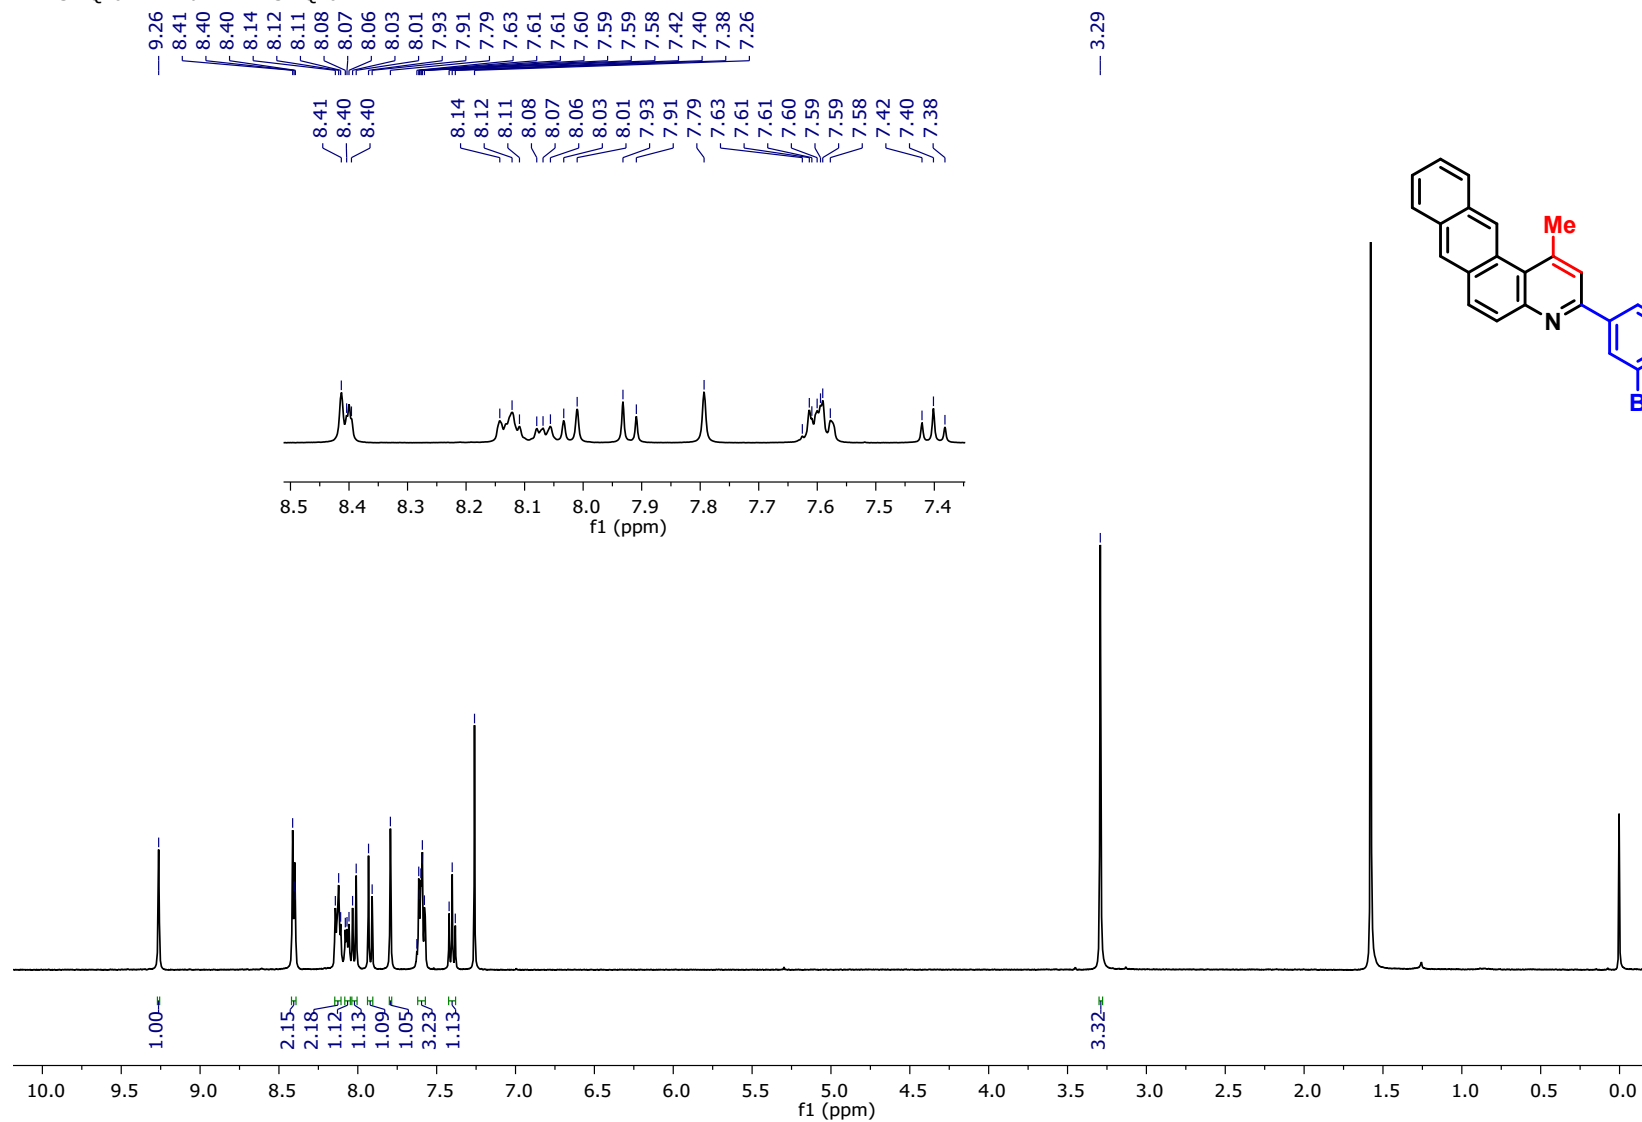

**$^{13}\text{C}\{^1\text{H}\}$  NMR (125 MHz,  $\text{CDCl}_3$ ) spectrum of compound 3u**

ATK-SY-Q46-13C.1.fid — ATK-SY-Q46-13C

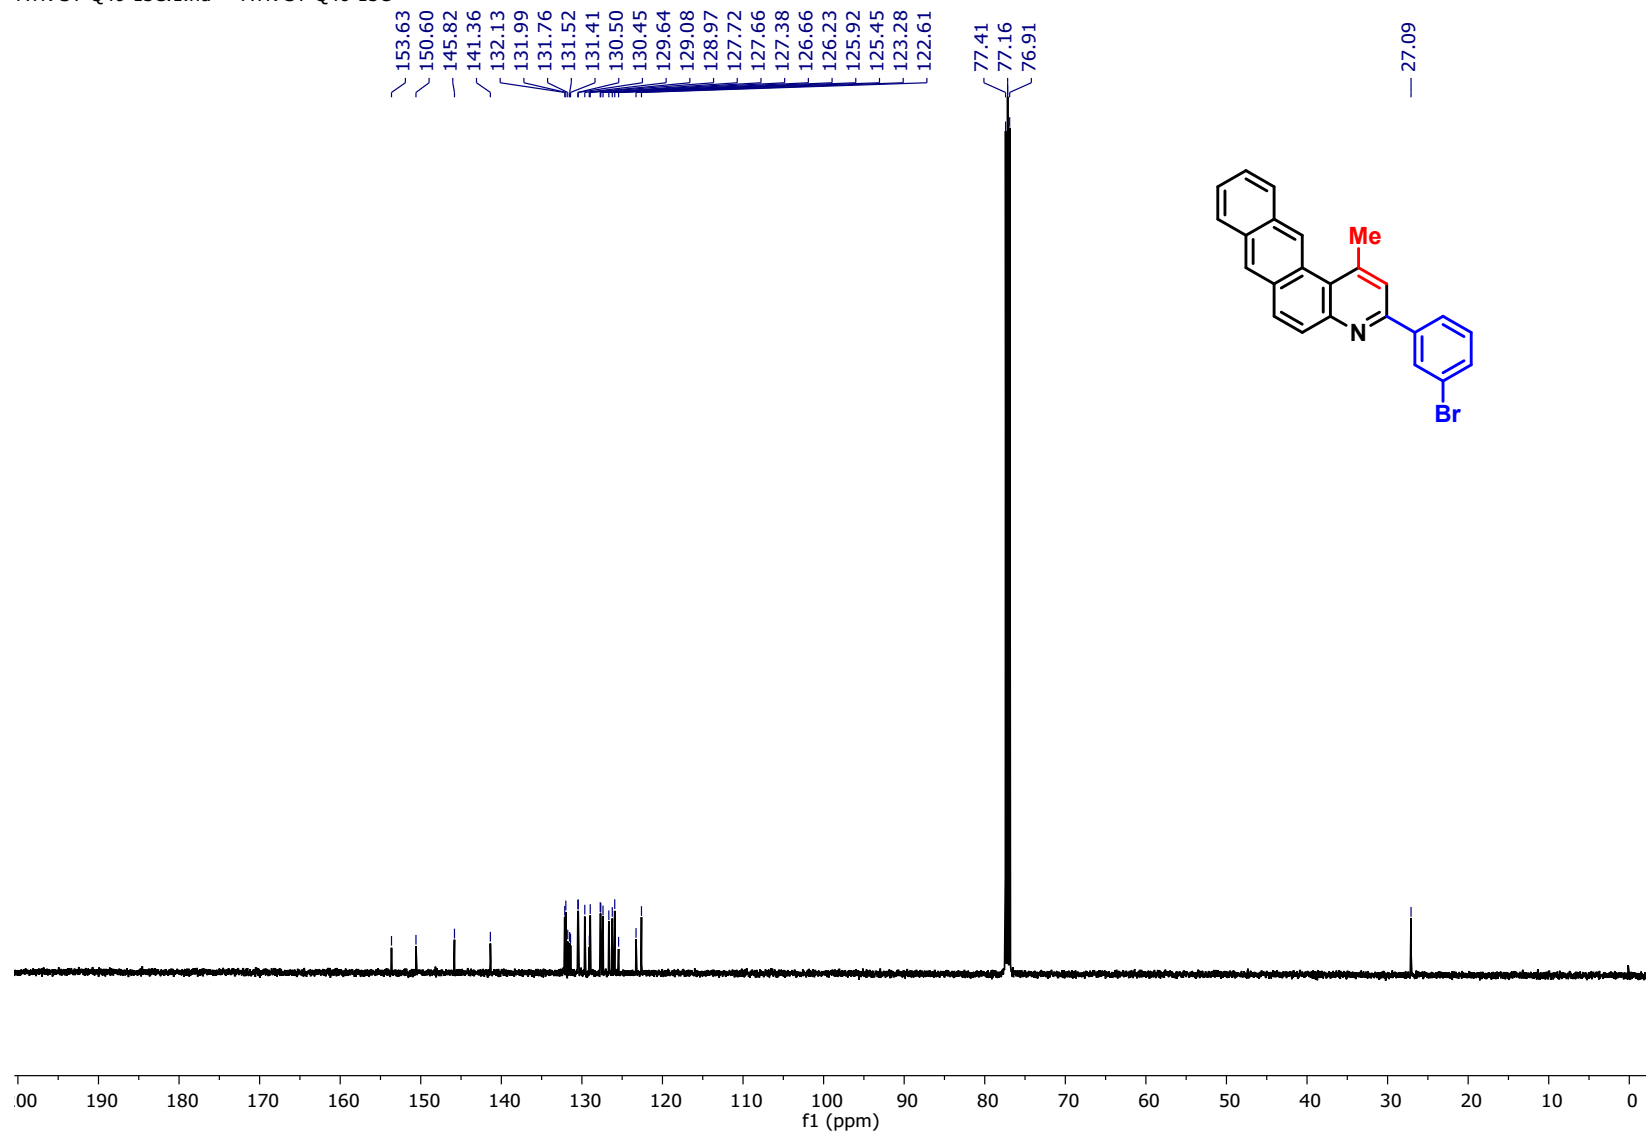

## HRMS spectrum of compound 3u

Sample Name  
User Name  
Sample Type  
ACQ Method

Sample22  
SYSTEM (SYSTEM)  
Sample  
DIRECT MASS\_POSITIVE\_01\_1.m  
Position  
Inj Vol  
IRM Calibration Status  
Comment  
P1-B11  
5  
Success

Instrument Name  
InjPosition  
Data Filename  
Acquired Time  
QTOF  
5  
SY-Q46.d  
13-Jul-23 11:4

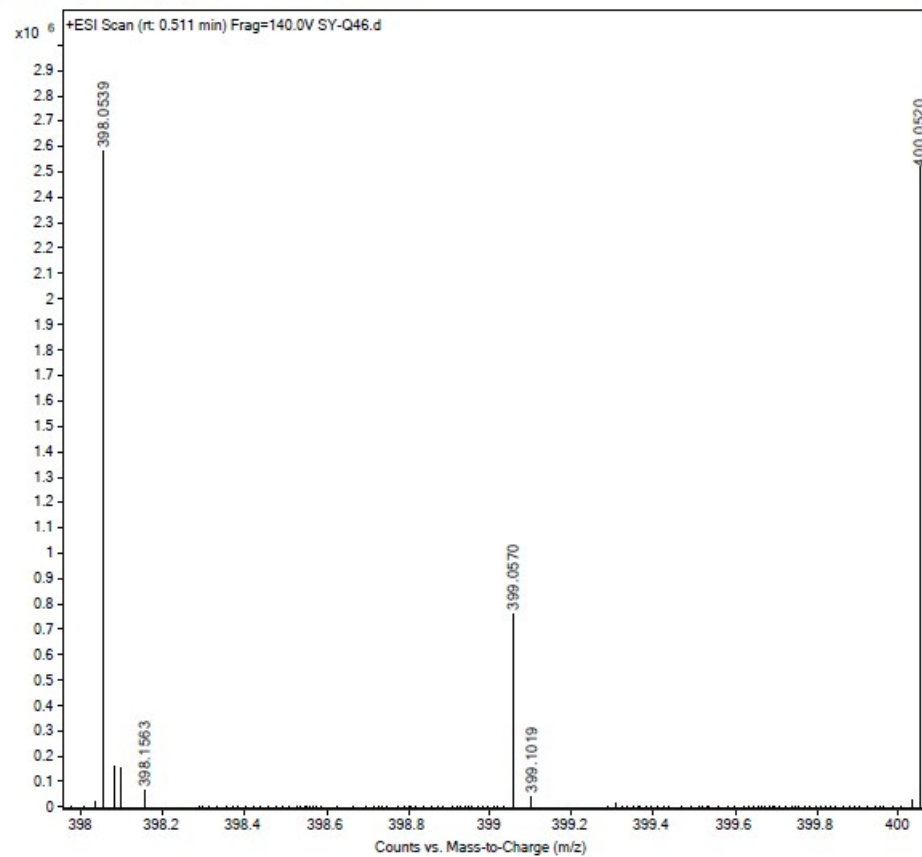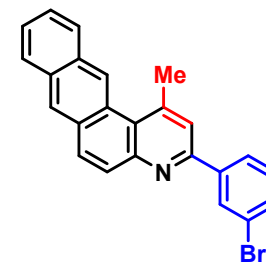

**<sup>1</sup>H NMR (500 MHz, CDCl<sub>3</sub>) spectrum of compound 3v**

ATK-SY-Q36-1H.1.fid — ATK-SY-Q36-1H

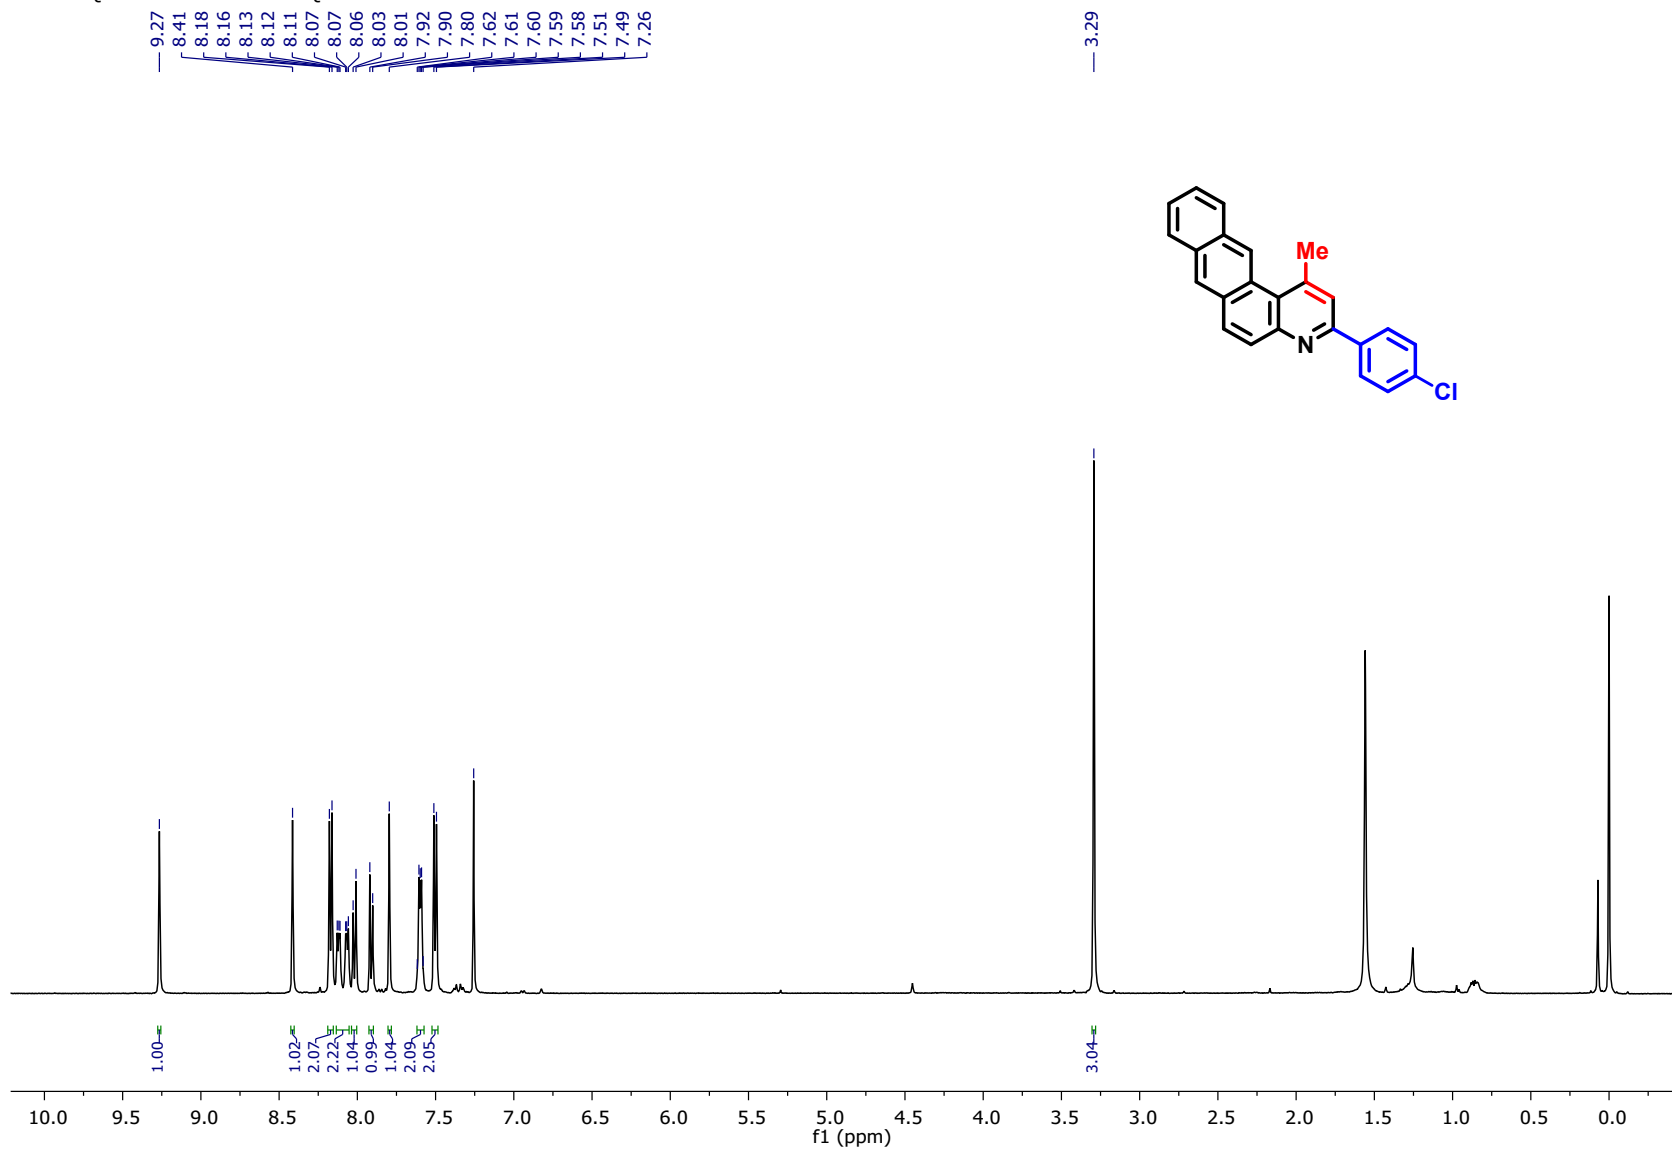



$^{13}\text{C}\{^1\text{H}\}$  NMR (125 MHz,  $\text{CDCl}_3$ ) spectrum of compound 3v

ATK-SY-Q36-13C.3.fid — ATK-SY-Q36-13C

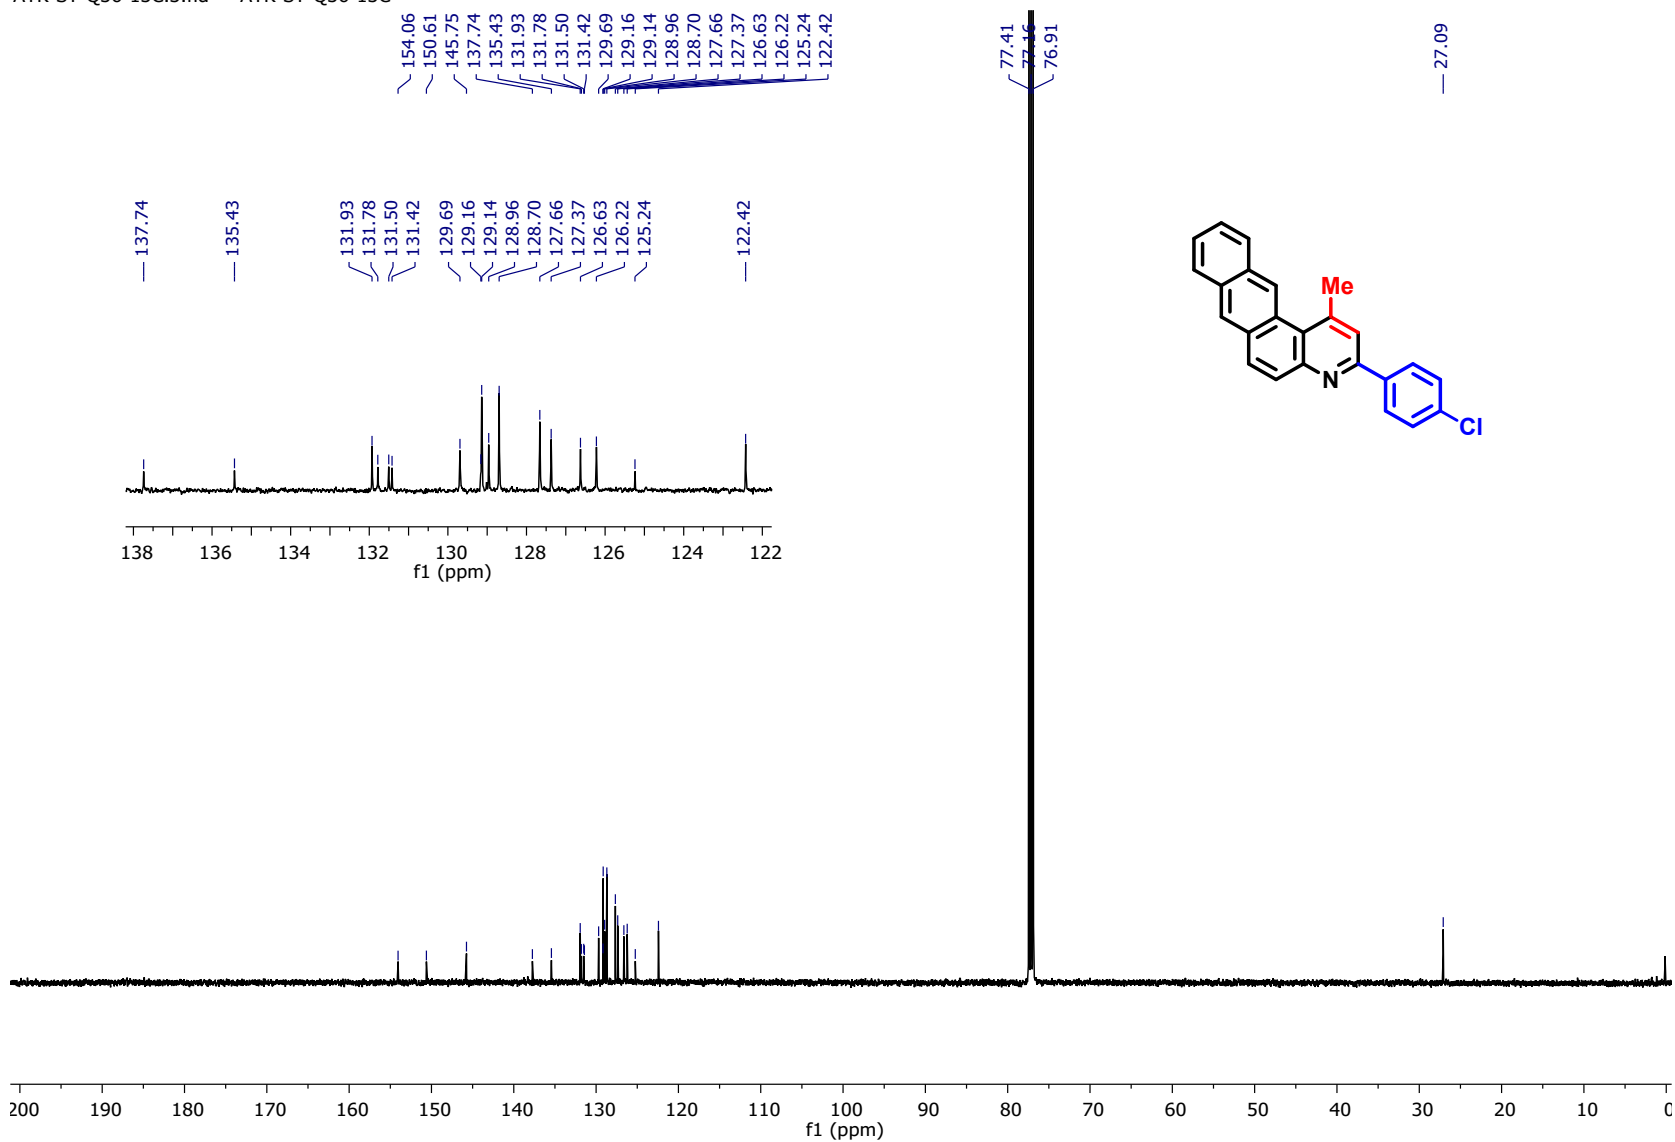

## HRMS spectrum of compound 3v

|                                 |                        |         |                 |             |
|---------------------------------|------------------------|---------|-----------------|-------------|
| Sample14                        | Position               | P1-B3   | Instrument Name | QTOF        |
| SYSTEM (SYSTEM)                 | Inj Vol                | 5       | InjPosition     |             |
| Sample                          | IRM Calibration Status | Success | Data Filename   | SY-Q36.d    |
| DIRECT MASS_POSITIVE_100_1500.m | Comment                |         | Acquired Time   | 05-Sep-23 1 |

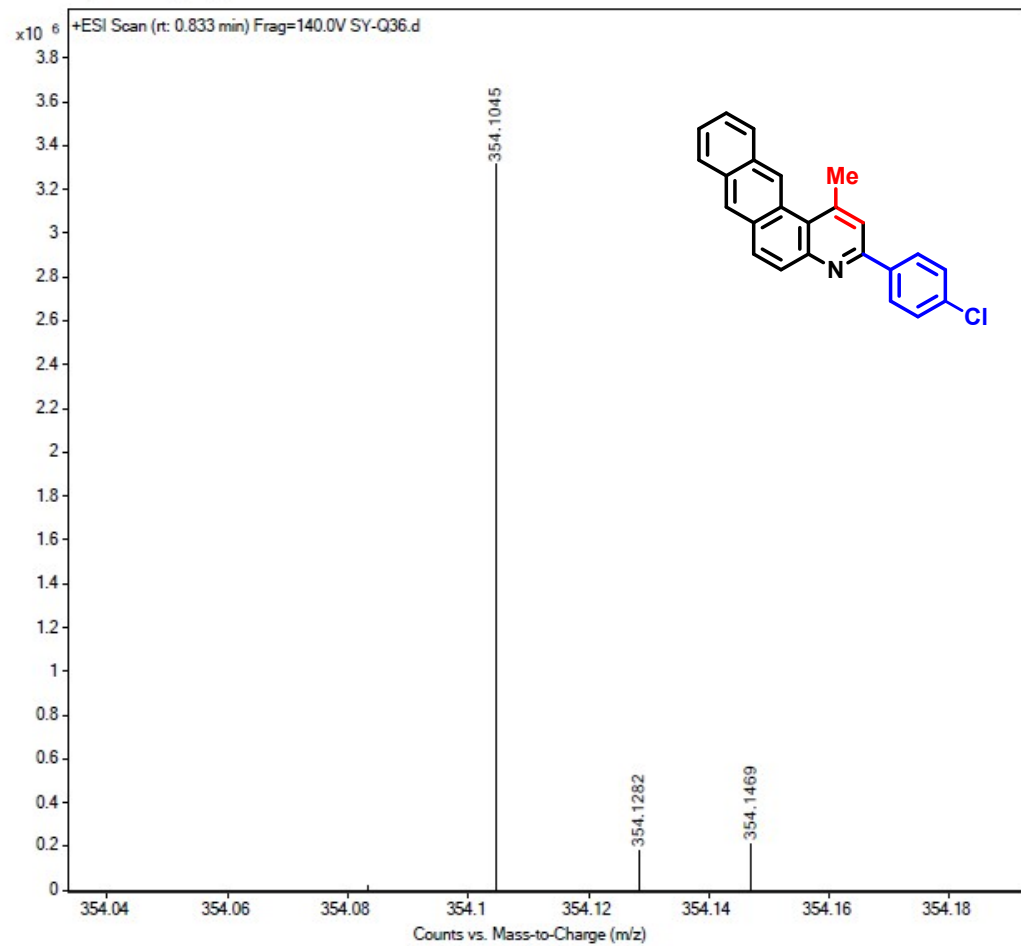

# <sup>1</sup>H NMR (500 MHz, CDCl<sub>3</sub>) spectrum of compound 3w

ATK-SY-Q45-13C.5.fid — ATK-SY-Q45-1H

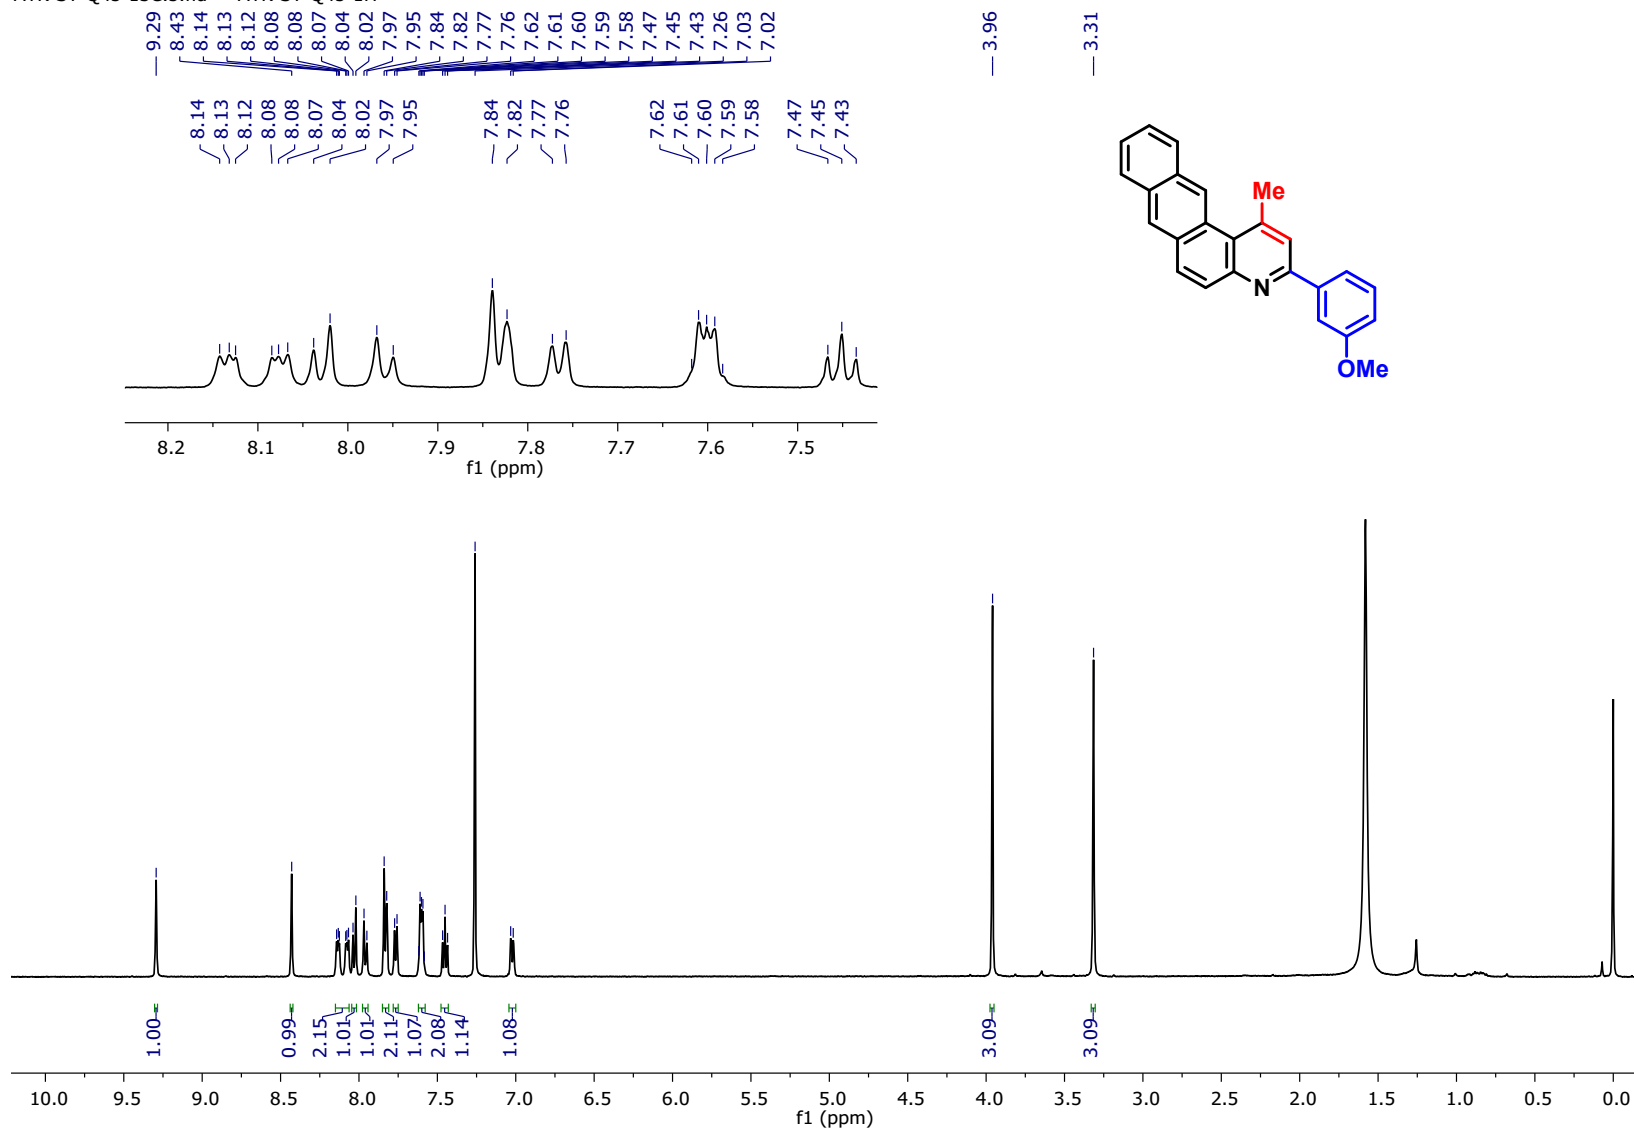

$^{13}\text{C}\{^1\text{H}\}$  NMR (125 MHz,  $\text{CDCl}_3$ ) spectrum of compound 3w

ATK-SY-Q45-13C.1.fid — ATK-SY-Q45-13C

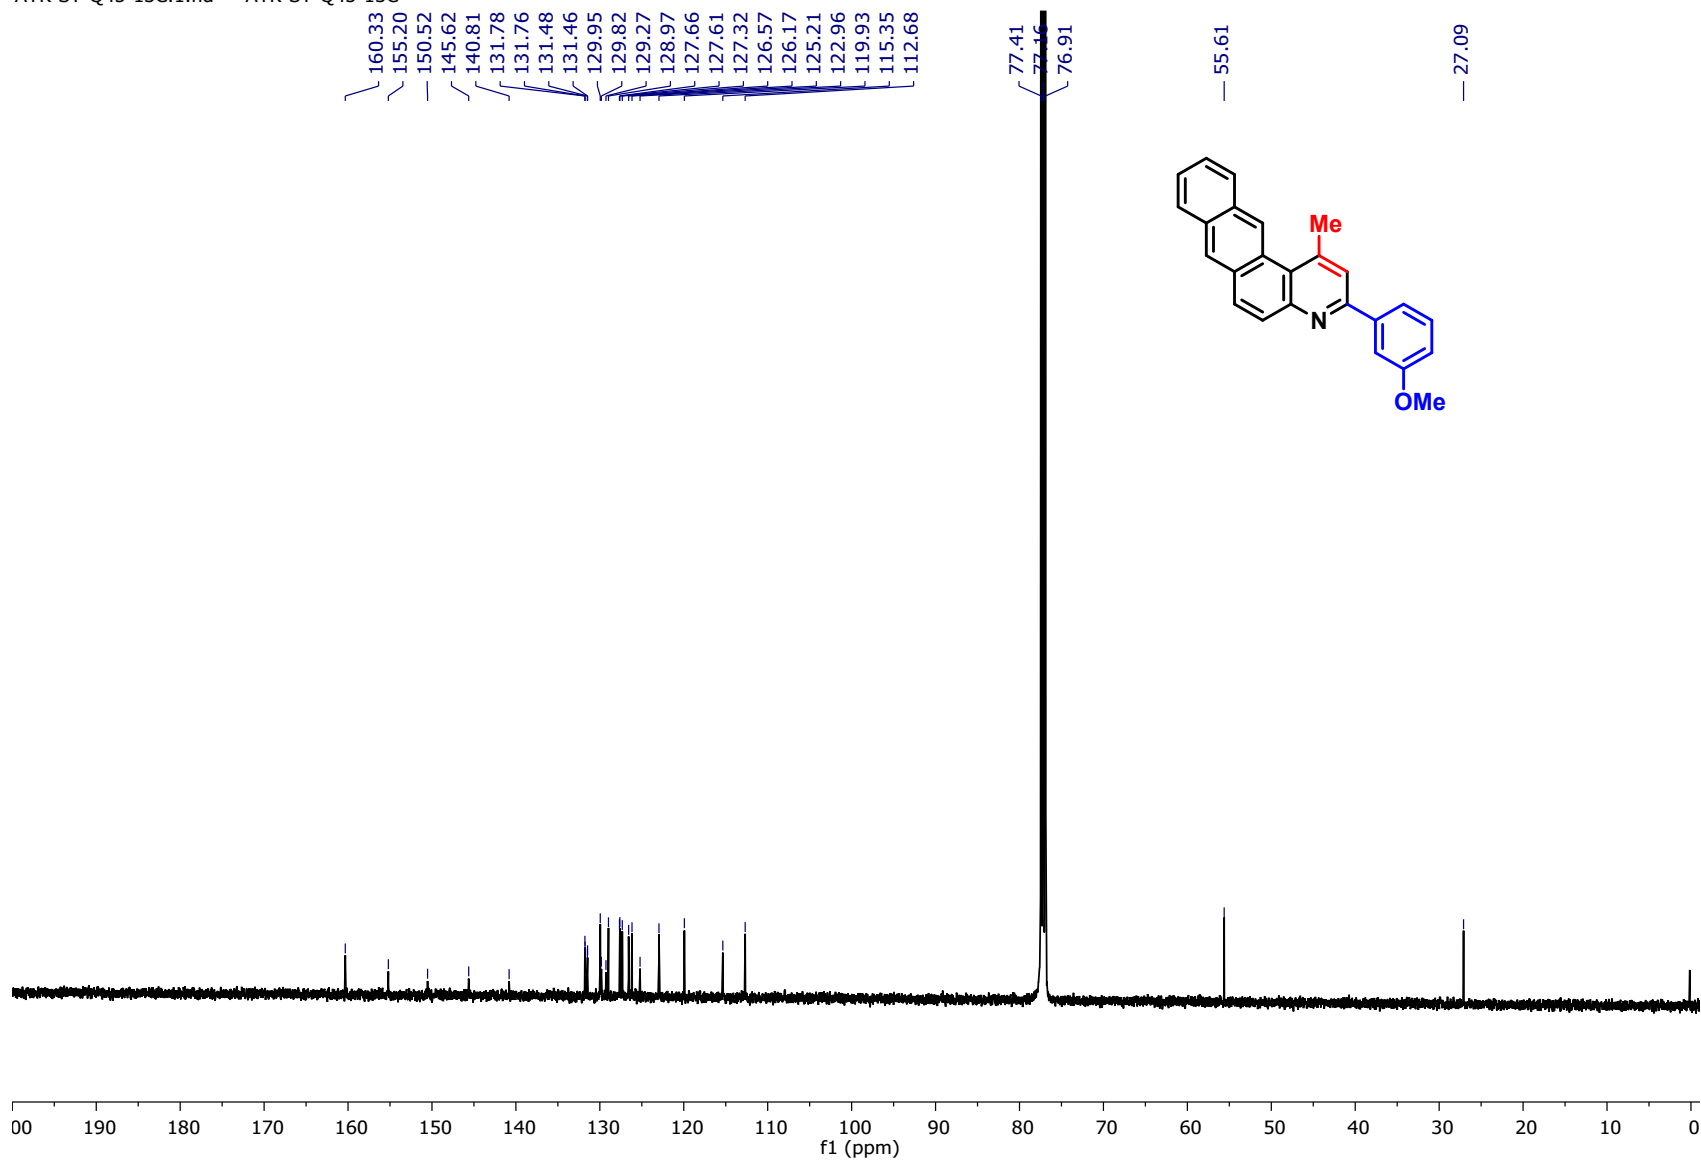

## HRMS spectrum of compound 3w

|             |                             |                        |         |                 |                                   |
|-------------|-----------------------------|------------------------|---------|-----------------|-----------------------------------|
| Sample Name | Sample24                    | Position               | P1-C2   | Instrument Name | QTOF                              |
| User Name   | SYSTEM (SYSTEM)             | Inj Vol                | 5       | InjPosition     |                                   |
| Sample Type | Sample                      | IRM Calibration Status | Success | Data Filename   | SY-Q45.d                          |
| ACQ Method  | DIRECT MASS_POSITIVE_01_1.m | Comment                |         | Acquired Time   | 13-Jul-23 11:45:29 AM (UTC+05:30) |

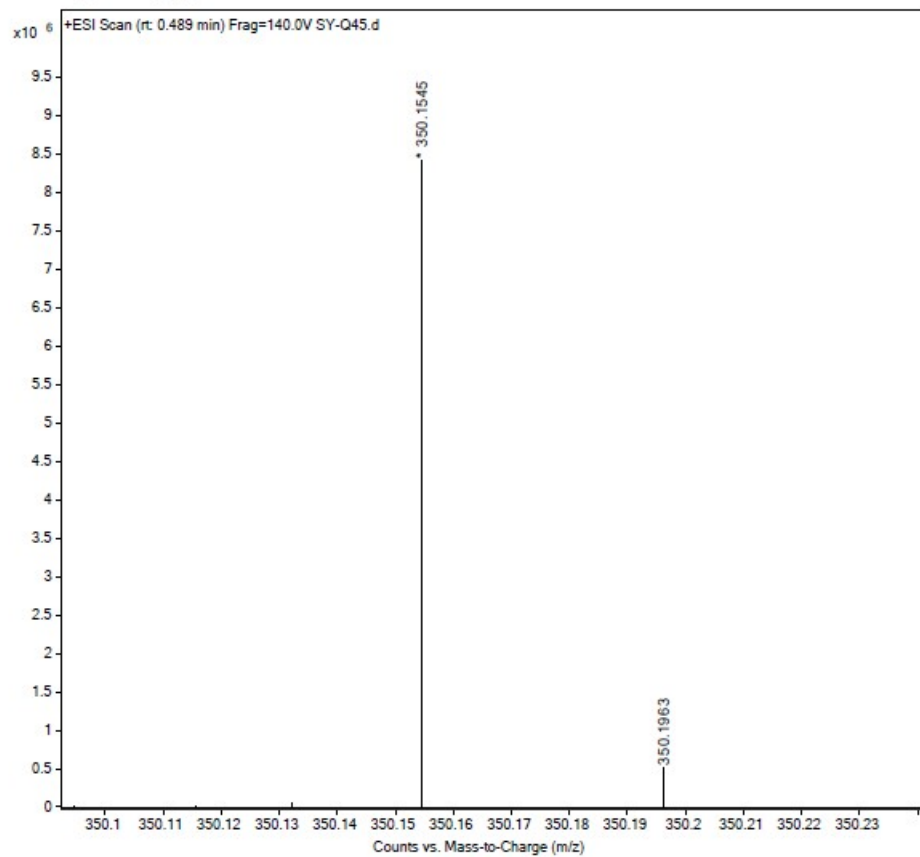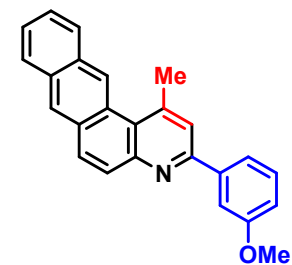

**<sup>1</sup>H NMR (400 MHz, DMSO-*d*<sub>6</sub>) spectrum of compound 3x**

ATK-SY-Q30-1H.1.fid — ATK-SY-Q30-1H

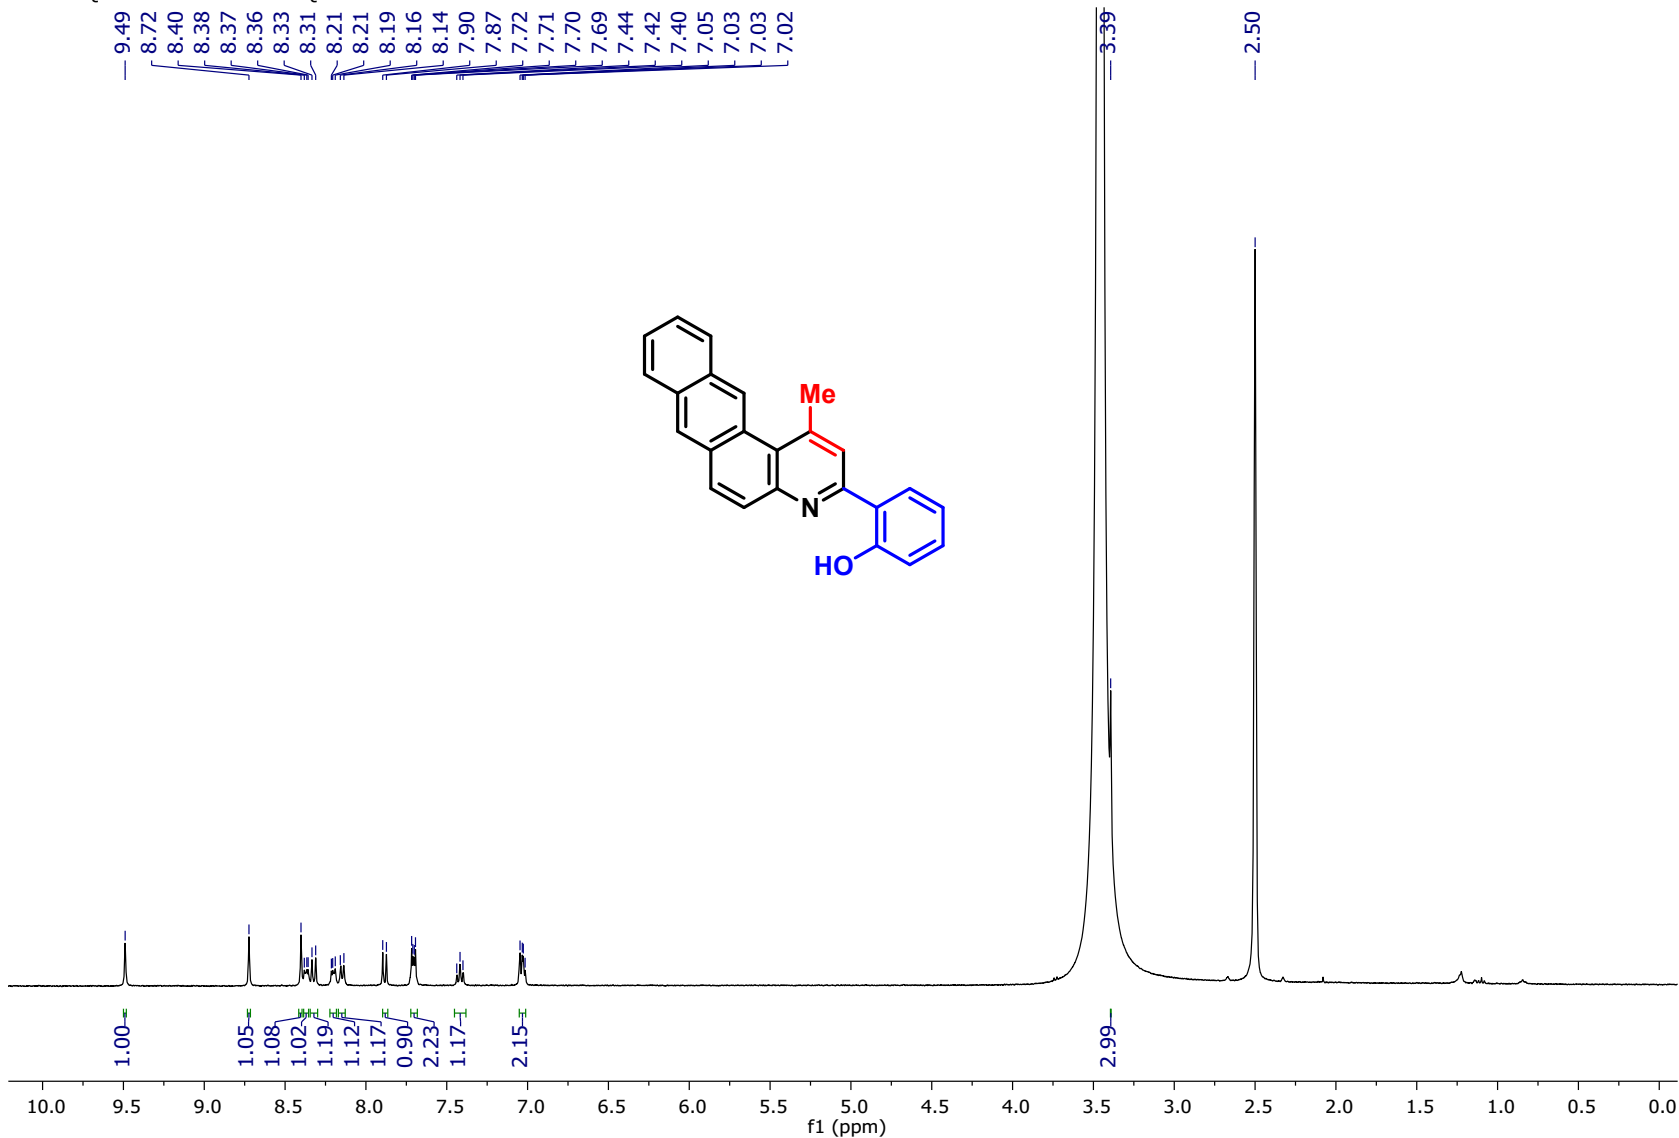

# $^{13}\text{C}\{^1\text{H}\}$ NMR (125 MHz, $\text{DMSO-}d_6$ ) spectrum of compound 3x

ATK-SY-Q30-13C.3.fid — ATK-SY-Q30-13C

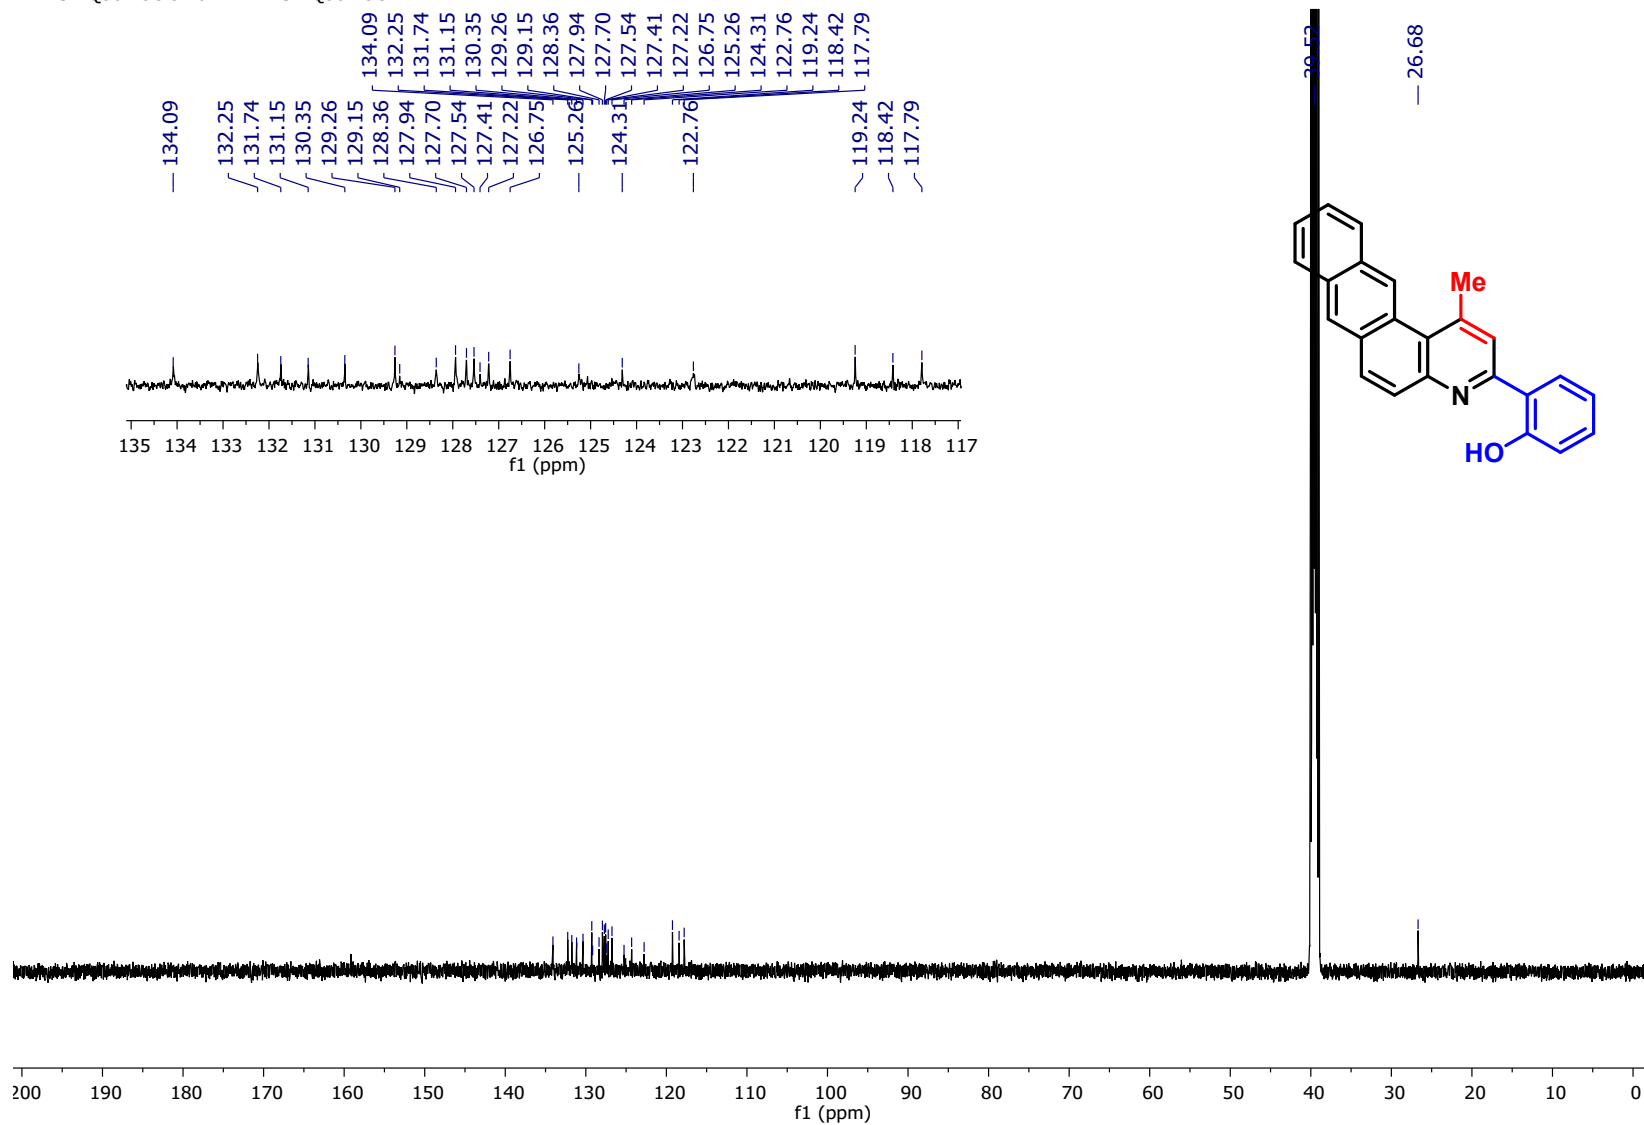

## HRMS spectrum of compound 3x

|             |                      |                        |         |                 |                                   |
|-------------|----------------------|------------------------|---------|-----------------|-----------------------------------|
| Sample Name | ATK_SY_Q30_POS       | Position               | P1-E5   | Instrument Name | Instrument 1                      |
| User Name   |                      | Inj Vol                | 10      | InjPosition     |                                   |
| Sample Type | Sample               | IRM Calibration Status | Success | Data Filename   | ATK_SY_Q30_POS_019.d              |
| ACQ Method  | FULL SCAN-POSITIVE.m | Comment                |         | Acquired Time   | 28-Feb-23 05:31:58 PM (UTC+05:30) |

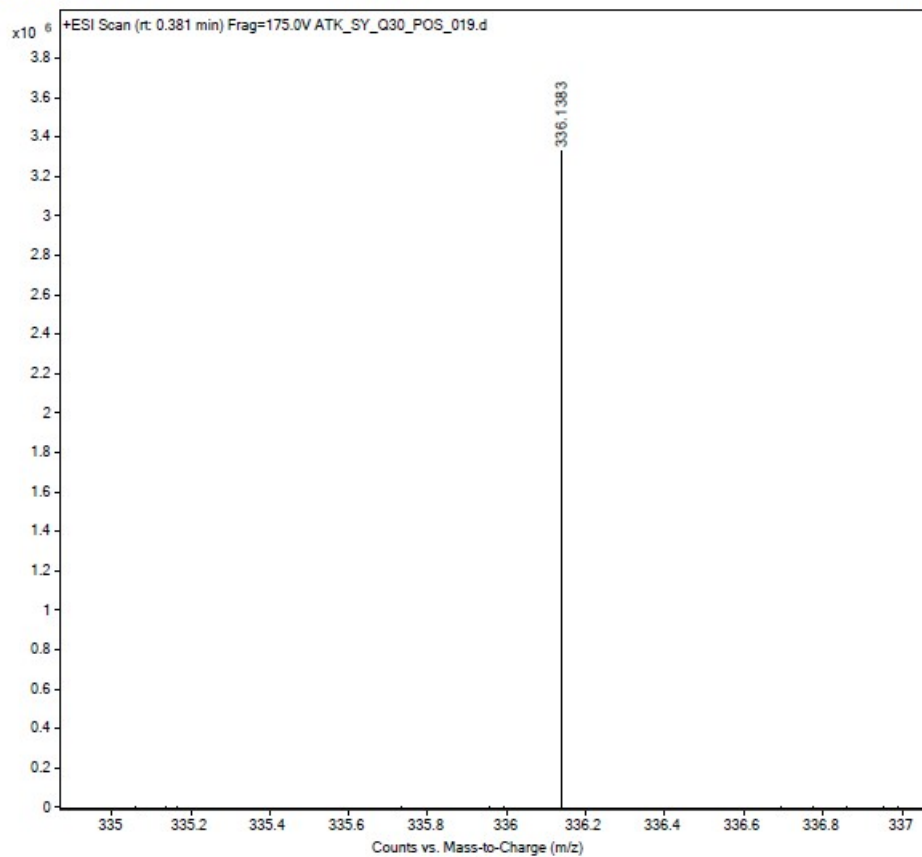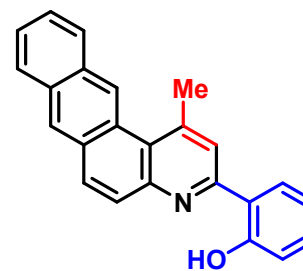



**<sup>1</sup>H NMR (500 MHz, CDCl<sub>3</sub>) spectrum of compound 4a**

SY-Q39-1H.3.fid — SY-Q39-1H

8.11  
8.09  
7.51  
7.50  
7.48  
7.45  
7.43  
7.26  
7.13  
6.49  
3.96  
3.92  
2.89

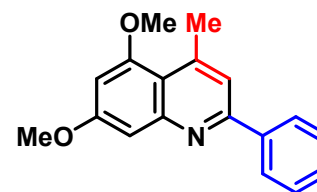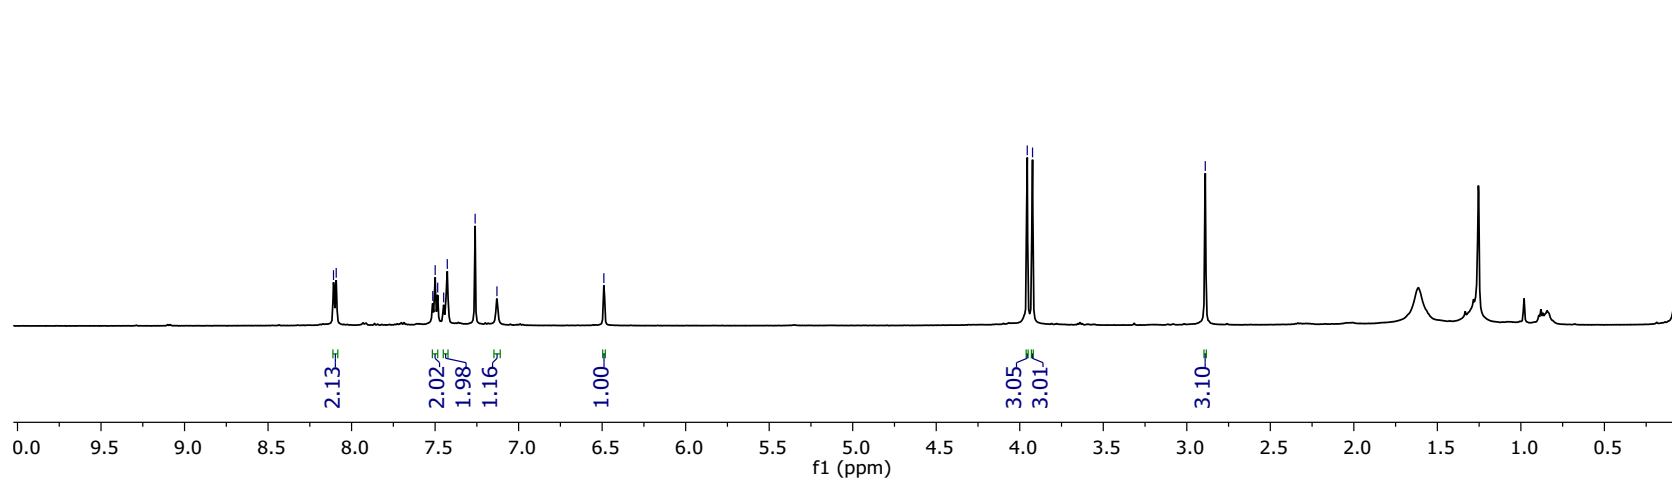

$^{13}\text{C}\{^1\text{H}\}$  NMR (125 MHz,  $\text{CDCl}_3$ ) spectrum of compound 4a

SY-Q39-13C.1.fid — SY-Q39-13C

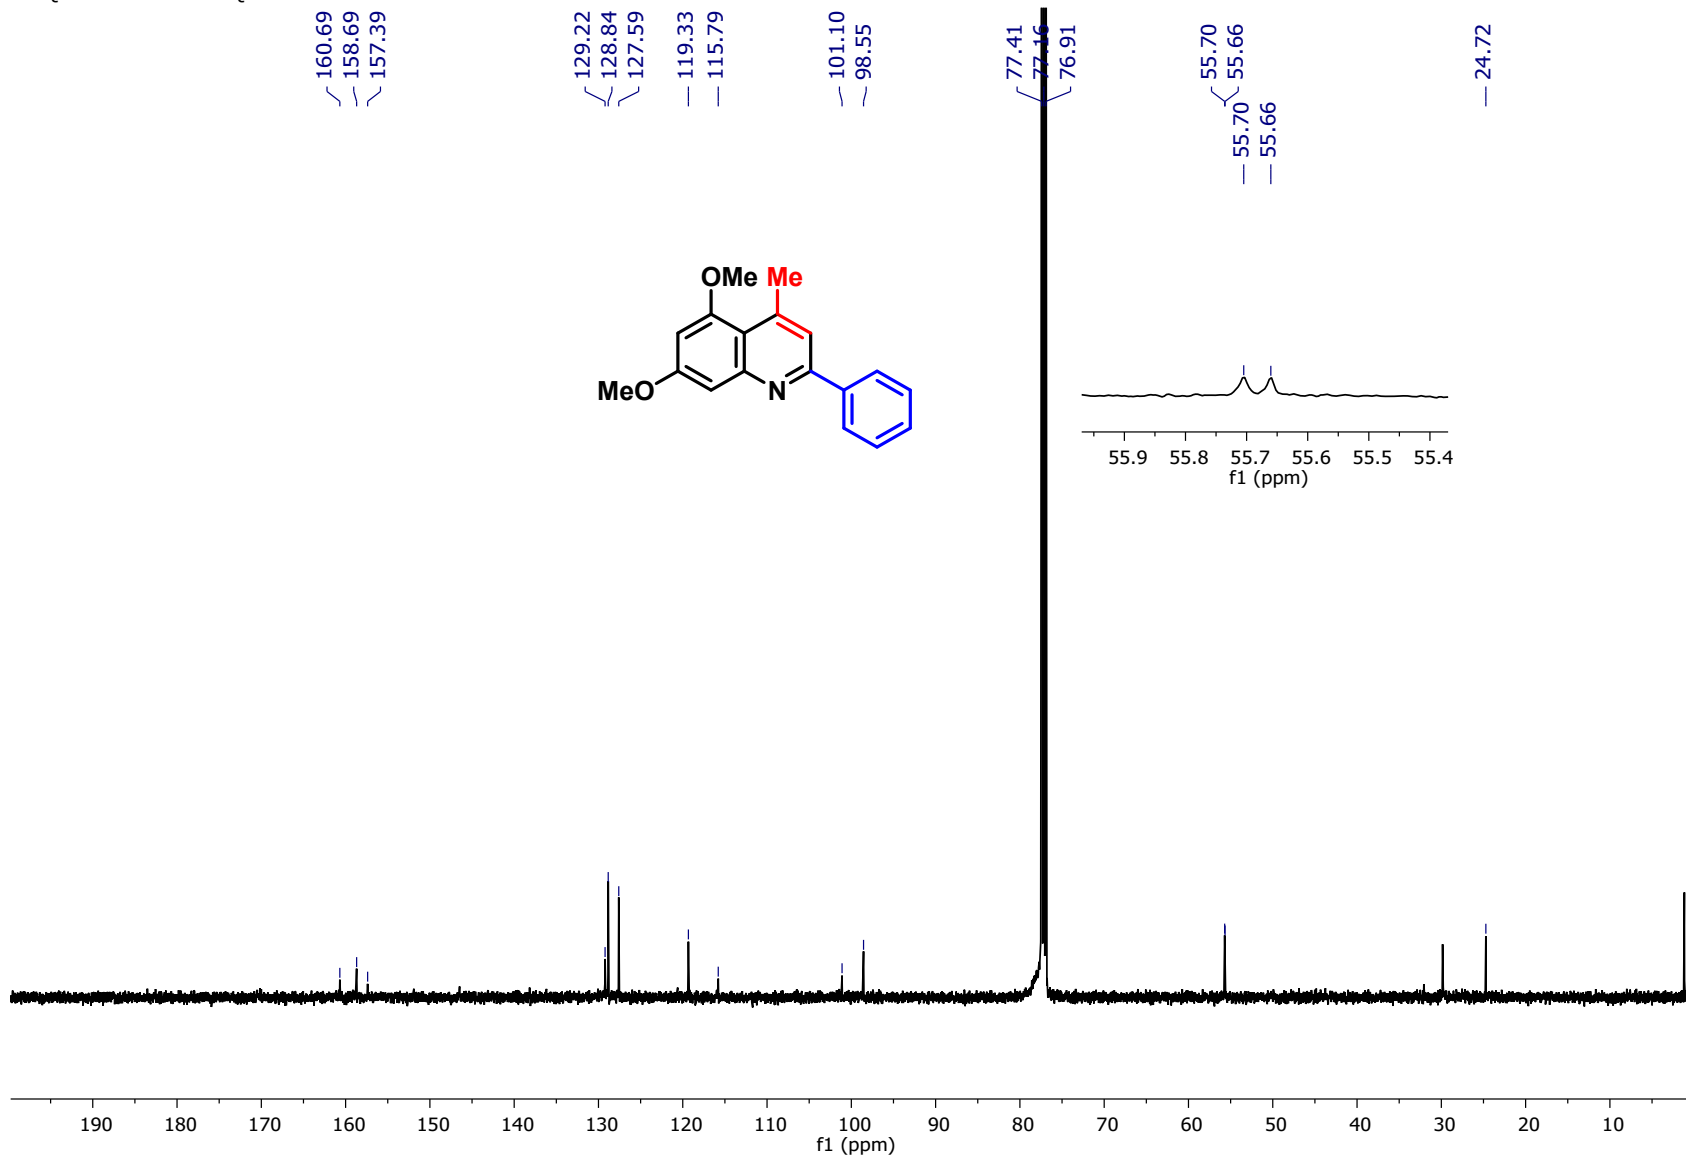

## HRMS spectrum of compound 4a

|             |                                 |                        |         |                 |                                   |
|-------------|---------------------------------|------------------------|---------|-----------------|-----------------------------------|
| Sample Name | Sample35                        | Position               | P1-C9   | Instrument Name | QTOF                              |
| User Name   | SYSTEM (SYSTEM)                 | Inj Vol                | 5       | InjPosition     |                                   |
| Sample Type | Sample                          | IRM Calibration Status | Success | Data Filename   | positive.SY-Q39.d                 |
| ACQ Method  | DIRECT MASS_POSITIVE_100_1000.m | Comment                |         | Acquired Time   | 09-Jun-23 12:17:16 PM (UTC+05:30) |

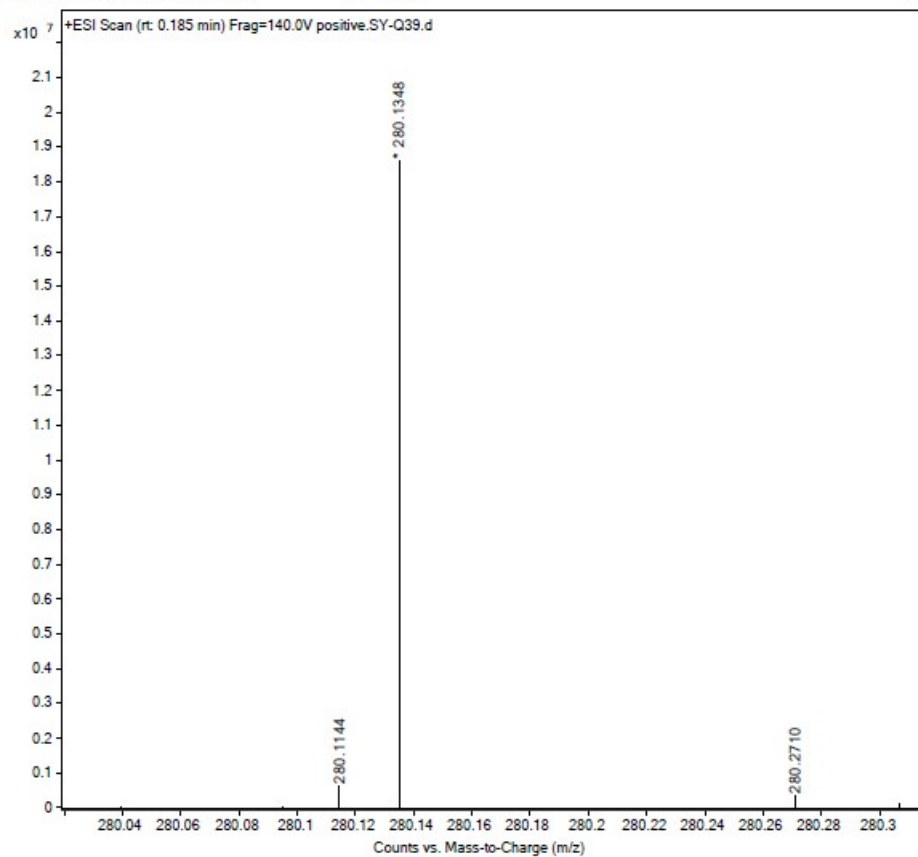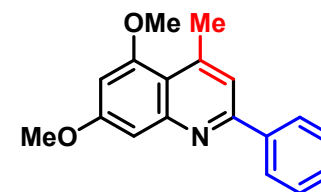

# <sup>1</sup>H NMR (500 MHz, CDCl<sub>3</sub>) spectrum of compound 4b

ATK-SY-Q41-1H.3.fid — ATK-SY-Q41-1H

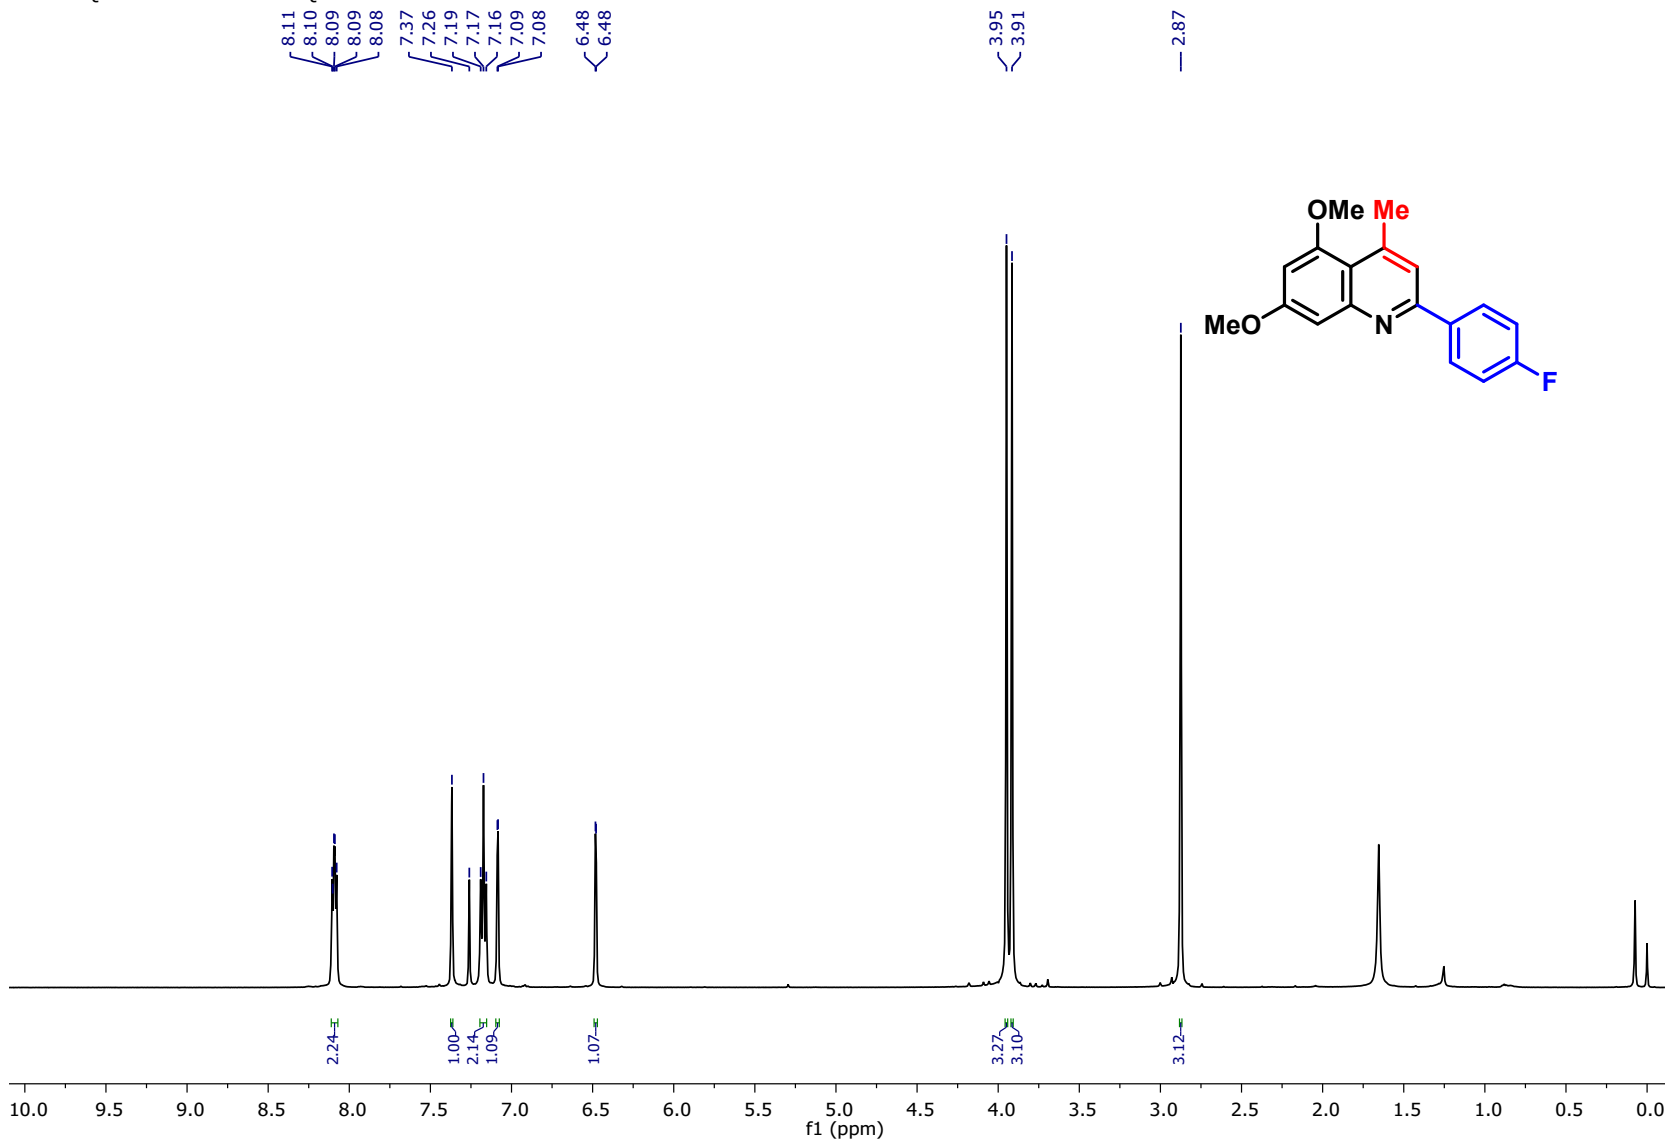

$^{13}\text{C}\{^1\text{H}\}$  NMR (125 MHz,  $\text{CDCl}_3$ ) spectrum of compound 4b

ATK-SY-Q41-13C.1.fid  
ATK-SY-Q41-13C

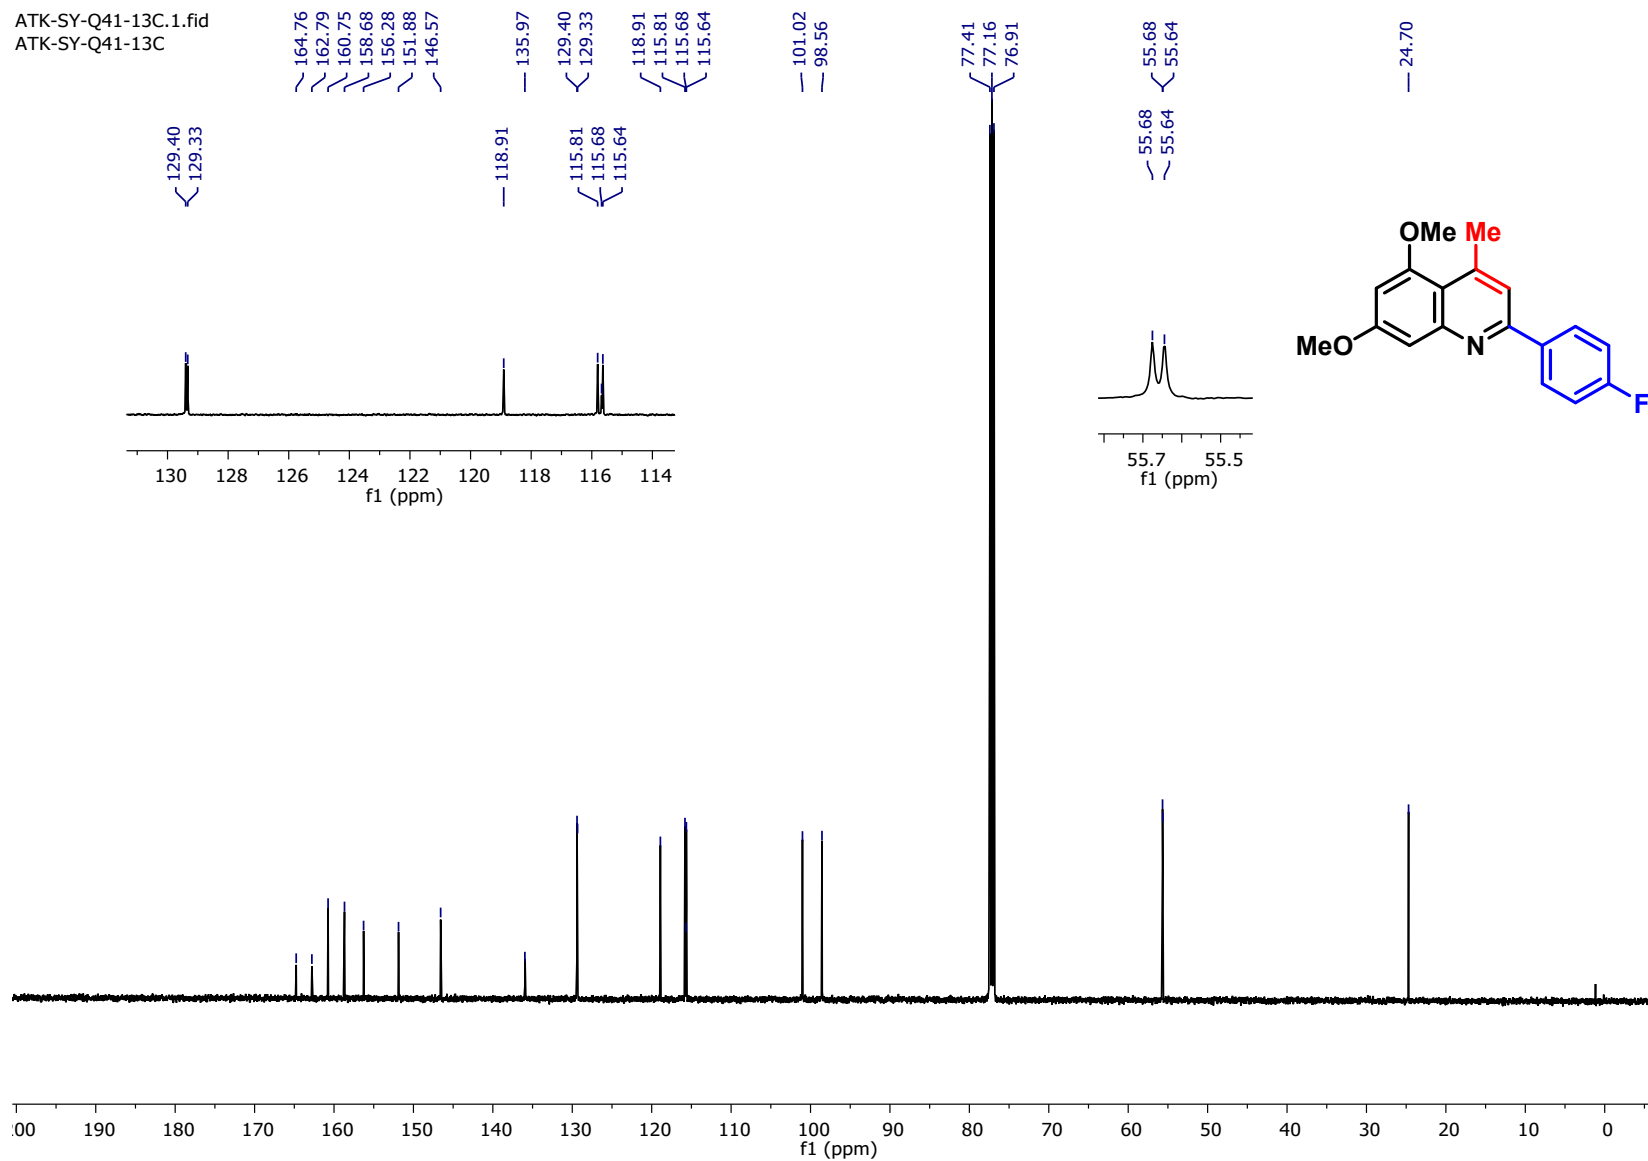

**<sup>19</sup>F NMR (471 MHz, CDCl<sub>3</sub>) spectrum of compound 4b**

SY-Q41-19F.1.fid — SY-Q41-19F

— -113.01

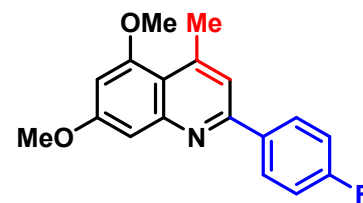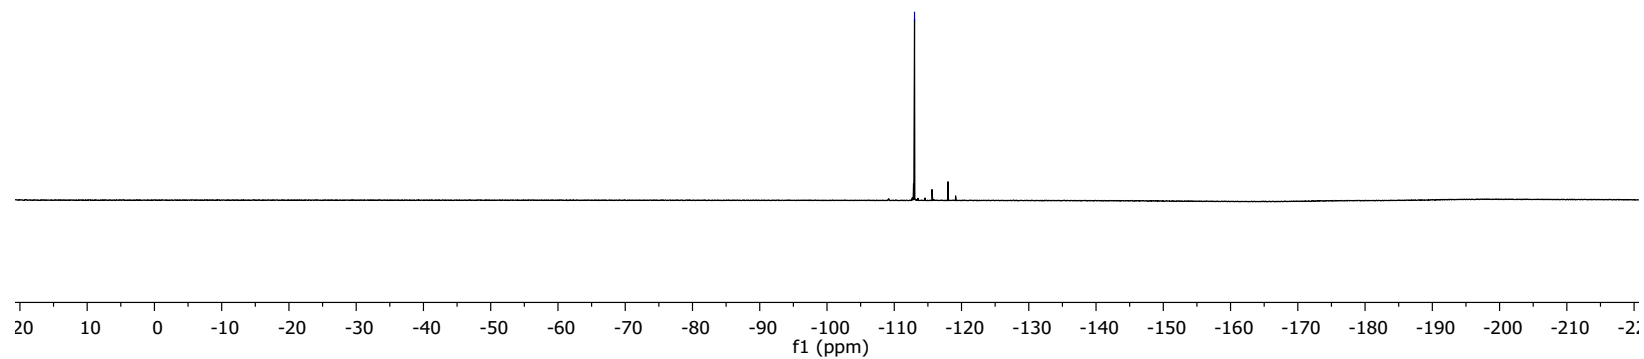

## HRMS spectrum of compound 4b

Sample Name  
User Name  
Sample Type  
ACQ Method

Sample24  
SYSTEM (SYSTEM)  
Sample  
DIRECT MASS\_POSITIVE\_100\_1500.m  
Position  
Inj Vol  
IRM Calibration Status  
Comment  
P1-C2  
5  
Success

Instrument Name  
InjPosition  
Data Filename  
Acquired Time  
QTOF  
BS.SYQ41.d  
16-Jun-23 10:36:34 AM (UTC+05:30)

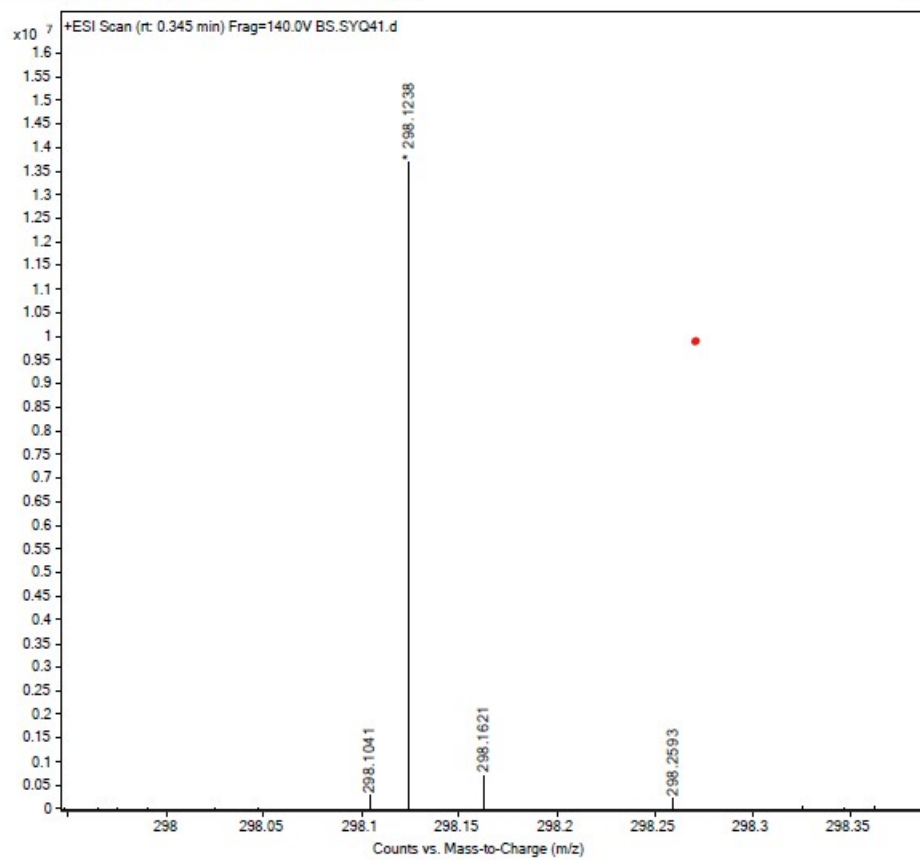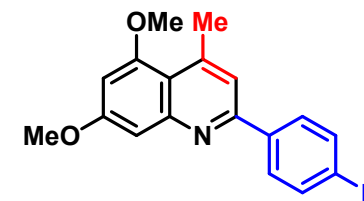

**<sup>1</sup>H NMR (500 MHz, CDCl<sub>3</sub>) spectrum of compound 4c**

ATK-SY-Q48-1H.3.fid — ATK-SY-Q48-1H

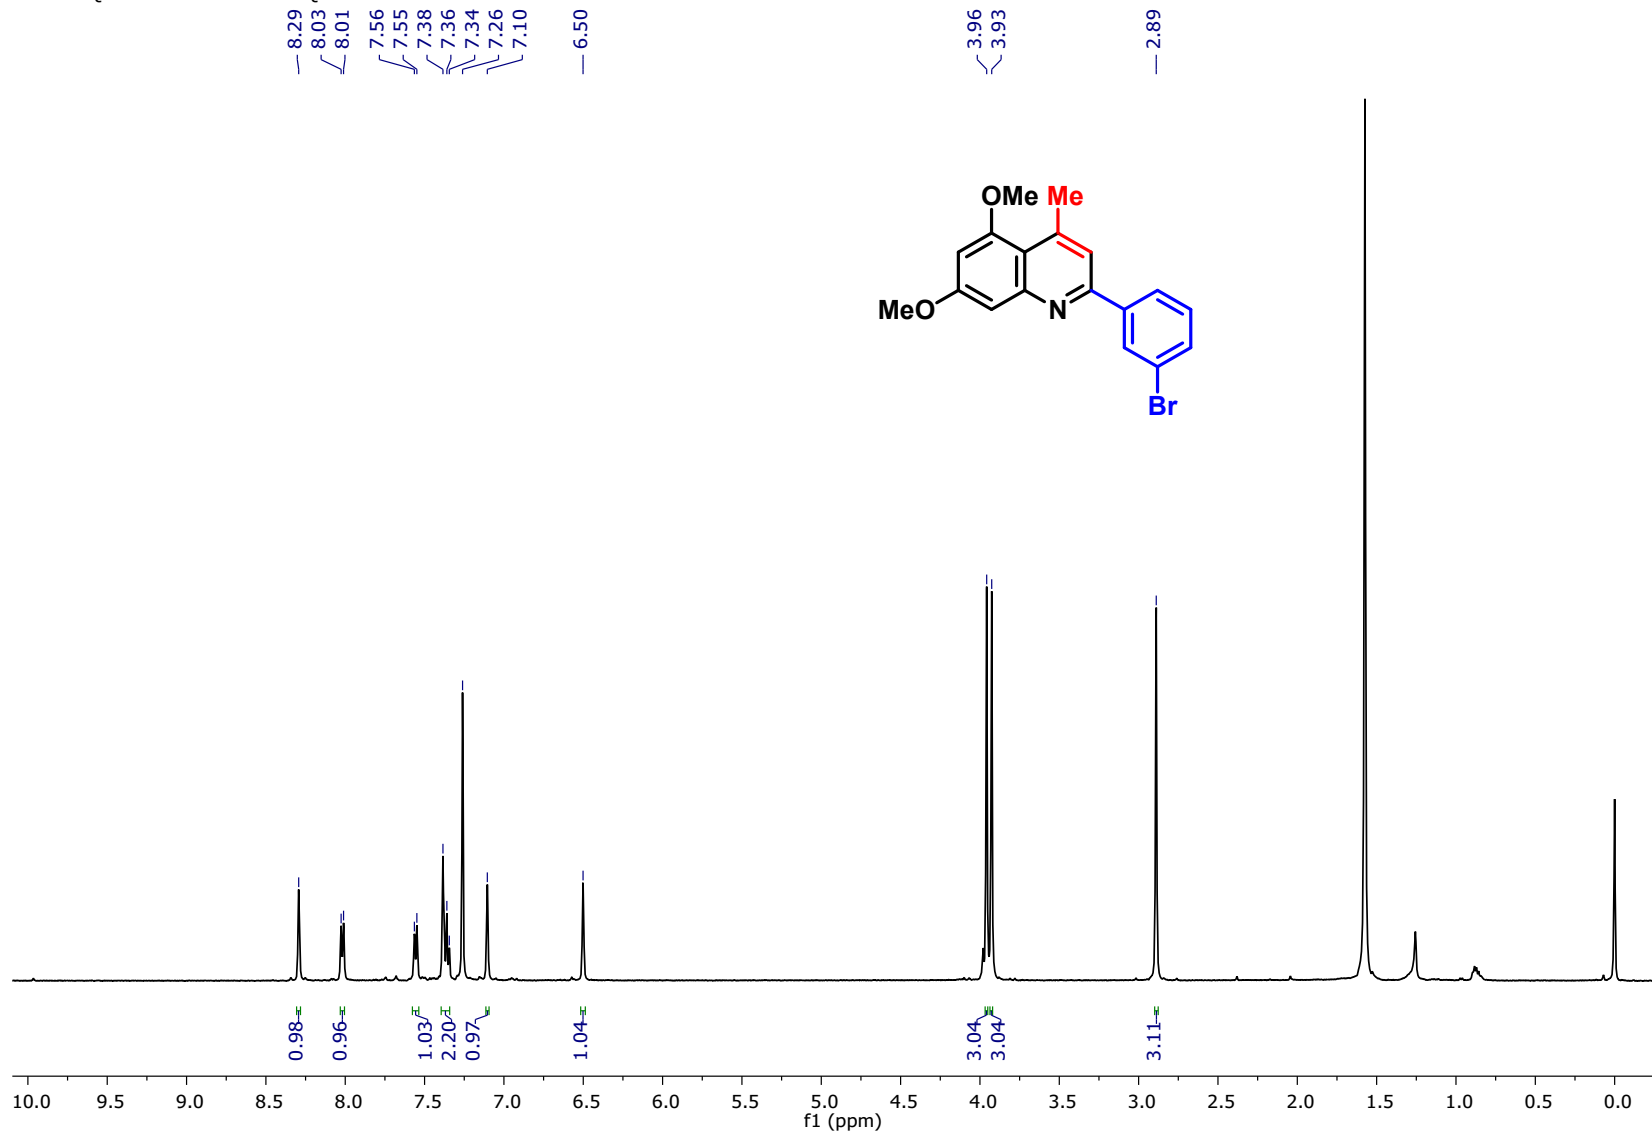



$^{13}\text{C}\{^1\text{H}\}$  (125 MHz,  $\text{CDCl}_3$ ) NMR spectrum of compound 4c

ATK-SY-Q48-13C.1.fid — ATK-SY-Q48-13C

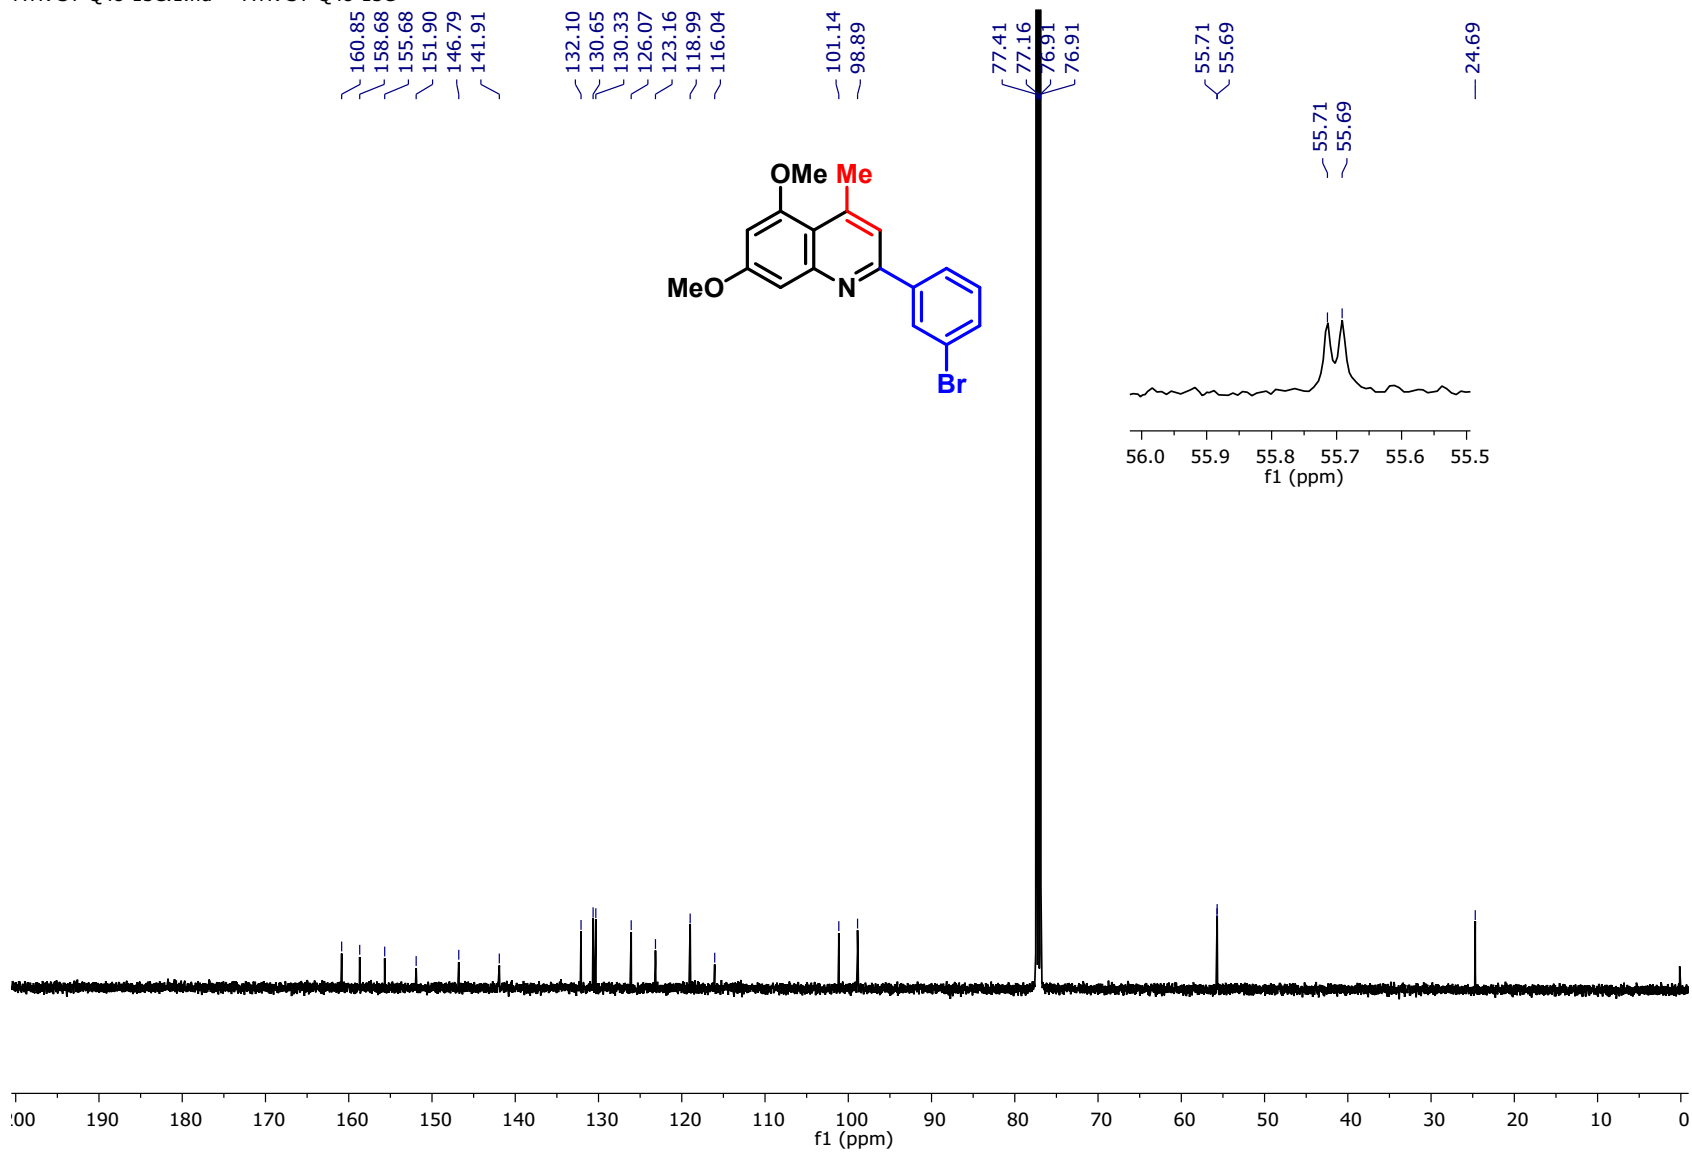

## HRMS spectrum of compound 4c

|             |                             |                        |         |                 |                                   |
|-------------|-----------------------------|------------------------|---------|-----------------|-----------------------------------|
| Sample Name | Sample23                    | Position               | P1-C1   | Instrument Name | QTOF                              |
| User Name   | SYSTEM (SYSTEM)             | Inj Vol                | 5       | InjPosition     |                                   |
| Sample Type | Sample                      | IRM Calibration Status | Success | Data Filename   | SY-Q48.d                          |
| ACQ Method  | DIRECT MASS_POSITIVE_01_1.m | Comment                |         | Acquired Time   | 13-Jul-23 11:43:22 AM (UTC+05:30) |

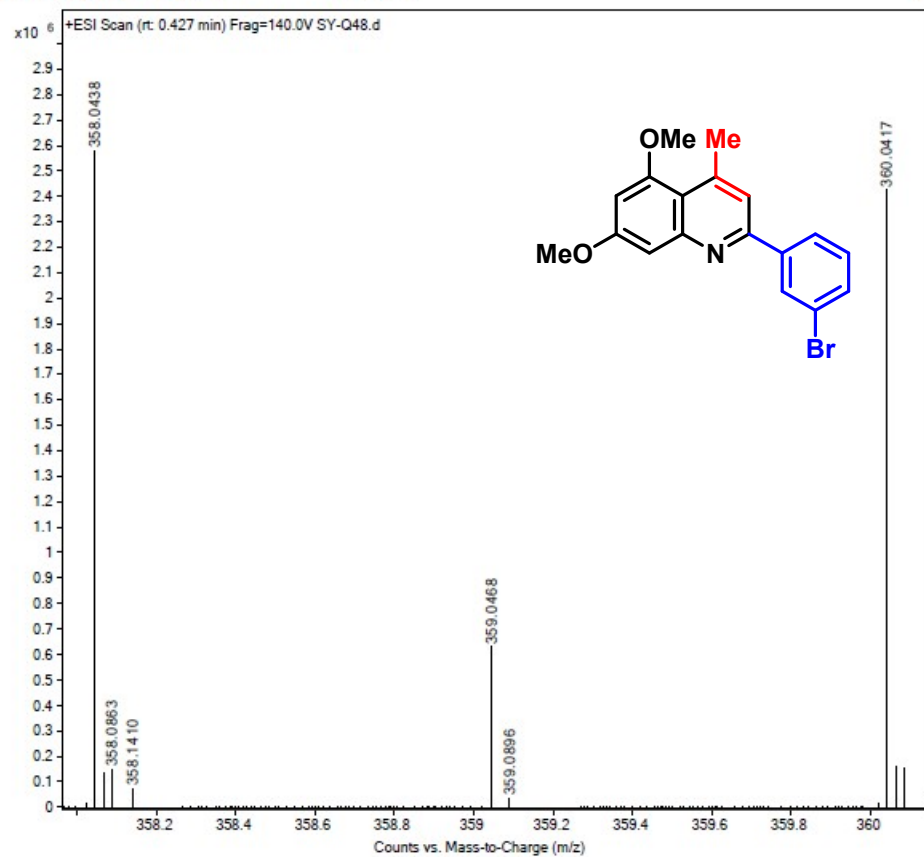

## HRMS spectrum of reaction intermediate B

|                      |                        |         |                 |         |
|----------------------|------------------------|---------|-----------------|---------|
| ATK_SY_Q22_RM_POS    | Position               | P1-C8   | Instrument Name | Instrun |
|                      | Inj Vol                | 10      | InjPosition     |         |
| Sample               | IRM Calibration Status | Success | Data Filename   | ATK_S1  |
| FULL SCAN-POSITIVE.m | Comment                |         | Acquired Time   | 28-Feb  |

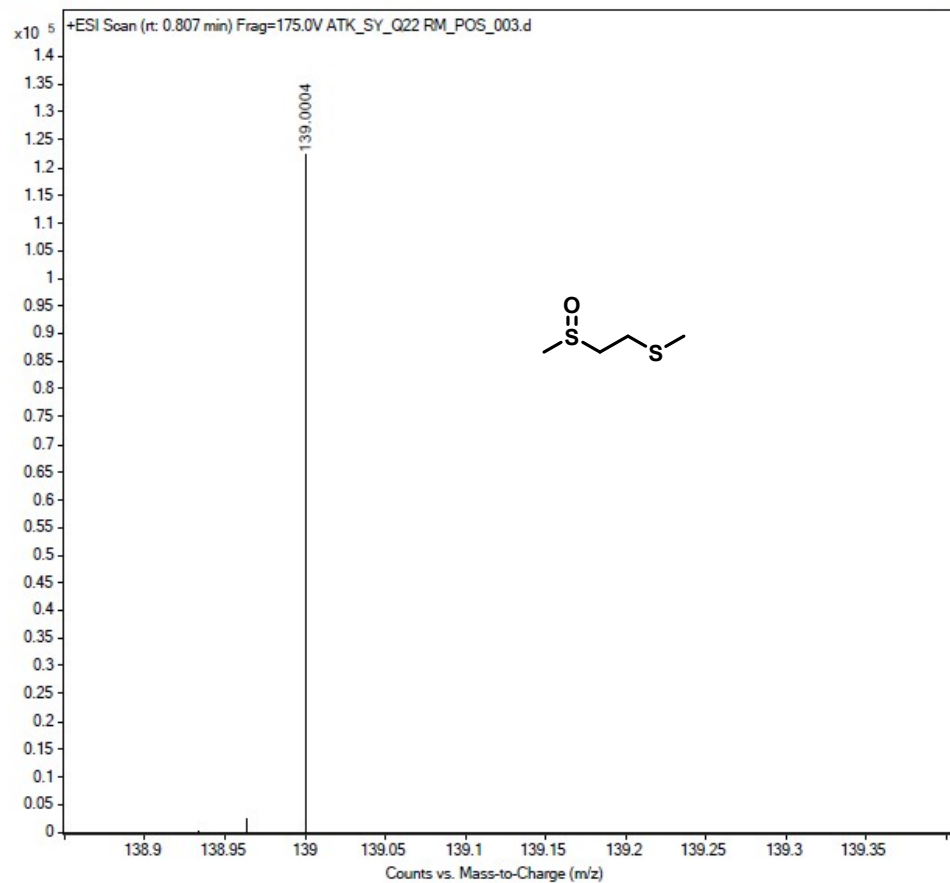

## HRMS spectrum of reaction intermediate D

ATK\_SY\_Q22 RM\_POS

Position P1-C8

Instrument Name

Instrument 1

Inj Vol 10

InjPosition

Sample

IRM Calibration Status Success

Data Filename

ATK\_SY\_Q22 RM\_

FULL SCAN-POSITIVE.m

Comment

Acquired Time

28-Feb-23 05:05::

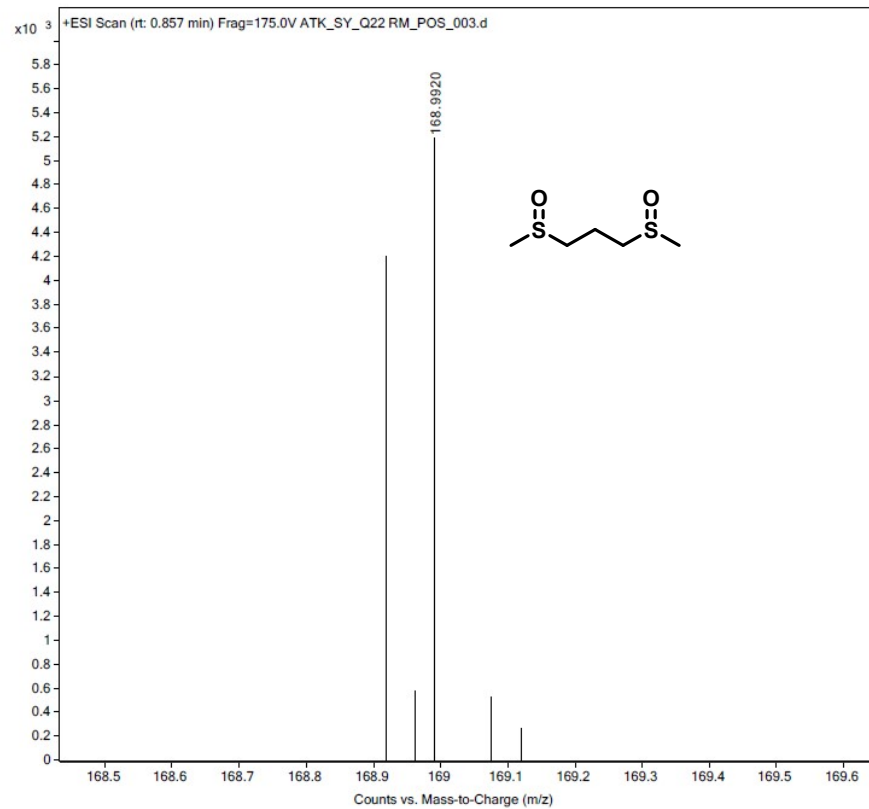

## HRMS spectrum of reaction intermediate H

|                      |                        |         |                 |                 |
|----------------------|------------------------|---------|-----------------|-----------------|
| ATK_SY_Q22_RM_POS    | Position               | P1-C8   | Instrument Name | Instrument 1    |
|                      | Inj Vol                | 10      | InjPosition     |                 |
| Sample               | IRM Calibration Status | Success | Data Filename   | ATK_SY_Q22_RM   |
| FULL SCAN-POSITIVE.m | Comment                |         | Acquired Time   | 28-Feb-23 05:05 |

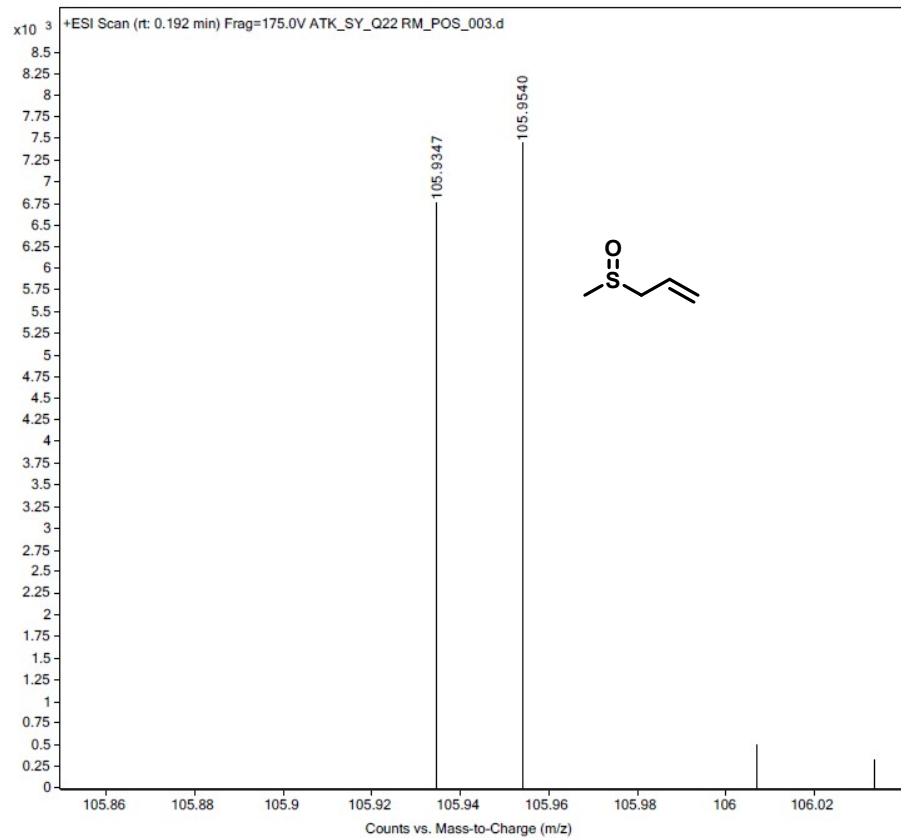

## HRMS spectrum of intermediate L of compound 3k

|                      |                        |         |                 |                    |
|----------------------|------------------------|---------|-----------------|--------------------|
| ATK_SY_Q22 RM_POS    | Position               | P1-C8   | Instrument Name | Instrument 1       |
|                      | Inj Vol                | 10      | InjPosition     |                    |
| Sample               | IRM Calibration Status | Success | Data Filename   | ATK_SY_Q22 RM_Pos  |
| FULL SCAN-POSITIVE.m | Comment                |         | Acquired Time   | 28-Feb-23 05:05:15 |

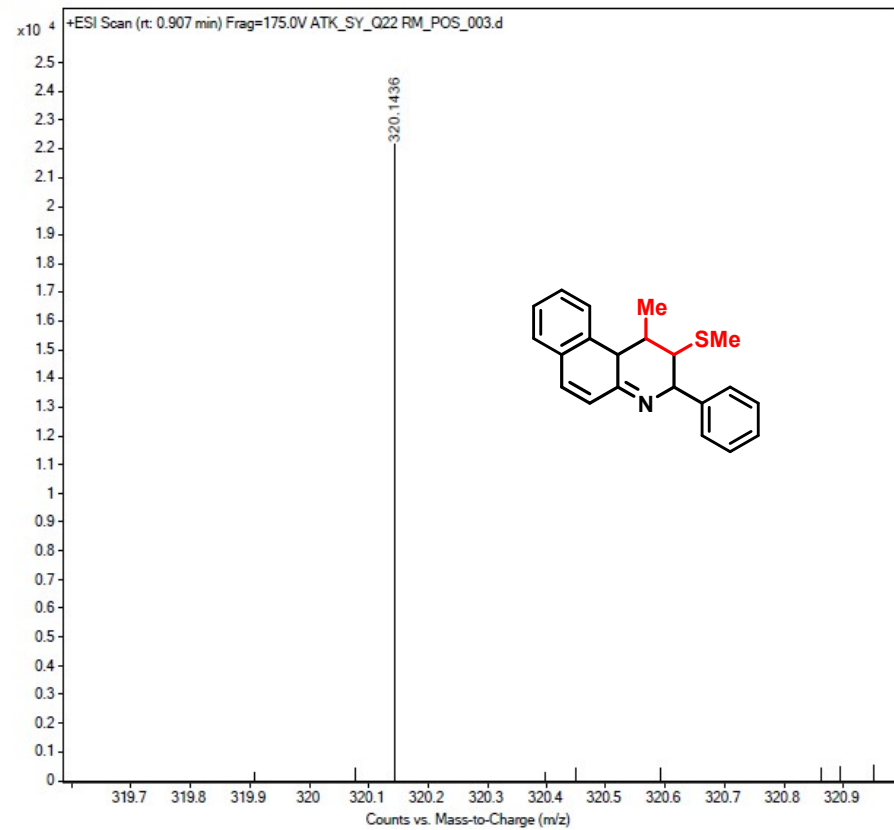

Supplement: d4ob00938j1.pdf [file d4ob00938j1.pdf]
